# Supplementary material
Source: PubMed Central journal article supplement (PMC10023369)
Supplement: NIHMS1876262-supplement-Chemistry_SI.pdf [file NIHMS1876262-supplement-Chemistry_SI.pdf]

## Supplemental Information

### PROTAC Linkerology Leads to an Optimized Bivalent Chemical Degradator of Polycomb Repressive Complex 2 (PRC2) Components

Frances M. Potjewyd<sup>1</sup>, Caroline A. Foley<sup>1</sup>, Han-Wee Ong<sup>1</sup>, Justin M. Rectenwald<sup>1</sup>, Ronan P. Hanley<sup>1</sup>, Jacqueline L. Norris-Drouin<sup>1</sup>, Stephanie H. Cholensky<sup>1</sup>, Christine A. Mills<sup>2</sup>, Kenneth H. Pearce<sup>1</sup>, Laura E. Herring<sup>2</sup>, Dmitri Kireev<sup>1</sup>, Stephen V. Frye<sup>1</sup>, Lindsey I. James<sup>1,3\*</sup>.

1. Center for Integrative Chemical Biology and Drug Discovery, Division of Chemical Biology and Medicinal Chemistry, UNC Eshelman School of Pharmacy, University of North Carolina at Chapel Hill, Chapel Hill, NC 27599, USA.

2. UNC Proteomics Core Facility, Department of Pharmacology, University of North Carolina at Chapel Hill, Chapel Hill, NC 27599, USA.

3. Lineberger Comprehensive Cancer Center, School of Medicine, University of North Carolina at Chapel Hill, Chapel Hill, NC 27599, USA.

\*Correspondence: [ingerman@email.unc.edu](mailto:ingerman@email.unc.edu)

#### Chemistry

|                                                      |        |
|------------------------------------------------------|--------|
| <b>1.1 General Chemistry Procedures</b> .....        | 1      |
| <b>1.2. Analysis of Products</b> .....               | 2      |
| <b>1.3. Synthetic Schemes</b> .....                  | 2 – 6  |
| <b>1.4. Chemistry Experimental and spectra</b> ..... | 7 – 88 |
| <b>References</b> .....                              | 88     |

### 1.1. General Chemistry Procedures

All reagents and solvents were obtained from commercial suppliers and were used without further purification unless otherwise stated. Reactions were carried out using conventional glassware and room temperature was generally 22 °C. Reactions were carried out at elevated temperatures using a temperature regulated hot plate-stirrer. Thin layer chromatography (TLC) was carried out using Merck silica plates coated with fluorescent indicator UV254. TLC plates were analysed under 254 nm UV light. Analytical LCMS data for all compounds was acquired using an Agilent 6110 Series system with the UV detector set to 254 nm. Samples were injected (<10 µL) onto an Agilent Eclipse Plus 4.6 × 50 mm, 1.8 µm, C18 column at room temperature. Mobile phases A (H<sub>2</sub>O + 0.1% acetic acid) and B (MeCN + 0.1% acetic acid) were used with a linear gradient from 10% to 100% B in 5.0 min, followed by a flush at 100% B for another 2 minutes with a flow rate of 1.0 mL/min. Mass spectra (MS) data were acquired in positive ion mode using an Agilent 6110 single quadrupole mass spectrometer with an electrospray ionization (ESI) source. Normal phase column chromatography was performed with a Teledyne Isco CombiFlash®R<sub>f</sub> 200 using RediSep®R<sub>f</sub> SILICA columns with the UV detector set to 254 nm and 280 nm. Reverse phase column chromatography was performed with a Teledyne Isco CombiFlash®R<sub>f</sub> 200 using C18 RediSep®R<sub>f</sub> Gold columns with the UV detector set to 220 nm and 254 nm. Preparative HPLC was performed using an Agilent Prep 1200 series with the UV detector set to 220 nm and 254 nm. Samples were injected onto either a Phenomenex Luna 250 × 30 mm (5 µm) C18 column or a Phenomenex Luna 75 × 30 mm (5 µm) C18 column at room temperature. Analytical LCMS (at 254 nm) was used to establish the purity of targeted compounds. All compounds that were evaluated in biochemical and biophysical assays had >95% purity as determined by LCMS.

### 1.2. Analysis of products

<sup>1</sup>H and <sup>13</sup>C NMR spectra were obtained on a Bruker AV 400 at 400 MHz, 101 MHz respectively. Chemical shifts are reported in parts per million (ppm) and coupling constants (*J* values) are reported in hertz (Hz) with CDCl<sub>3</sub> referenced at 7.26 (<sup>1</sup>H) and 77.1 ppm (<sup>13</sup>C), DMSO-*d*<sub>6</sub> referenced at 2.50 (<sup>1</sup>H) and 39.5 ppm (<sup>13</sup>C), acetone-*d*<sub>6</sub> referenced at 2.05 (<sup>1</sup>H) and 29.8 ppm (<sup>13</sup>C), and CD<sub>3</sub>OD-*d*<sub>4</sub> referenced at 3.31 (<sup>1</sup>H) and 49.0 ppm (<sup>13</sup>C). The multiplicities are included as: singlet (s), doublet (d), doublet of doublets/triplets/quartets (dd/dt/dq), triplet (t), triplet of doublets/triplets (td/tt), quartet (q), quartet of doublets (qd), pentent (p), and multiplet (m).

### 1.3. Synthetic Schemes

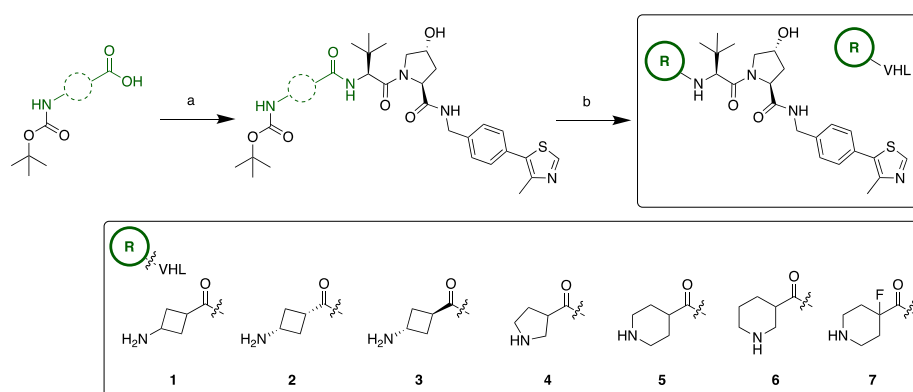

**Scheme S1.** Synthesis of R-VHL building blocks **1** – **7**. a) The corresponding *N*-Boc-R-CO<sub>2</sub>H precursor (1.0 equiv), TBTU (1.3 equiv), VHL-amine ligand (1.0 equiv), DIPEA (3.2 equiv), DMF, 16 hr; b) 20% TFA in CH<sub>2</sub>Cl<sub>2</sub>.

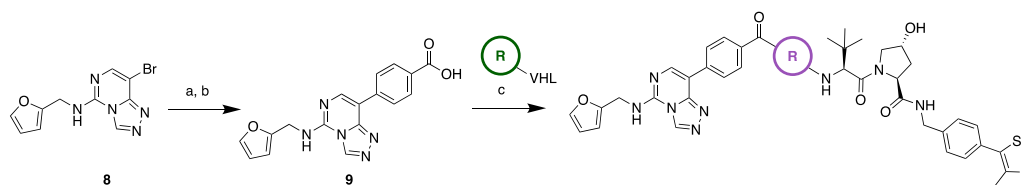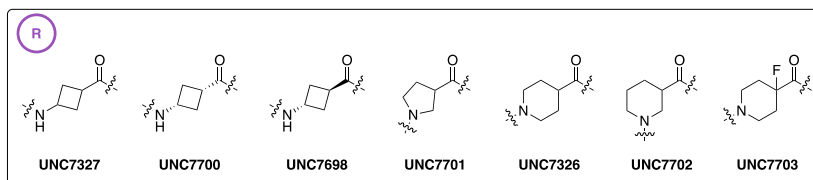

**Scheme S2.** Synthesis of an amide series of EED-targeted degraders. a) Triazolo[4,3-c]pyrimidin-5-amine (**8**) (1.0 equiv), Pd(dppf)Cl<sub>2</sub>.CH<sub>2</sub>Cl<sub>2</sub> (0.2 equiv), methyl 4-(4,4,5,5-tetramethyl-1,3,2-dioxaborolan-2-yl)benzoate (1.5 equiv), and sodium bicarbonate (2.5 equiv), N<sub>2</sub>, THF (4 mL), H<sub>2</sub>O (2 mL), 110 °C, 18 hr; b) LiOH (3.0 equiv), THF, H<sub>2</sub>O, 50 °C, 16 hr; c) **9** (1.0 equiv), **1 – 7** (1.0 equiv), TBTU (1.3 equiv), DIPEA (3.0 equiv), DMF.

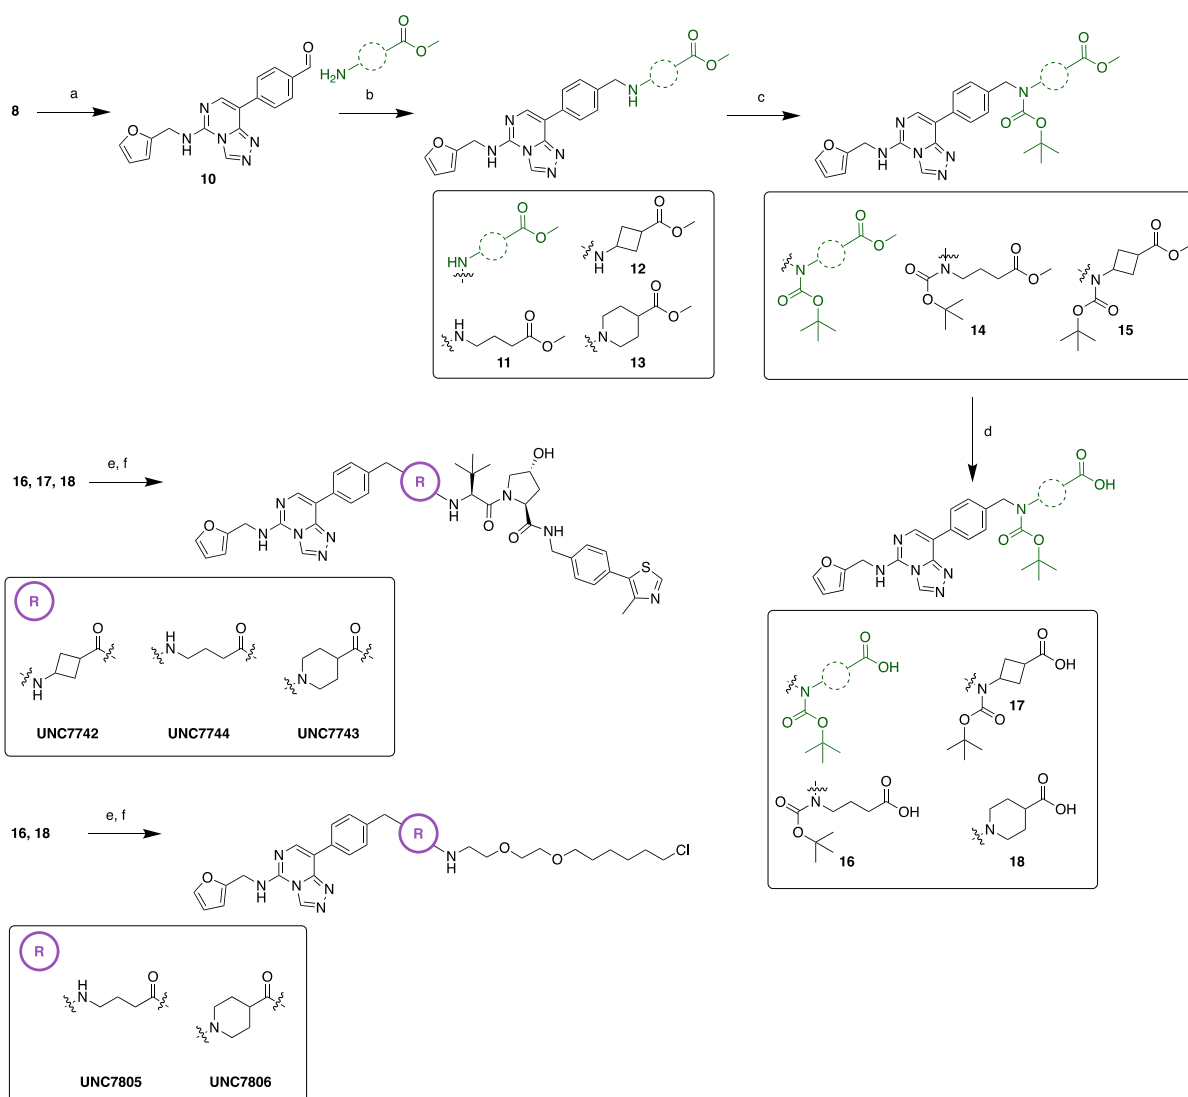

**Scheme S3.** Synthesis of a primary and secondary amine series of EED-targeted degraders and chloro-tagged compounds. a) To a microwave vial was added 4-(4,4,5,5-tetramethyl-1,3,2-dioxaborolan-2-

yl)benzaldehyde (1.5 equiv), **8** (1.0 equiv), Pd(dppf)Cl<sub>2</sub>.CH<sub>2</sub>Cl<sub>2</sub> (0.2 equiv), sodium bicarbonate (2.5 equiv), THF and H<sub>2</sub>O, 90 °C, 16 hr; b) Amine (1.1 equiv), **10** (1.0 equiv), sodium sulfate (1.1 equiv), DIPEA (2.1 equiv), CH<sub>2</sub>Cl<sub>2</sub>, 40 °C for 1hr. Followed by MeOH, sodium tetrahydroborate (1.2 equiv), rt, 16 hr; c) **11** – **12** (1.0 equiv), CH<sub>2</sub>Cl<sub>2</sub>, Boc anhydride (1.1 equiv), NEt<sub>3</sub> (2.5 equiv), rt, 16 hr; d) **13** – **15** (1.0 equiv), LiOH.H<sub>2</sub>O (3.0 equiv), H<sub>2</sub>O, THF, rt, 16 hr; e) **16**, **18** (1.0 equiv), DIPEA (3.0 equiv), TBTU (1.3 equiv), DMF, 16 hr; f) 20% TFA in CH<sub>2</sub>Cl<sub>2</sub>.

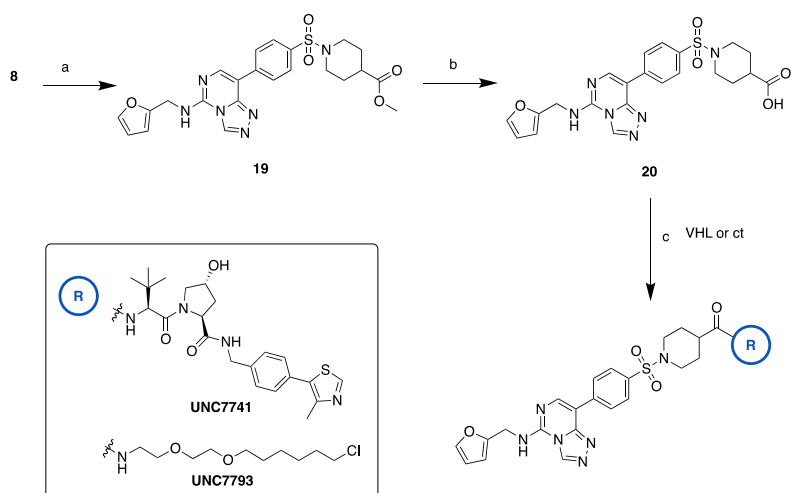

**Scheme S4.** Synthesis of a sulfonamide series of EED-targeted degraders and ct compounds. a) 1-((4-(4,4,5,5-tetramethyl-1,3,2-dioxaborolan-2-yl)phenyl)sulfonyl)piperidine-4-carboxylate (1.5 equiv), **8** (1.0 equiv), Pd(dppf)Cl<sub>2</sub>.CH<sub>2</sub>Cl<sub>2</sub> (0.2 equiv), sodium bicarbonate (2.5 equiv), THF, H<sub>2</sub>O, 90 °C, 16 hr; b) **19** (1.0 equiv), LiOH.H<sub>2</sub>O (3.0 equiv), THF, H<sub>2</sub>O, rt, 16 hr; c) **20** (1.0 equiv), DIPEA (3.0 equiv), TBTU (1.3 equiv), DMF, amine (1.1 equiv), rt, 16 hr.

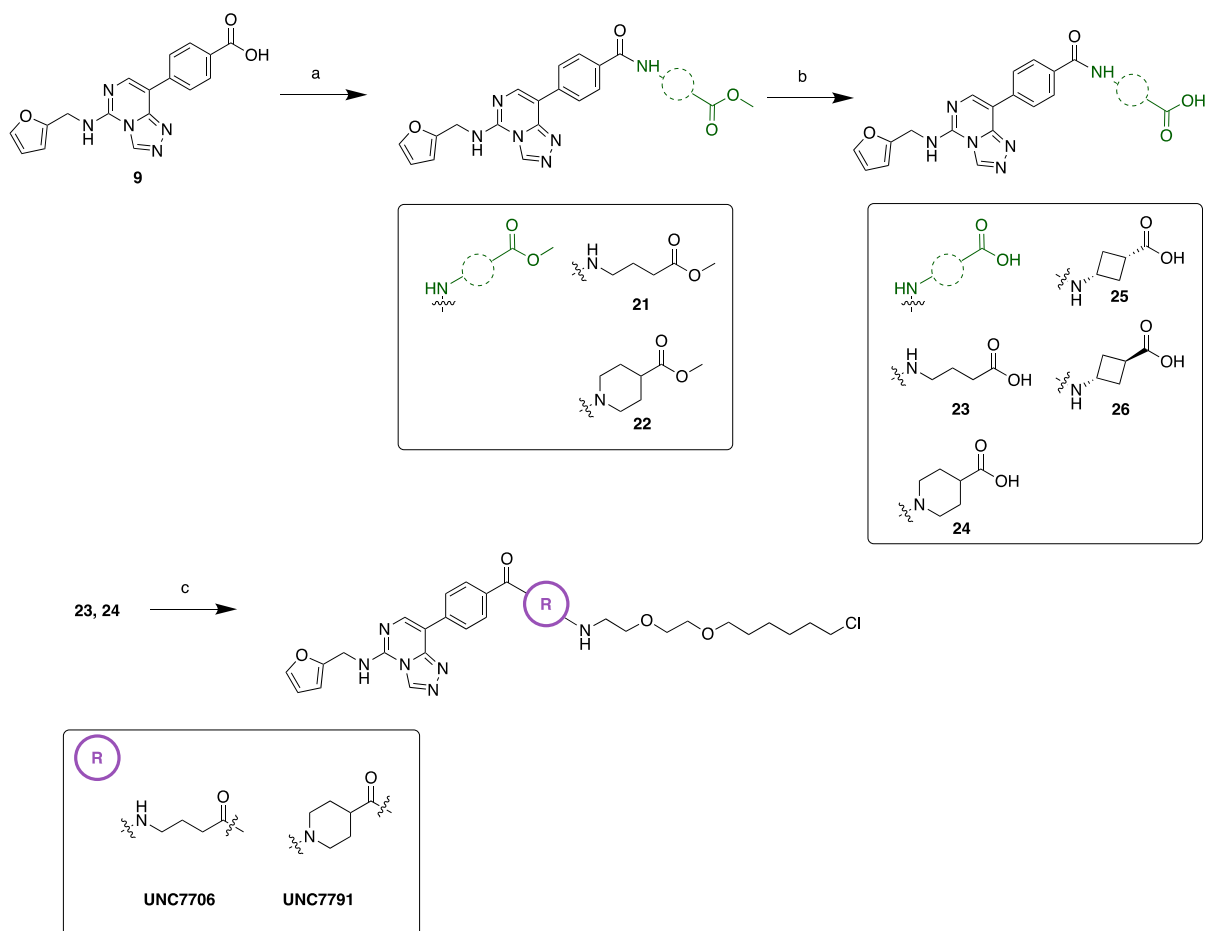

**Scheme S5.** Synthesis of amide linked EED-R-ct compounds. a) **9** (1.0 equiv), DIPEA (3.0 equiv), TBTU (1.3 equiv), DMF, amine (1.1 equiv), rt, 16 hr; b) **21** – **22** (1.0 equiv), LiOH.H<sub>2</sub>O (3.0 equiv), THF, H<sub>2</sub>O, rt, 16 hr; c) **23** – **24** (1.0 equiv), DIPEA (3.0 equiv), TBTU (1.3 equiv), DMF, amine (1.1 equiv), rt, 16 hr. **25** – **26** synthesized via a) and b) over two steps.

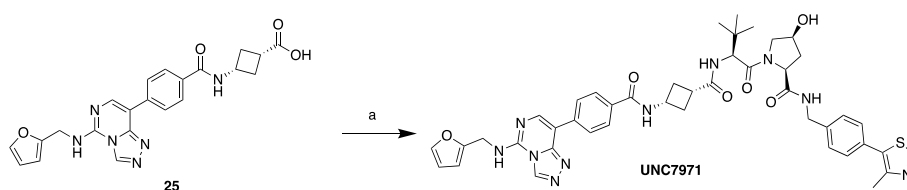

**Scheme S6.** Synthesis of a negative control degrader **UNC7971**. a) **25** (1.1 equiv), DIPEA (3.2 equiv), TBTU (1.3 equiv), DMF, amine (1.0 equiv), rt, 16 hr.

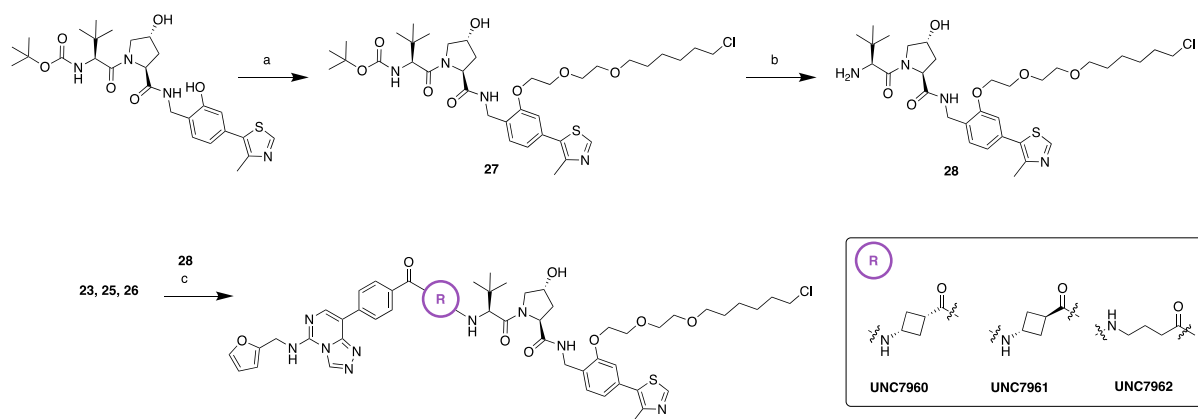

**Scheme S7.** Synthesis of PROTAC-O-ct compounds for the CAPA assay. a) *tert*-butyl ((*S*)-1-((2*S*,4*R*)-4-hydroxy-2-((2-hydroxy-4-(4-methylthiazol-5-yl)benzyl)carbamoyl)pyrrolidin-1-yl)-3,3-dimethyl-1-oxobutan-2-yl)carbamate (1.0 equiv), Cs<sub>2</sub>CO<sub>3</sub> (1.5 equiv), followed by 2-(2-((6-chlorohexyl)oxy)ethoxy)ethyl 4-methylbenzenesulfonate (1.3 equiv), DMF, rt, 16 hr; b) 20% TFA in CH<sub>2</sub>Cl<sub>2</sub>; c) **23**, **25**, **26** (1.1 equiv), TBTU (1.30 equiv), DIPEA (3.2 equiv), **28** (1.0 equiv), DMF, rt, 16 hr.

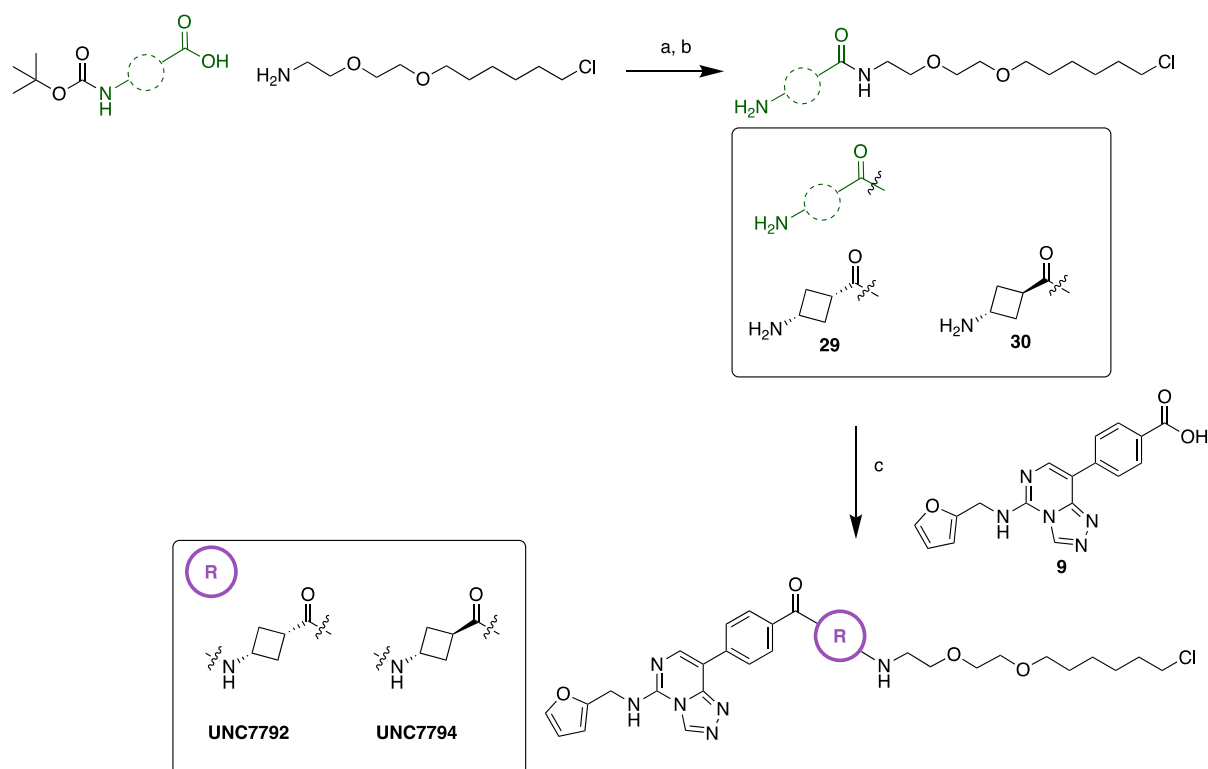

**Scheme S8.** Synthesis of *cis*- and *trans*- EED-R-ct cyclobutane isomers for the CAPA assay. a) Corresponding carboxylic acid (1.0 equiv), TBTU (1.3 equiv), DIPEA (3.2 equiv), 2-(2-((6-chlorohexyl)oxy)ethoxy)ethan-1-amine 2,2,2-trifluoroacetate (1.0 equiv), DMF, rt, 16 hr; b) 20% TFA in CH<sub>2</sub>Cl<sub>2</sub>; c) **9** (1.0 equiv), TBTU (1.3 equiv), DIPEA (3.2 equiv), **29** – **30** (1.0 equiv), DMF, rt, 16 hr.

### Abbreviations

Trifluoroacetic acid (TFA), *N,N*-Diisopropylethylamine (DIPEA), Dimethyl formamide (DMF), Tetrahydrofuran (THF), 2-(1*H*-benzo[*d*][1,2,3]triazol-1-yl)-1,1,3,3-tetramethyluronium tetrafluoroborate (TBTU), trifluoroacetic acid (TFA), chloroalkane tag (ct).

#### 1.4. Chemistry Experimental and Spectra

##### (2*S*,4*R*)-1-((*S*)-2-(3-aminocyclobutane-1-carboxamido)-3,3-dimethylbutanoyl)-4-hydroxy-*N*-(4-(4-methylthiazol-5-yl)benzyl)pyrrolidine-2-carboxamide 2,2,2-trifluoroacetate (**1**)

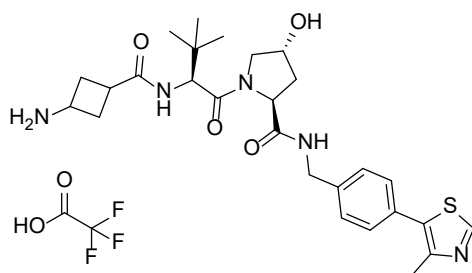

To a flask was added 3-((*tert*-butoxycarbonyl)amino)cyclobutane-1-carboxylic acid (20 mg, 92  $\mu\text{mol}$ , 1.0 equiv), DIPEA (51  $\mu\text{L}$ , 0.29 mmol, 3.2 equiv), and TBTU (38 mg, 0.12 mmol, 1.3 equiv) in DMF (1.0 mL), followed by addition of (2*S*,4*R*)-1-((*S*)-2-amino-3,3-dimethylbutanoyl)-4-hydroxy-*N*-(4-(4-methylthiazol-5-yl)benzyl)pyrrolidine-2-carboxamide 2,2,2-trifluoroacetate (50 mg, 92  $\mu\text{mol}$ , 1.0 equiv). The reaction was stirred at room temperature for 16 hr, concentrated *in vacuo* and purified by column chromatography (silica, 0-10% MeOH in  $\text{CH}_2\text{Cl}_2$ ). The reaction was telescoped into the *N*-Boc deprotection with 20% TFA in  $\text{CH}_2\text{Cl}_2$  (2 mL), concentrated *in vacuo* and purified by reverse phase column chromatography (C18, 0-100% MeCN in  $\text{H}_2\text{O}$ , 0.1% TFA). The product was concentrated to yield the desired product as a clear oil (2*S*,4*R*)-1-((*S*)-2-(3-aminocyclobutane-1-carboxamido)-3,3-dimethylbutanoyl)-4-hydroxy-*N*-(4-(4-methylthiazol-5-yl)benzyl)pyrrolidine-2-carboxamide 2,2,2-trifluoroacetate (**1**) (34 mg, 58 %) over two steps.

$^1\text{H}$  NMR ( $\text{CD}_3\text{OD}-d_4$ , 400 MHz):  $\delta$  9.05 (s, 1H), 7.50 – 7.41 (m, 4H), 4.67- 4.62 (m, 1H), 4.60 – 4.51 (m, 3H), 4.36 (d,  $J$  = 15.6 Hz, 1H), 4.00 – 3.90 (m, 2H), 3.82 (dt,  $J$  = 10.9, 3.4 Hz, 1H), 3.75 – 3.68 (m, 1H), 3.17 – 3.07 (m, 1H), 2.66 – 2.53 (m, 2H), 2.49 (s, 3H), 2.46 – 2.35 (m, 1H), 2.34 – 2.20 (m, 2H), 2.13 – 2.05 (m, 1H), 1.04 (s, 9H).  $^{13}\text{C}$  NMR ( $\text{CD}_3\text{OD}-d_4$ , 101 MHz):  $\delta$  176.36, 175.49, 174.41, 172.19, 172.11, 153.39, 148.04, 140.63, 134.01, 130.99, 130.37, 129.03, 71.11, 60.83, 59.38, 59.25, 58.00, 45.21, 43.68, 43.42, 39.05, 39.01, 36.67, 36.63, 34.51, 33.88, 31.62, 31.39, 31.22, 30.96, 26.98, 26.96, 15.37. Extra carbon peaks observed due to diastomeric mixture. LCMS: expected mass for  $[\text{M}+\text{H}]^+$  ( $\text{C}_{27}\text{H}_{38}\text{N}_5\text{O}_4\text{S}$ ) requires 528.26 m/z, found 528.20 m/z.

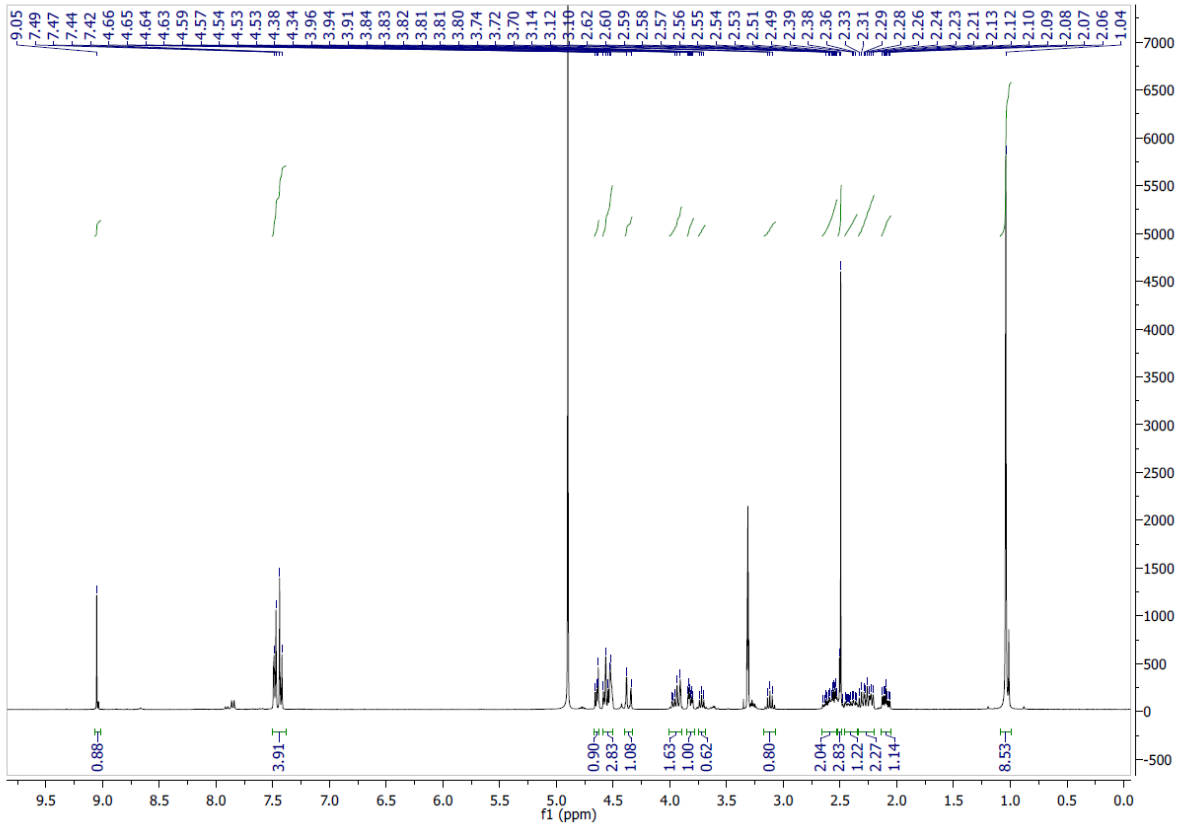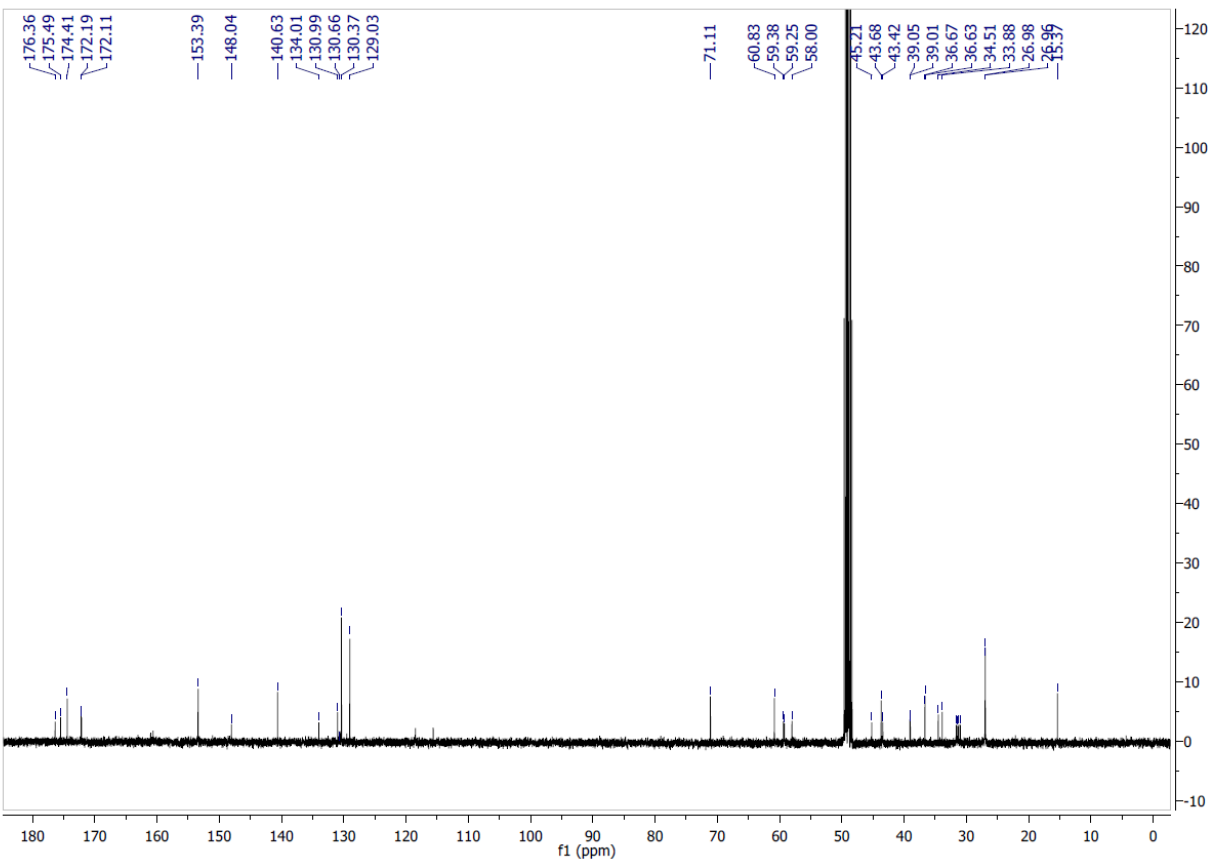



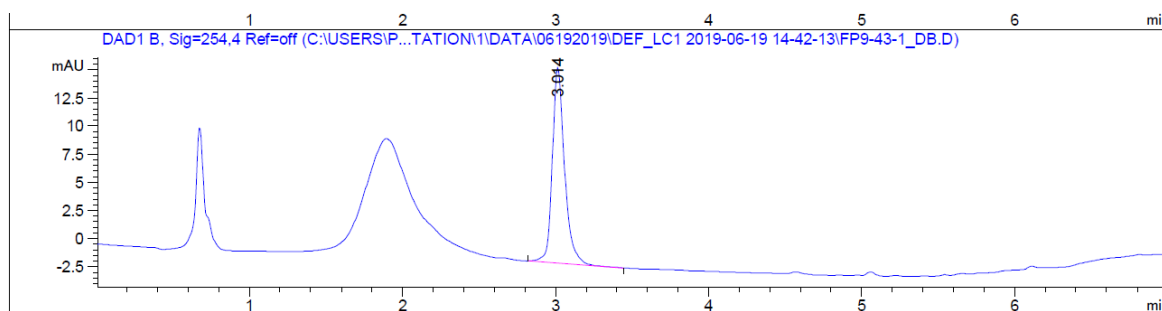

**(2*S*,4*R*)-1-((*S*)-2-((1*S*,3*R*)-3-aminocyclobutane-1-carboxamido)-3,3-dimethylbutanoyl)-4-hydroxy-*N*-(4-(4-methylthiazol-5-yl)benzyl)pyrrolidine-2-carboxamide 2,2,2-trifluoroacetate (**2**)**

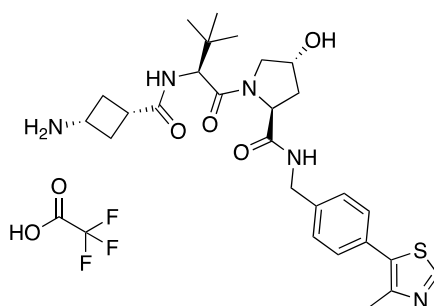

To a flask was added (1*S*,3*S*)-3-((*tert*-butoxycarbonyl)amino)cyclobutane-1-carboxylic acid (9.9 mg, 46  $\mu$ mol, 1.0 equiv), DIPEA (26  $\mu$ L, 0.15 mmol, 3.2 equiv), and TBTU (19 mg, 60  $\mu$ mol, 1.3 equiv) in DMF (1.0 mL), followed by addition of (2*S*,4*R*)-1-((*S*)-2-amino-3,3-dimethylbutanoyl)-4-hydroxy-*N*-(4-(4-methylthiazol-5-yl)benzyl)pyrrolidine-2-carboxamide 2,2,2-trifluoroacetate (25 mg, 46  $\mu$ mol, 1.0 equiv). The reaction was stirred at room temperature for 16 hr, concentrated *in vacuo* and purified by column chromatography (silica, 0-10% MeOH in  $\text{CH}_2\text{Cl}_2$ ). The reaction was telescoped into the *N*-Boc deprotection with 20% TFA in  $\text{CH}_2\text{Cl}_2$  (2 mL), concentrated *in vacuo* and purified by reverse phase column chromatography (C18, 0-100% MeCN in  $\text{H}_2\text{O}$ , 0.1% TFA). The product was concentrated to yield the desired product as a clear oil (2*S*,4*R*)-1-((*S*)-2-((1*S*,3*R*)-3-aminocyclobutane-1-carboxamido)-3,3-dimethylbutanoyl)-4-hydroxy-*N*-(4-(4-methylthiazol-5-yl)benzyl)pyrrolidine-2-carboxamide 2,2,2-trifluoroacetate (**2**) (13 mg, 43 %) over two steps.

$^1\text{H}$  NMR ( $\text{CD}_3\text{OD}-d_4$ , 400 MHz):  $\delta$  8.94 (s, 1H), 7.49 – 7.40 (m, 4H), 4.63 (s, 1H), 4.59 – 4.50 (m, 3H), 4.35 (d,  $J$  = 15.53 Hz, 1H), 3.92 (d,  $J$  = 11.04 Hz, 1H), 3.81 (dd,  $J$  = 3.85, 10.95 Hz, 1H), 3.76 – 3.66 (m, 1H), 3.16 – 3.07 (m, 1H), 2.65 – 2.58 (m, 1H), 2.57 – 2.52 (m, 1H), 2.48 (s, 3H), 2.33 – 2.20 (m, 3H), 2.09 (ddd,  $J$  = 4.42, 9.21, 13.33 Hz, 1H), 1.04 (s, 9H).  $^{13}\text{C}$  NMR ( $\text{CD}_3\text{OD}-d_4$ , 101 MHz):  $\delta$  175.49, 174.41, 172.11, 153.03, 140.40, 131.35, 130.36, 128.99, 71.12, 60.84, 59.37, 58.00, 43.69, 43.41, 39.05, 36.64, 33.88, 31.62, 31.22, 26.96, 15.65. LCMS: expected mass for  $[\text{M}+\text{H}]^+$  ( $\text{C}_{27}\text{H}_{38}\text{N}_5\text{O}_4\text{S}$ ) requires 528.26  $m/z$ , found 528.20  $m/z$ .

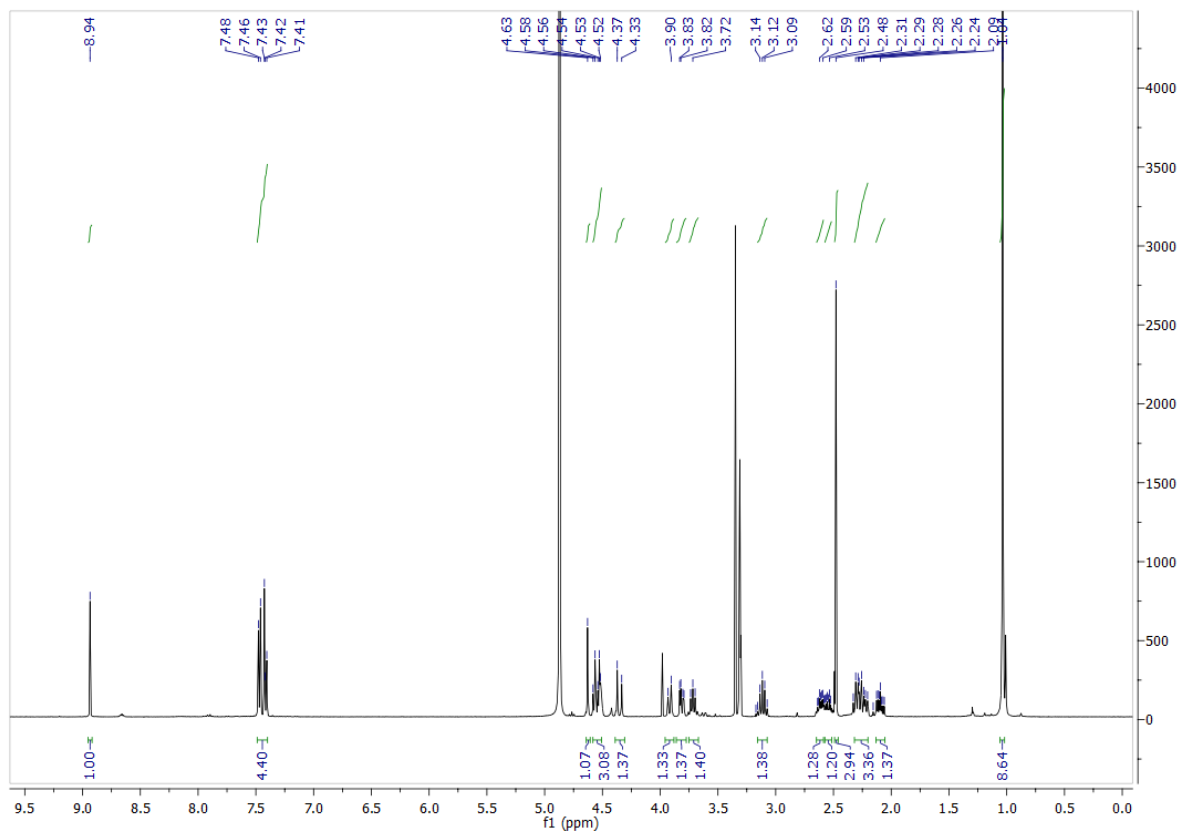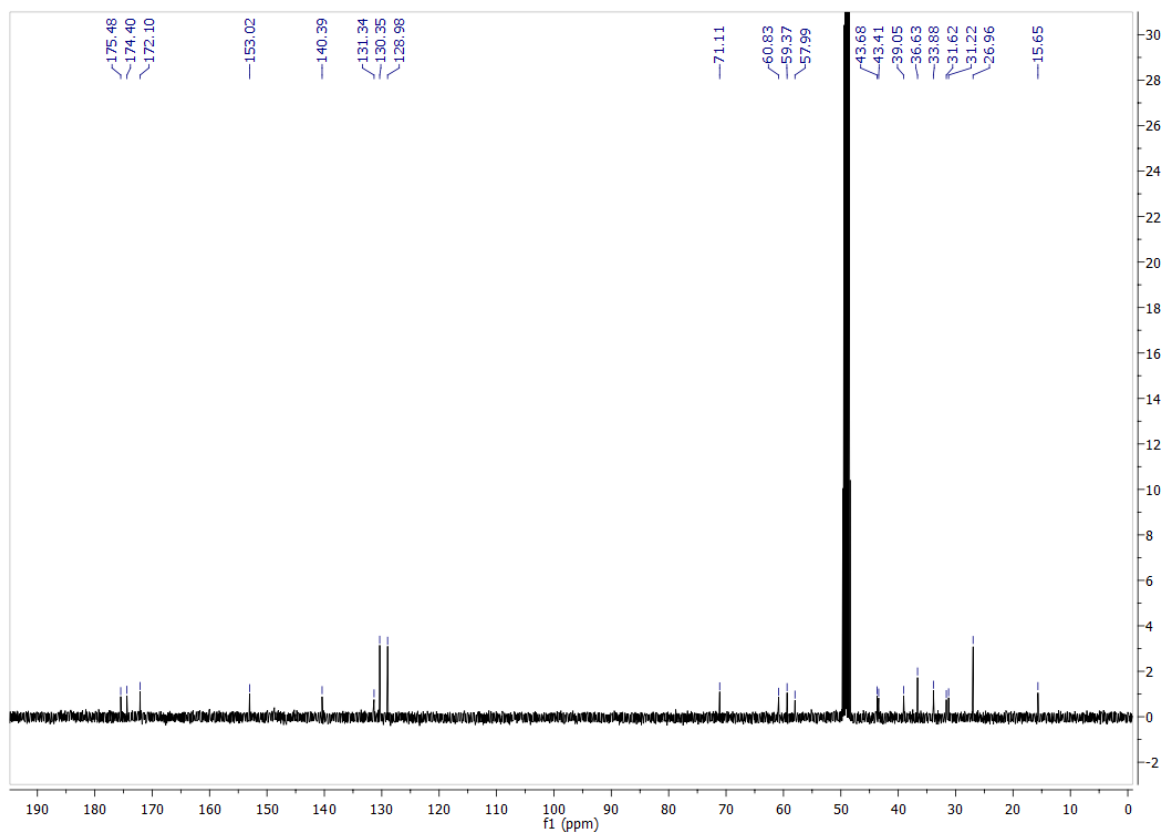

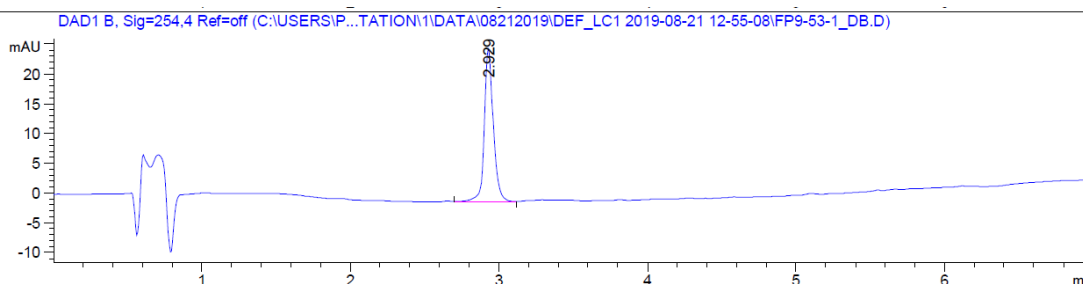

**(2*S*,4*R*)-1-((*S*)-2-((1*R*,3*S*)-3-aminocyclobutane-1-carboxamido)-3,3-dimethylbutanoyl)-4-hydroxy-*N*-(4-(4-methylthiazol-5-yl)benzyl)pyrrolidine-2-carboxamide 2,2,2-trifluoroacetate (**3**)**

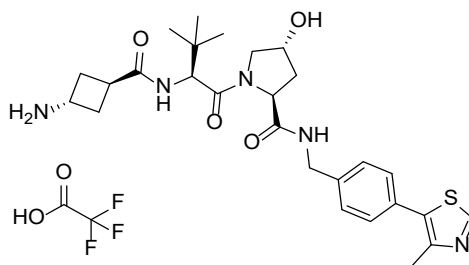

To a flask was added (1*R*,3*R*)-3-((*tert*-butoxycarbonyl)amino)cyclobutane-1-carboxylic acid (9.9 mg, 46  $\mu$ mol, 1.0 equiv), DIPEA (26  $\mu$ L, 0.15 mmol, 3.2 equiv), and TBTU (19 mg, 60  $\mu$ mol, 1.3 equiv) in DMF (1.0 mL), followed by addition of (2*S*,4*R*)-1-((*S*)-2-amino-3,3-dimethylbutanoyl)-4-hydroxy-*N*-(4-(4-methylthiazol-5-yl)benzyl)pyrrolidine-2-carboxamide 2,2,2-trifluoroacetate (25 mg, 46  $\mu$ mol, 1.0 equiv). The reaction was stirred at room temperature for 16 hr, concentrated *in vacuo* and purified by column chromatography (silica, 0-10% MeOH in  $\text{CH}_2\text{Cl}_2$ ). The reaction was telescoped into the *N*-Boc deprotection with 20% TFA in  $\text{CH}_2\text{Cl}_2$  (2 mL), concentrated *in vacuo* and purified by reverse phase column chromatography (C18, 0-100% MeCN in  $\text{H}_2\text{O}$ , 0.1% TFA). The product was concentrated to yield the desired product as a clear oil (2*S*,4*R*)-1-((*S*)-2-((1*R*,3*S*)-3-aminocyclobutane-1-carboxamido)-3,3-dimethylbutanoyl)-4-hydroxy-*N*-(4-(4-methylthiazol-5-yl)benzyl)pyrrolidine-2-carboxamide 2,2,2-trifluoroacetate (**3**) (18 mg, 61 %) over two steps.

$^1\text{H}$  NMR ( $\text{CD}_3\text{OD}-d_4$ , 400 MHz):  $\delta$  8.97 (s, 1H), 7.49 – 7.39 (m, 4H), 4.64 – 4.62 (m, 1H), 4.60 – 4.49 (m, 3H), 4.36 (d,  $J = 15.51$  Hz, 1H), 3.98 – 3.90 (m, 2H), 3.82 (dd,  $J = 3.86, 10.96$  Hz, 1H), 3.29 – 3.23 (m, 1H), 2.54 – 2.51 (m, 2H), 2.48 (s, 3H), 2.46 – 2.35 (m, 2H), 2.23 (dd,  $J = 7.65, 13.15$  Hz, 1H), 2.12 – 2.06 (m, 1H), 1.04 (s, 9H).  $^{13}\text{C}$  NMR ( $\text{CD}_3\text{OD}-d_4$ , 101 MHz):  $\delta$  176.37, 174.41, 172.19, 153.14, 140.46, 131.22, 130.36, 129.00, 71.10, 60.83, 59.24, 58.01, 45.20, 43.68, 39.00, 36.66, 34.51, 31.38, 30.95, 26.98, 15.57. LCMS: expected mass for  $[\text{M}+\text{H}]^+$  ( $\text{C}_{27}\text{H}_{38}\text{N}_5\text{O}_4\text{S}$ ) requires 528.26 m/z, found 528.20 m/z.

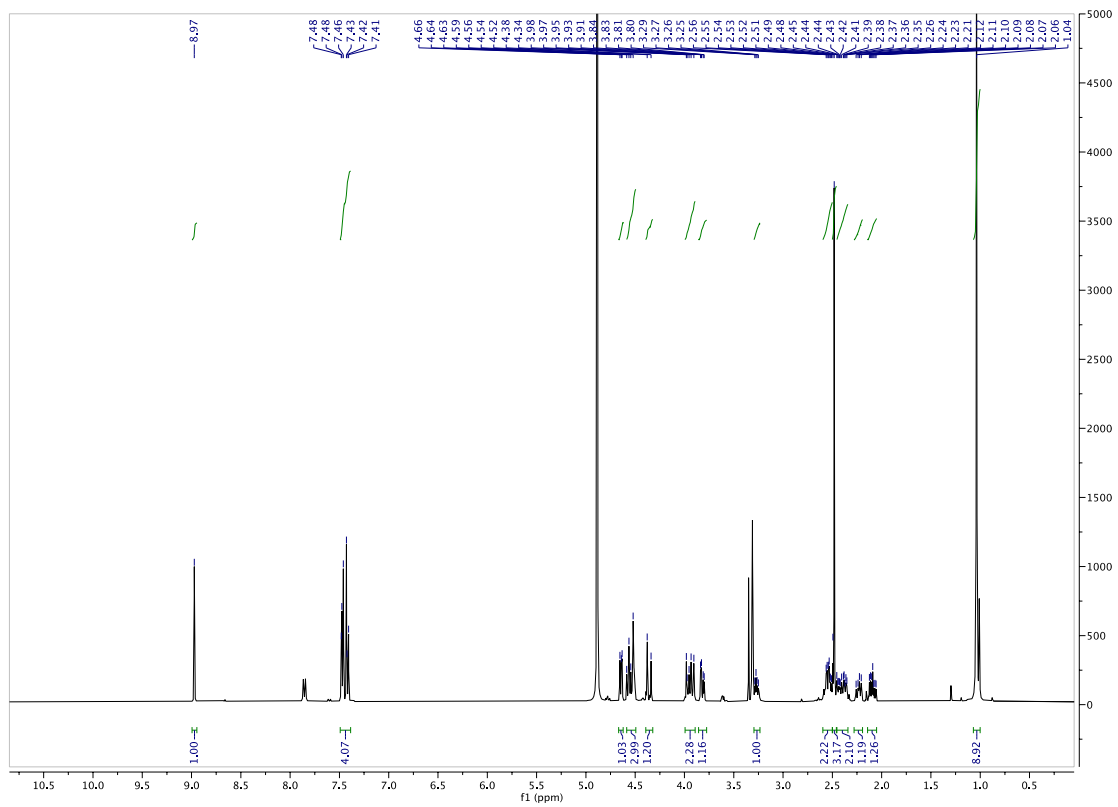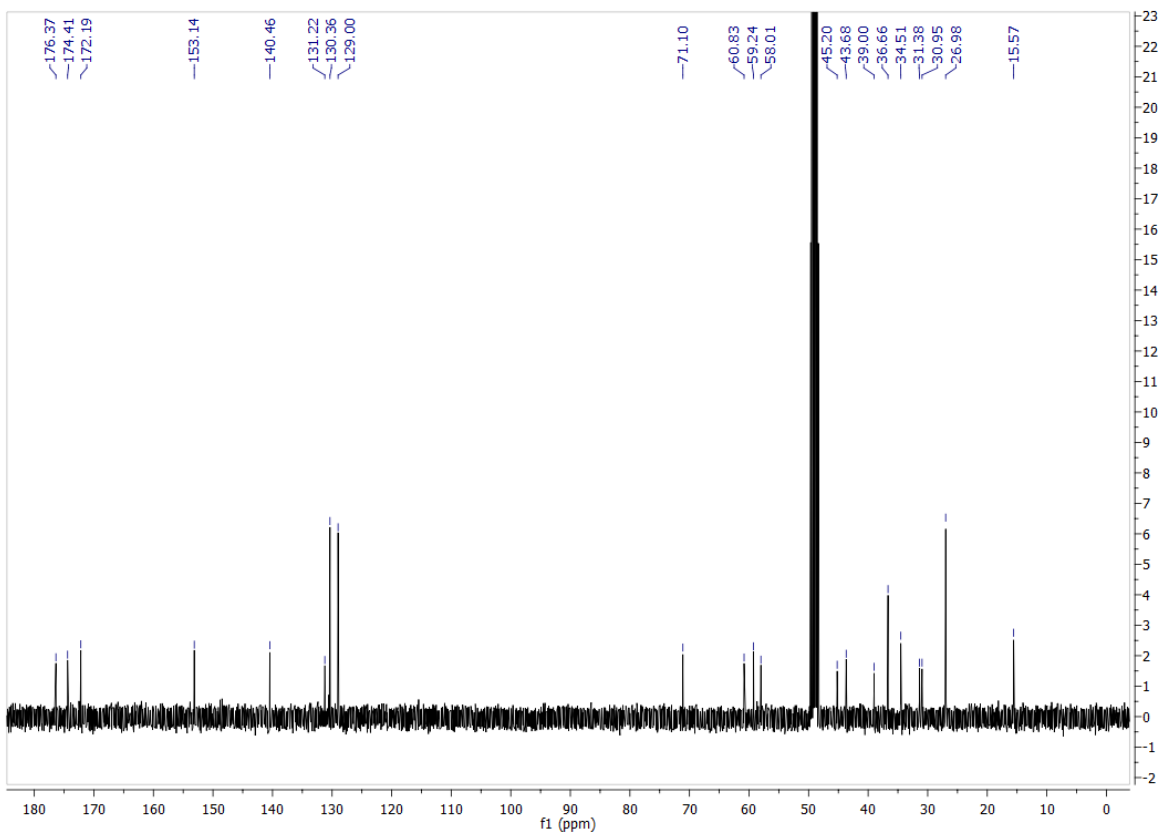

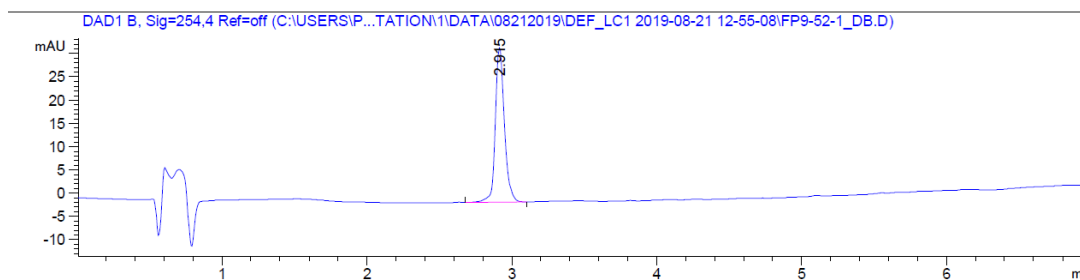

**(2*S*,4*R*)-1-((2*S*)-3,3-dimethyl-2-(pyrrolidine-3-carboxamido)butanoyl)-4-hydroxy-*N*-(4-(4-methylthiazol-5-yl)benzyl)pyrrolidine-2-carboxamide 2,2,2-trifluoroacetate, (4)**

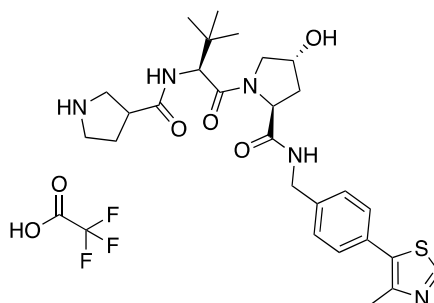

To a flask was added 1-(*tert*-butoxycarbonyl)pyrrolidine-3-carboxylic acid (20.7 mg, 96  $\mu$ mol, 2.0 equiv), DIPEA (24  $\mu$ L, 0.14 mmol, 2.9 equiv), TBTU (24 mg, 74  $\mu$ mol, 1.6 equiv) in DMF (0.55 mL), followed by addition of (2*S*,4*R*)-1-((*S*)-2-amino-3,3-dimethylbutanoyl)-4-hydroxy-*N*-(4-(4-methylthiazol-5-yl)benzyl)pyrrolidine-2-carboxamide 2,2,2-trifluoroacetate (26 mg, 47  $\mu$ mol, 1.0 equiv). The reaction was stirred at room temperature for 16 hr, concentrated *in vacuo* and purified by column chromatography (silica, 0-10% MeOH in  $\text{CH}_2\text{Cl}_2$ ). The reaction was telescoped into the *N*-Boc deprotection with 20% TFA in  $\text{CH}_2\text{Cl}_2$  (2 mL), concentrated *in vacuo* and purified by reverse phase column chromatography (C18, 0-100% MeCN in  $\text{H}_2\text{O}$ , 0.1% TFA). The product was concentrated to yield the desired product as a clear oil (2*S*,4*R*)-1-((2*S*)-3,3-dimethyl-2-(pyrrolidine-3-carboxamido)butanoyl)-4-hydroxy-*N*-(4-(4-methylthiazol-5-yl)benzyl)pyrrolidine-2-carboxamide 2,2,2-trifluoroacetate (**4**) (12.1 mg, 40.3%) over two steps.

$^1\text{H}$  NMR ( $\text{CD}_3\text{OD}-d_4$ , 400 MHz)  $\delta$  8.10 (dd,  $J = 12.9, 8.7$  Hz, 1H), 7.47 – 7.35 (m, 4H), 4.60 – 4.43 (m, 4H), 4.32 (dd,  $J = 15.5, 3.6$  Hz, 1H), 3.88 (d,  $J = 10.9$  Hz, 1H), 3.76 (dd,  $J = 10.9, 3.7$  Hz, 1H), 3.50 – 3.40 (m, 1H), 3.40 – 3.33 (m, 2H), 2.43 (s, 3H), 2.35 – 2.22 (m, 1H), 2.24 – 2/15 (m, 1H), 2.14 – 2.00 (m, 2H), 1.36 – 1.32 (m, 2H), 1.02 (s, 9H).  $^{13}\text{C}$  NMR ( $\text{CD}_3\text{OD}-d_4$ , 101 MHz)  $\delta$  174.35, 174.01, 173.99, 172.02, 140.34, 131.35, 130.51, 130.31, 129.44, 128.93, 71.06, 60.74, 59.52, 59.30, 57.87, 46.48, 46.40, 43.62, 43.38, 43.27, 39.01, 36.50, 36.32, 30.48, 30.07, 26.94, 26.91, 18.62, 17.19, 15.66. Extra carbon peaks observed due to diastomeric mixture. LCMS: expected mass for  $[\text{M}+\text{H}]^+$  ( $\text{C}_{27}\text{H}_{38}\text{N}_5\text{O}_4\text{S}$ ) requires 528.26 m/z, found 528.20 m/z.

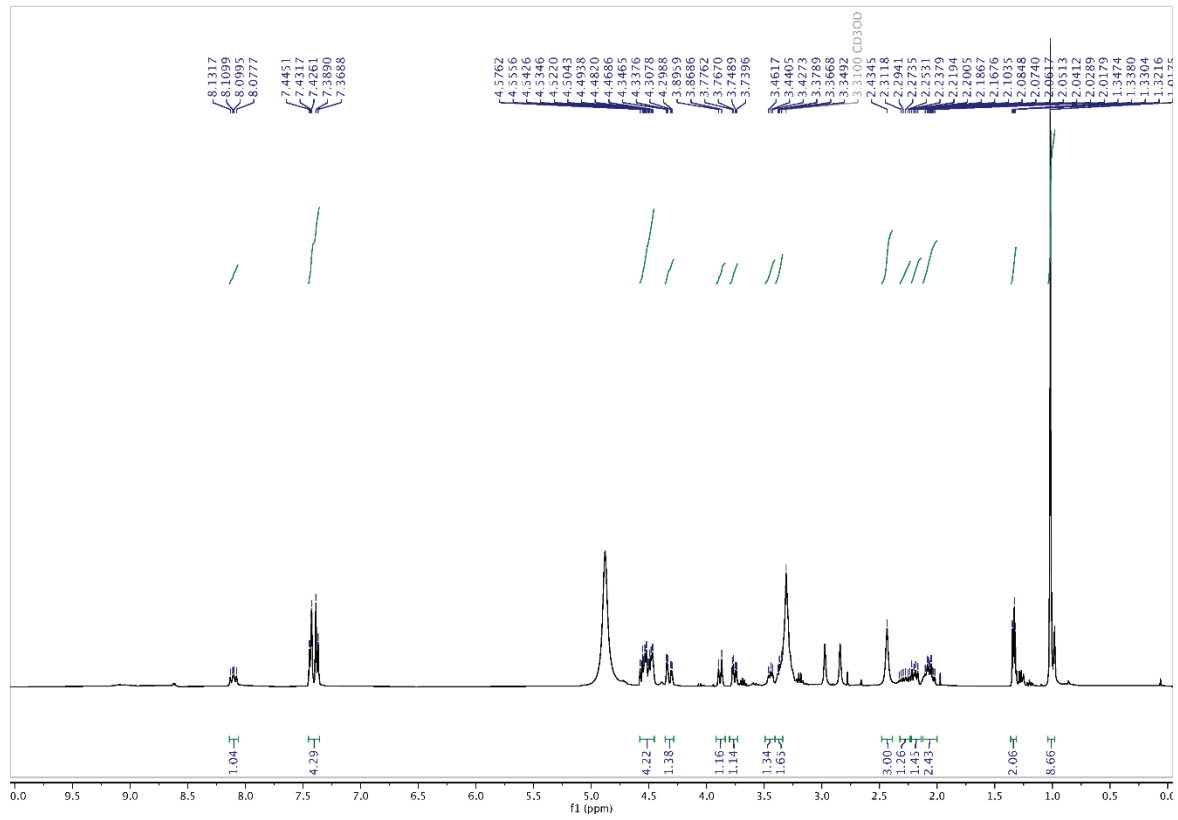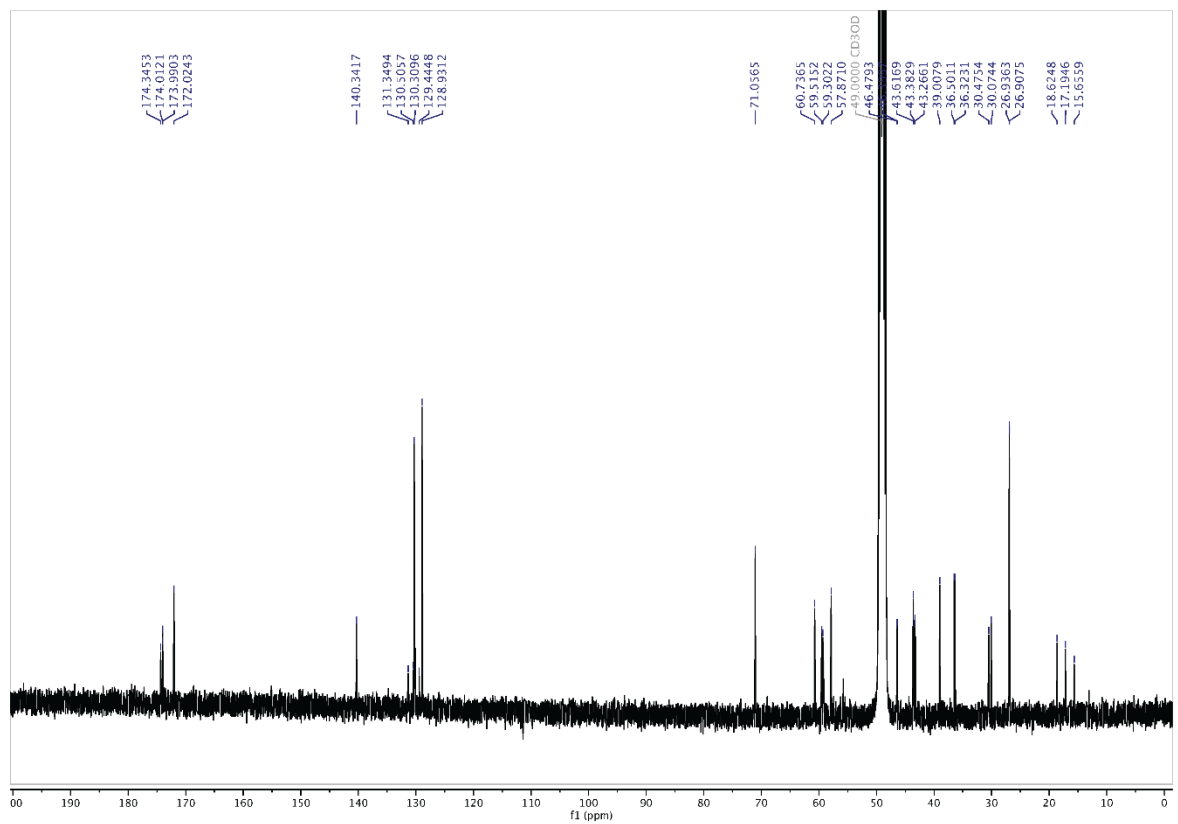

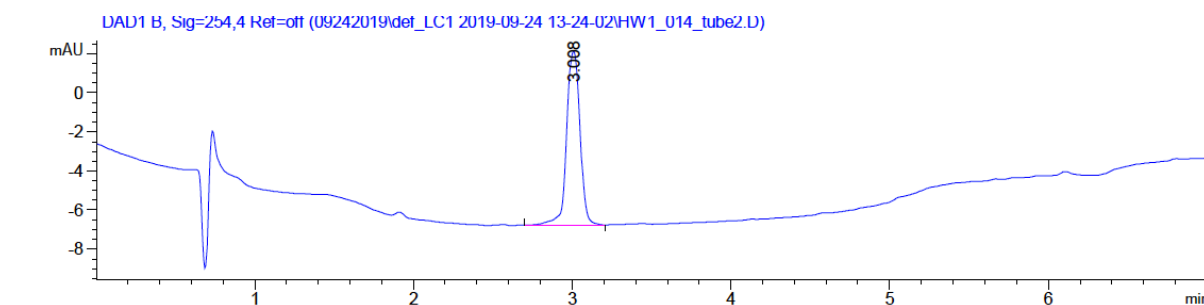

***N*-((*S*)-1-((*2S,4R*)-4-hydroxy-2-((4-(4-methylthiazol-5-yl)benzyl)carbamoyl)pyrrolidin-1-yl)-3,3-dimethyl-1-oxobutan-2-yl)piperidine-4-carboxamide 2,2,2-trifluoroacetate (**5**)**

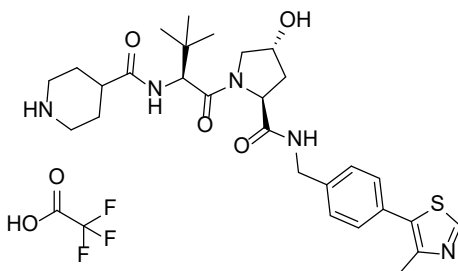

To a flask was added 1-(*tert*-butoxycarbonyl)piperidine-4-carboxylic acid (21 mg, 92  $\mu$ mol, 1.0 equiv), DIPEA (51  $\mu$ L, 0.29 mmol, 3.2 equiv), and TBTU (38 mg, 0.12 mmol, 1.3 equiv) in DMF (1.0 mL), followed by addition of (*2S,4R*)-1-((*S*)-2-amino-3,3-dimethylbutanoyl)-4-hydroxy-*N*-(4-(4-methylthiazol-5-yl)benzyl)pyrrolidine-2-carboxamide 2,2,2-trifluoroacetate (50 mg, 92  $\mu$ mol, 1.0 equiv). The reaction was stirred at room temperature for 16 hr, concentrated *in vacuo* and purified by column chromatography (silica, 0-10% MeOH in  $\text{CH}_2\text{Cl}_2$ ). The reaction was telescoped into the *N*-Boc deprotection with 20% TFA in  $\text{CH}_2\text{Cl}_2$  (2 mL), concentrated *in vacuo* and purified by reverse phase column chromatography (C18, 0-100% MeCN in  $\text{H}_2\text{O}$ , 0.1% TFA). The product was concentrated to yield the desired product as a clear oil *N*-((*S*)-1-((*2S,4R*)-4-hydroxy-2-((4-(4-methylthiazol-5-yl)benzyl)carbamoyl)pyrrolidin-1-yl)-3,3-dimethyl-1-oxobutan-2-yl)piperidine-4-carboxamide 2,2,2-trifluoroacetate (**5**) (35 mg, 58 %) over two steps.

$^1\text{H}$  NMR ( $\text{CD}_3\text{OD}-d_4$ , 400 MHz):  $\delta$  9.08 (s, 1H), 7.51 – 7.41 (m, 4H), 4.64 – 4.49 (m, 4H), 4.36 (d,  $J$  = 15.53 Hz, 1H), 3.88 (d,  $J$  = 11.08 Hz, 1H), 3.81 (dd,  $J$  = 3.82, 10.97 Hz, 1H), 3.47 – 3.40 (m, 2H), 3.02 (qd,  $J$  = 12.9, 3.3 Hz, 2H), 2.74 – 2.65 (m, 1H), 2.50 (s, 3H), 2.27 – 2.19 (m, 1H), 2.13 – 2.04 (m, 1H), 2.03 – 1.83 (m, 4H), 1.04 (s, 9H).  $^{13}\text{C}$  NMR ( $\text{CD}_3\text{OD}-d_4$ , 101 MHz):  $\delta$  175.55, 174.42, 172.10, 153.52, 147.83, 147.78, 140.71, 130.88, 130.37, 129.06, 71.09, 60.84, 58.97, 58.02, 44.40, 44.32, 43.68, 40.51, 39.06, 36.72, 27.18, 26.98, 26.27, 15.28. LCMS: expected mass for  $[\text{M}+\text{H}]^+$  ( $\text{C}_{28}\text{H}_{40}\text{N}_5\text{O}_4\text{S}$ ) requires 542.27 m/z, found 542.20 m/z.

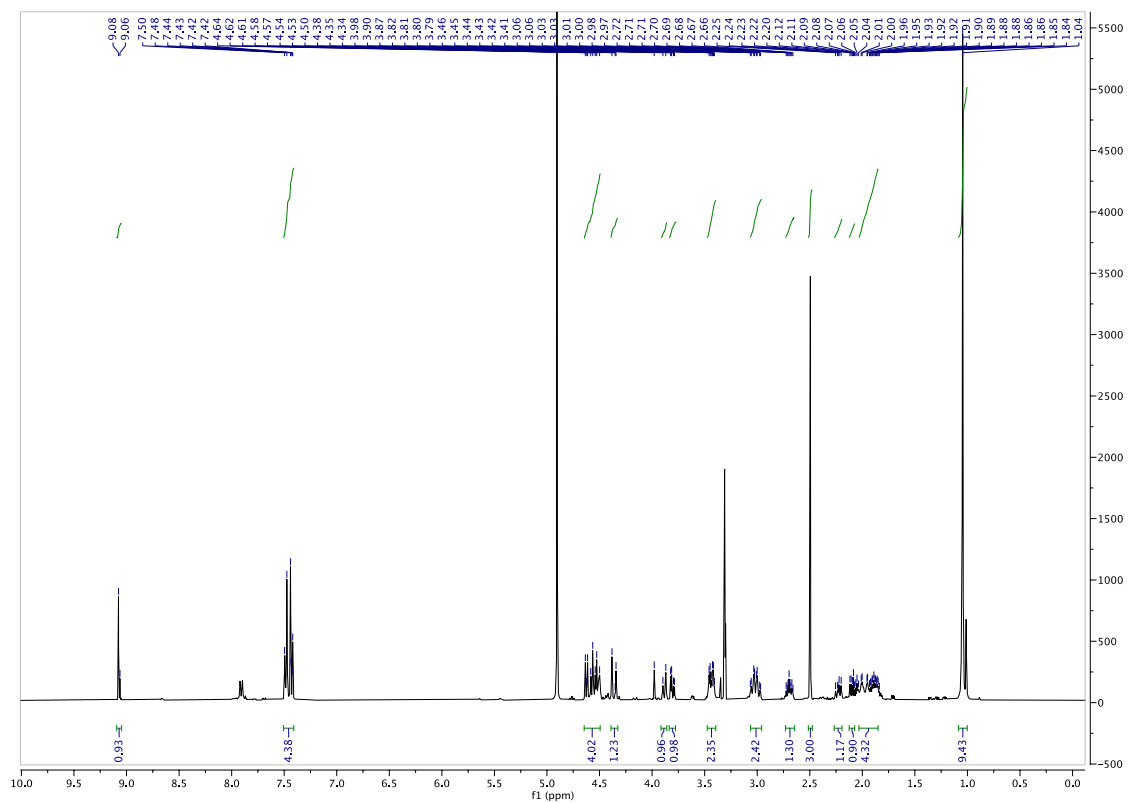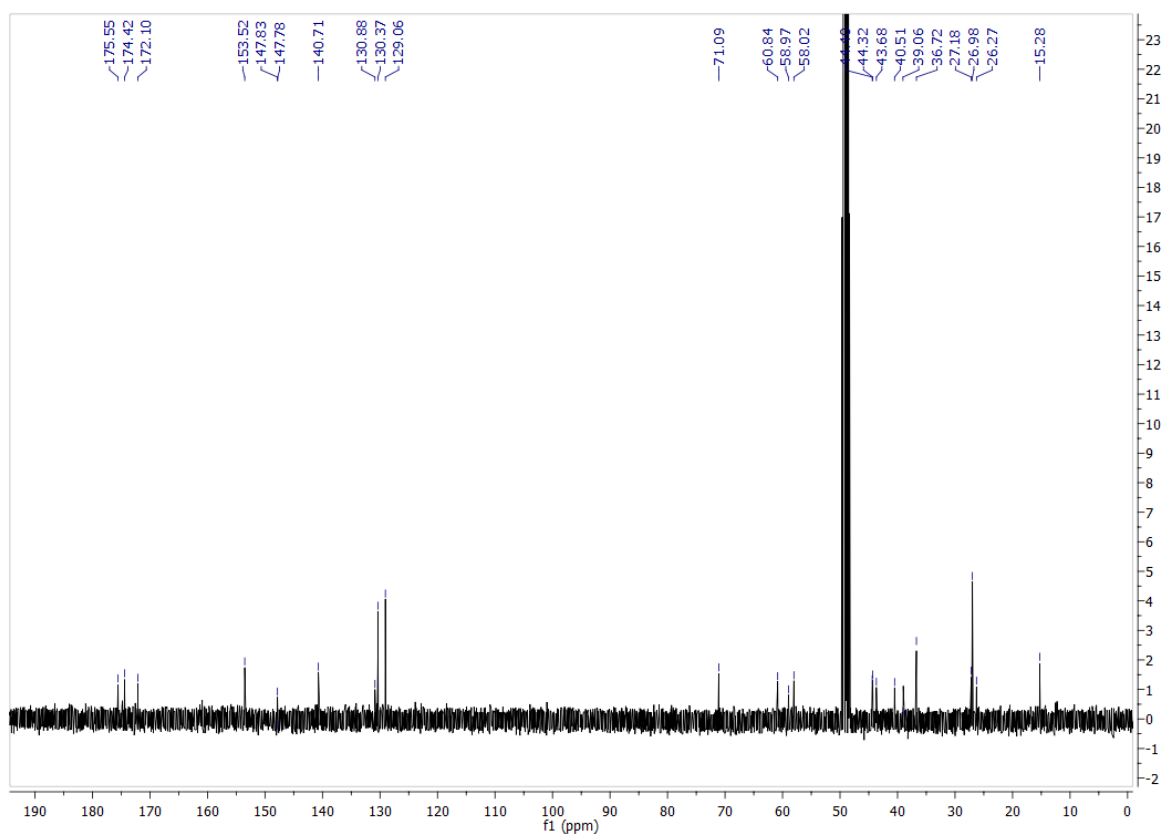



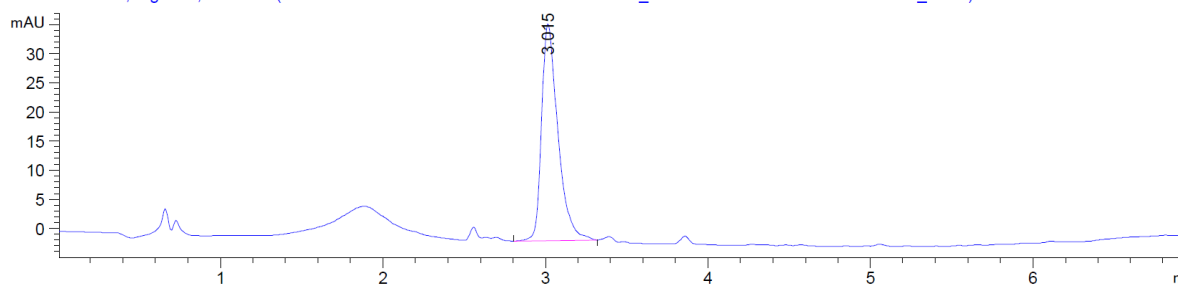

***N*-((*S*)-1-((2*S*,4*R*)-4-hydroxy-2-((4-(4-methylthiazol-5-yl)benzyl)carbamoyl)pyrrolidin-1-yl)-3,3-dimethyl-1-oxobutan-2-yl)piperidine-3-carboxamide 2,2,2-trifluoroacetate (**6**)**

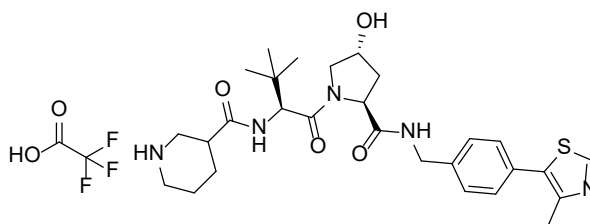

To a flask was added 1-(*tert*-butoxycarbonyl)piperidine-3-carboxylic acid (13.8 mg, 60  $\mu$ mol, 1.0 equiv), DIPEA (24  $\mu$ L, 0.14 mmol, 2.9 equiv), and TBTU (21.5 mg, 67  $\mu$ mol, 1.42 equiv) in DMF (0.55 mL), followed by addition of (2*S*,4*R*)-1-((*S*)-2-amino-3,3-dimethylbutanoyl)-4-hydroxy-*N*-(4-(4-methylthiazol-5-yl)benzyl)pyrrolidine-2-carboxamide 2,2,2-trifluoroacetate (25.6 mg, 47  $\mu$ mol, 1.0 equiv). The reaction was stirred at room temperature for 21 hr, concentrated *in vacuo* and purified by column chromatography (silica, 0-10% MeOH in  $\text{CH}_2\text{Cl}_2$ ). The reaction was telescoped into the *N*-Boc deprotection with 20% TFA in  $\text{CH}_2\text{Cl}_2$  (2 mL), concentrated *in vacuo* and purified by reverse phase column chromatography (C18, 0-100% MeCN in  $\text{H}_2\text{O}$ , 0.1% TFA). The product was concentrated to yield the desired product as a clear oil *N*-((*S*)-1-((2*S*,4*R*)-4-hydroxy-2-((4-(4-methylthiazol-5-yl)benzyl)carbamoyl)pyrrolidin-1-yl)-3,3-dimethyl-1-oxobutan-2-yl)piperidine-3-carboxamide 2,2,2-trifluoroacetate (**6**) (14.2 mg, 46 %) over two steps.

$^1\text{H}$  NMR ( $\text{CD}_3\text{OD}-d_4$ , 400 MHz):  $\delta$  8.96 (s, 1H), 7.51 – 7.39 (m, 4H), 4.64 – 4.49 (m, 4H), 4.36 (dd,  $J$  = 6.51, 15.52 Hz, 1H), 3.99 – 3.90 (m, 1H), 3.24 (t,  $J$  = 5.69 Hz, 2H), 3.20 – 3.06 (m, 2H), 3.13 – 3.08 (m, 1H), 2.95 – 2.86 (m, 1H), 2.48 (s, 3H), 2.27 – 2.20 (m, 1H), 2.13 – 2.05 (m, 2H), 1.88 – 1.70 (m, 3H), 1.05 (app d, 9H).  $^{13}\text{C}$  NMR ( $\text{CD}_3\text{OD}-d_4$ , 101 MHz):  $\delta$  174.69, 174.59, 174.42, 174.40, 172.15, 172.07, 153.24, 140.48, 131.19, 130.36, 130.34, 129.01, 129.00, 71.16, 71.11, 60.80, 59.43, 58.91, 57.93, 55.81, 46.33, 46.10, 45.11, 45.02, 43.76, 43.69, 43.66, 39.22, 39.10, 39.06, 39.00, 36.62, 36.22, 27.70, 27.01, 26.96, 21.90, 21.70, 18.69, 17.26, 15.53, 13.12. Extra carbon peaks observed due to diastereomeric mixture. LCMS: expected mass for  $[\text{M}+\text{H}]^+$  ( $\text{C}_{28}\text{H}_{40}\text{N}_5\text{O}_4\text{S}$ ) requires 542.27  $m/z$ , found 542.20  $m/z$ . Diastereoisomer A Retention time: 2.966 min; Diastereoisomer B Retention time: 3.080 min.

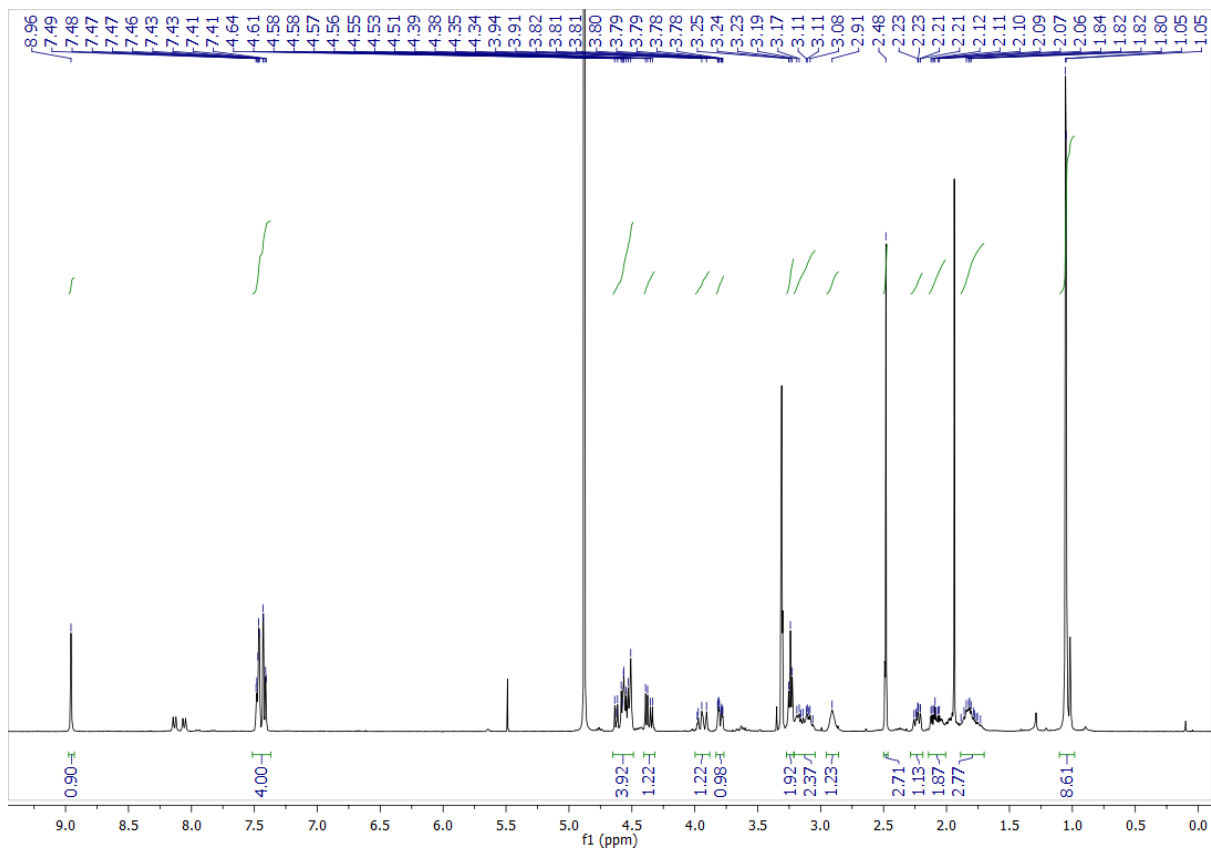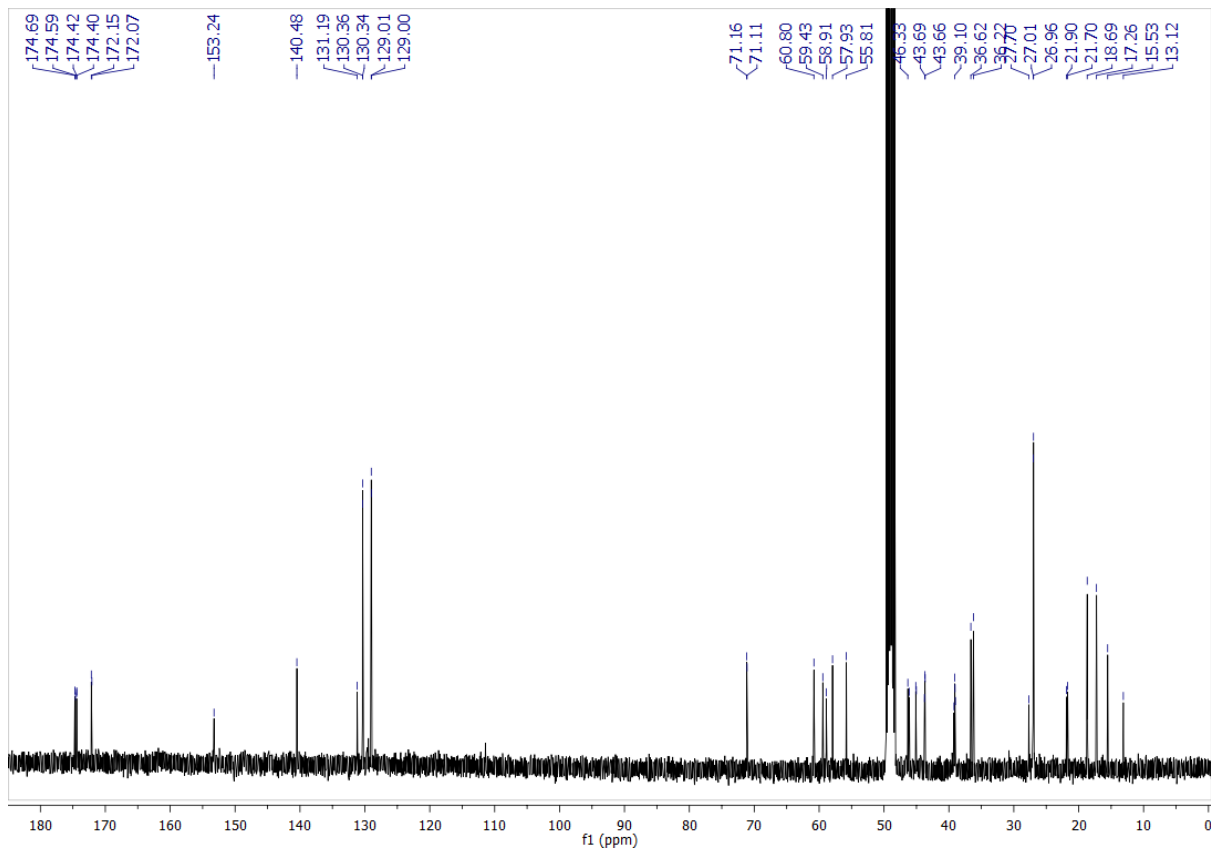

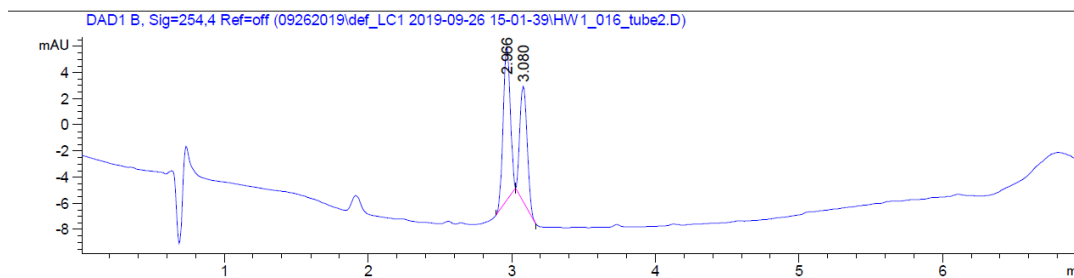

**4-fluoro-*N*-((*S*)-1-((2*S*,4*R*)-4-hydroxy-2-((4-(4-methylthiazol-5-yl)benzyl)carbamoyl)pyrrolidin-1-yl)-3,3-dimethyl-1-oxobutan-2-yl)piperidine-4-carboxamide 2,2,2-trifluoroacetate (**7**)**

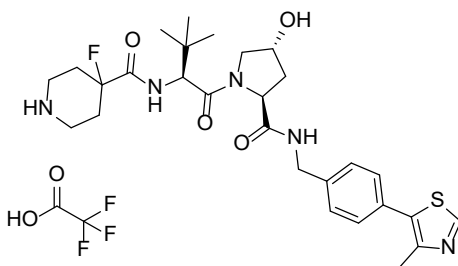

To a flask was added 1-(*tert*-butoxycarbonyl)-4-fluoropiperidine-4-carboxylic acid (12mg, 50  $\mu$ mol, 1.1 equiv), DIPEA (26  $\mu$ L, 0.15 mmol, 3.2 equiv), and TBTU (19 mg, 60  $\mu$ mol, 1.3 equiv) in DMF (1 mL), followed by addition of (2*S*,4*R*)-1-((*S*)-2-amino-3,3-dimethylbutanoyl)-4-hydroxy-*N*-(4-(4-methylthiazol-5-yl)benzyl)pyrrolidine-2-carboxamide 2,2,2-trifluoroacetate (25 mg, 46  $\mu$ mol, 1.0 equiv). The reaction was stirred at room temperature for 21 hr, concentrated *in vacuo* and purified by column chromatography (silica, 0-10% MeOH in  $\text{CH}_2\text{Cl}_2$ ). The reaction was telescoped into the *N*-Boc deprotection with 20% TFA in  $\text{CH}_2\text{Cl}_2$  (2 mL), concentrated *in vacuo* and purified by reverse phase column chromatography (C18, 0-100% MeCN in  $\text{H}_2\text{O}$ , 0.1% TFA). The product was concentrated to yield the desired product as a clear oil 4-fluoro-*N*-((*S*)-1-((2*S*,4*R*)-4-hydroxy-2-((4-(4-methylthiazol-5-yl)benzyl)carbamoyl)pyrrolidin-1-yl)-3,3-dimethyl-1-oxobutan-2-yl)piperidine-4-carboxamide 2,2,2-trifluoroacetate (**7**) (17.7 mg, 57 %) over two steps.

$^1\text{H}$  NMR ( $\text{CD}_3\text{OD}-d_4$ , 400 MHz):  $\delta$  9.11 (s, 1H), 7.50 – 7.43 (m, 4H), 4.69 (d,  $J$  = 8.55 Hz, 1H), 4.62 – 4.55 (m, 1H), 4.56 – 4.50 (m, 1H), 4.36 (d,  $J$  = 15.50 Hz, 1H), 3.87 – 3.78 (m, 2H), 3.49 – 3.41 (m, 2H), 3.29 – 3.20 (m, 2H), 2.50 (s, 3H), 2.45 – 2.06 (m, 7H), 1.04 (s, 9H).  $^{13}\text{C}$  NMR ( $\text{CD}_3\text{OD}-d_4$ , 101 MHz):  $\delta$  174.25, 171.49, 153.65, 140.76, 130.76, 130.58, 130.40, 129.68, 129.05, 129.03, 71.06, 60.89, 58.59, 58.19, 43.69, 40.66, 39.05, 37.44, 26.86, 26.81, 26.78, 15.17. LCMS: expected mass for  $[\text{M}+\text{H}]^+$  ( $\text{C}_{28}\text{H}_{39}\text{N}_5\text{O}_4\text{S}$ ) requires 560.26 m/z, found 560.20 m/z.

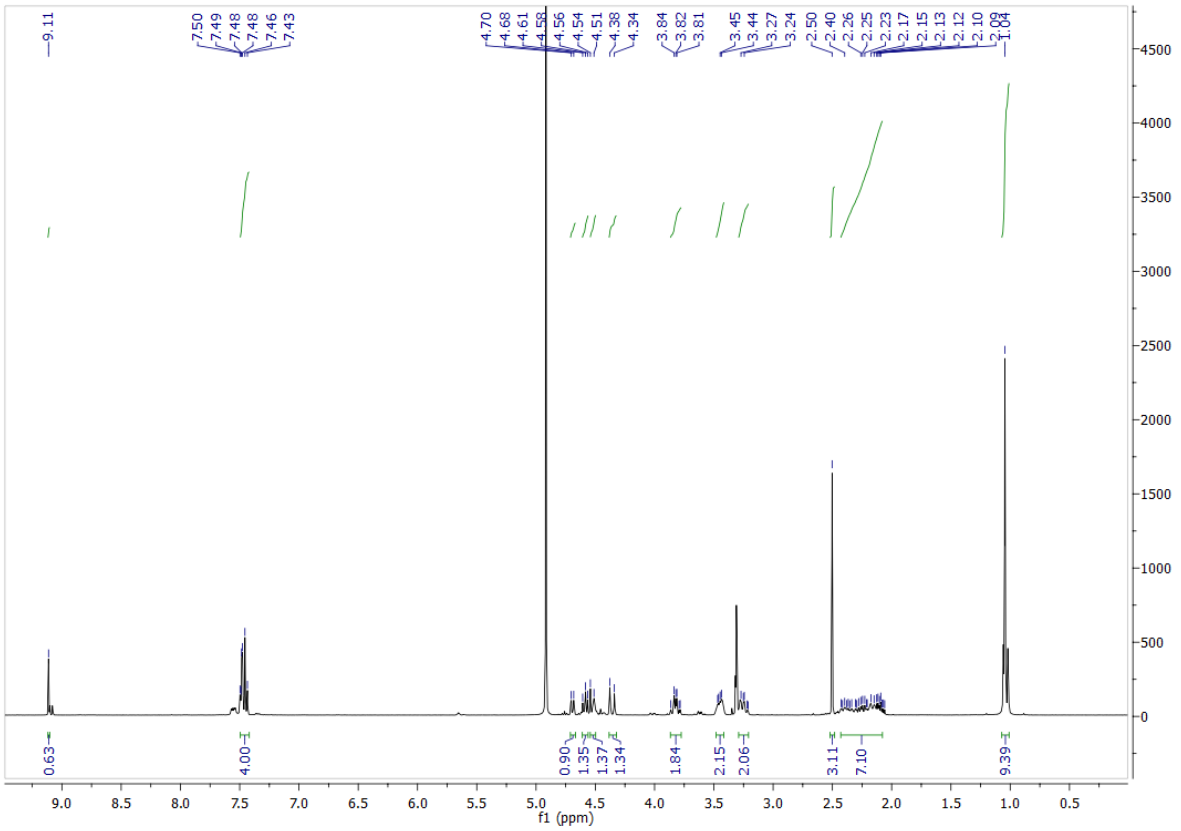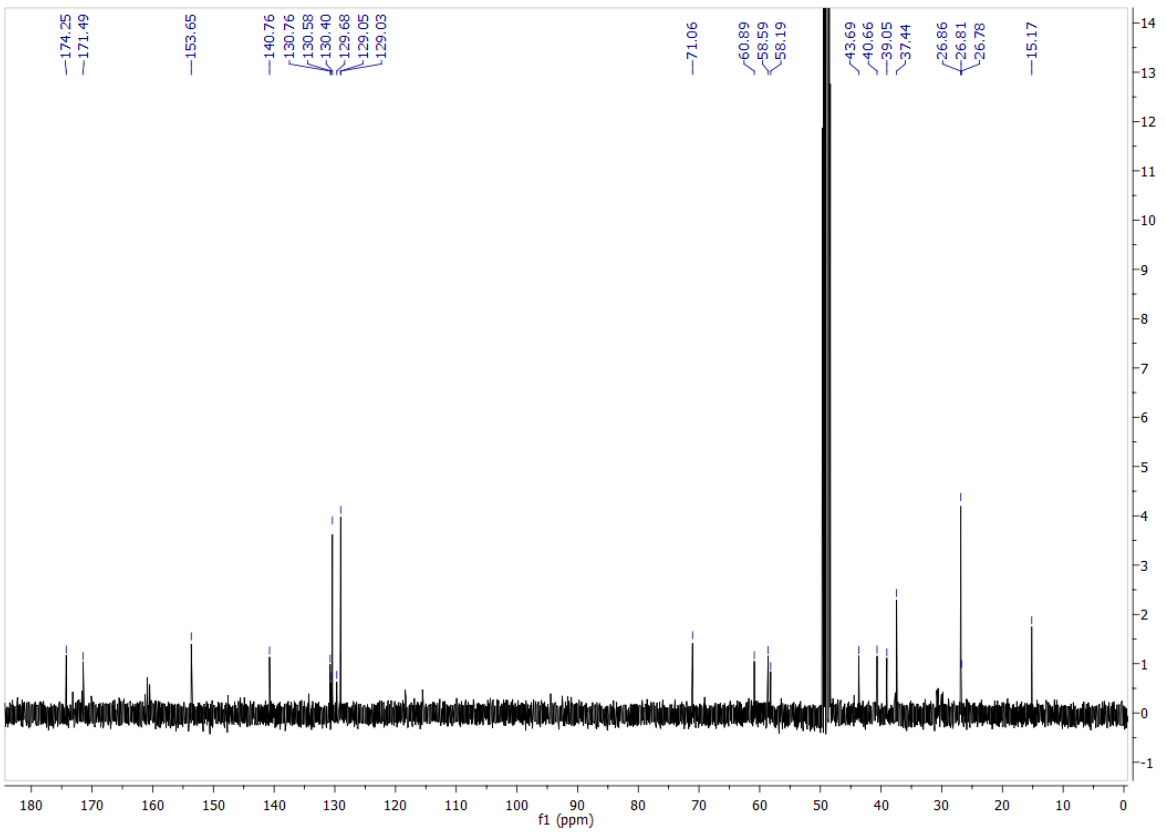

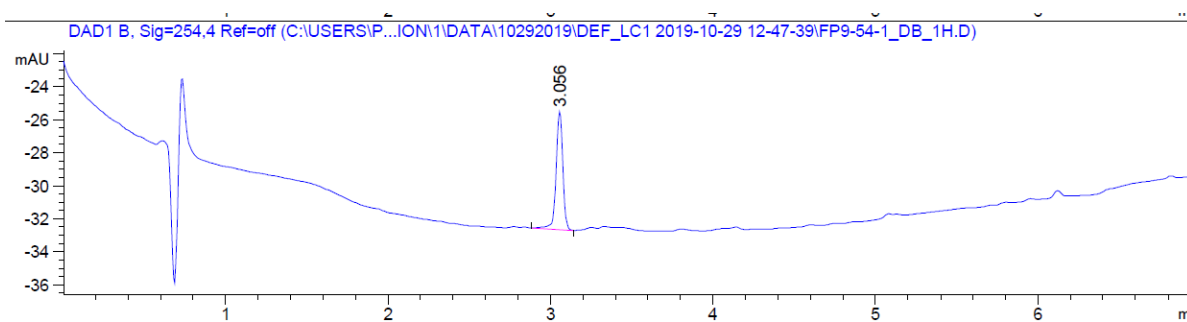

**8-bromo-*N*-(furan-2-ylmethyl)-[1,2,4]triazolo[4,3-*c*]pyrimidin-5-amine, 8**

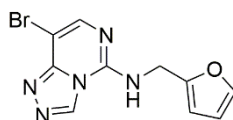

Synthesized as previously reported.<sup>1</sup>

**4-(5-((furan-2-ylmethyl)amino)-[1,2,4]triazolo[4,3-*c*]pyrimidin-8-yl)benzoic acid, 9**

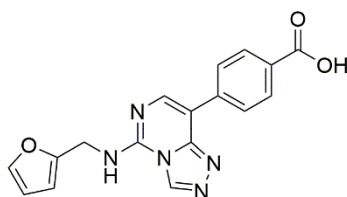

Synthesized as previously reported.<sup>1</sup>

**(2*S*,4*R*)-1-((*S*)-2-(3-(4-(5-((furan-2-ylmethyl)amino)-[1,2,4]triazolo[4,3-*c*]pyrimidin-8-yl)benzamido)cyclobutane-1-carboxamido)-3,3-dimethylbutanoyl)-4-hydroxy-*N*-(4-(4-methylthiazol-5-yl)benzyl)pyrrolidine-2-carboxamide, UNC7327**

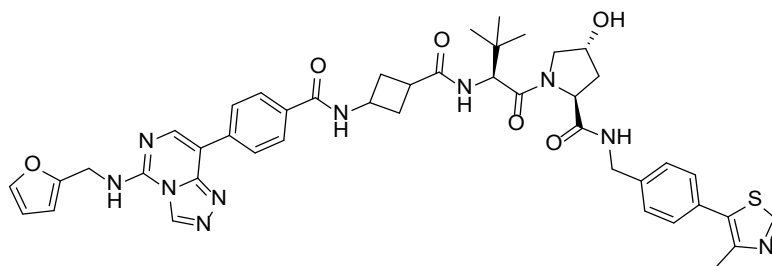

To a flask was added 4-(5-((furan-2-ylmethyl)amino)-[1,2,4]triazolo[4,3-*c*]pyrimidin-8-yl)benzoic acid (**9**) (5.8 mg, 15  $\mu$ mol, 1.0 equiv), DIPEA (7.8  $\mu$ L, 45  $\mu$ mol, 3.0 equiv), and TBTU (6.2 mg, 19  $\mu$ mol, 1.3 equiv) in DMF (1 mL), followed by addition of (2*S*,4*R*)-1-((*S*)-2-(3-aminocyclobutane-1-carboxamido)-3,3-dimethylbutanoyl)-4-hydroxy-*N*-(4-(4-methylthiazol-5-yl)benzyl)pyrrolidine-2-carboxamide 2,2,2-trifluoroacetate (9.6 mg, 15  $\mu$ mol, 1.0 equiv). The reaction was stirred at room temperature for 16 hr, concentrated *in vacuo* and purified by reverse phase high performance liquid chromatography (C18, 0-100% MeCN in H<sub>2</sub>O, 0.1% TFA). The product was concentrated to yield the desired product as a white

solid (2*S*,4*R*)-1-((*S*)-2-(3-(4-(5-((furan-2-ylmethyl)amino)-[1,2,4]triazolo[4,3-*c*]pyrimidin-8-yl)benzamido)cyclobutane-1-carboxamido)-3,3-dimethylbutanoyl)-4-hydroxy-*N*-(4-(4-methylthiazol-5-yl)benzyl)pyrrolidine-2-carboxamide (2.66 mg, 21 %).

<sup>1</sup>H NMR (CD<sub>3</sub>OD-*d*<sub>4</sub>, 400 MHz): δ 9.35 (s, 1H), 9.07 (s, 1H), 8.14 (d, *J* = 2.76 Hz, 1H), 8.00 – 7.93 (m, 4H), 7.53 – 7.41 (m, 5H), 6.46 – 6.39 (m, 2H), 4.79 – 4.71 (m, 1H), 4.71 – 4.64 (m, 1H), 4.62 – 4.55 (m, 2H), 4.55 – 4.46 (m, 2H), 4.36 (dd, *J* = 4.67, 15.59 Hz, 1H), 3.95 (dd, *J* = 11.27, 16.40 Hz, 1H), 3.86 – 3.79 (m, 1H), 3.25 – 3.17 (m, 1H), 3.03 – 2.95 (m, 1H), 2.67 – 2.54 (m, 2H), 2.50 (s, 3H), 2.46 – 2.37 (m, 1H), 2.35 – 2.28 (m, 1H), 2.27 – 2.19 (m, 1H), 2.14 – 2.05 (m, 1H), 1.05 (app d, *J* = 4.37 Hz, 9H). LCMS: expected mass for [M+H]<sup>+</sup> (C<sub>44</sub>H<sub>49</sub>N<sub>10</sub>O<sub>6</sub>S) requires 845.35 m/z, found 845.20 m/z.

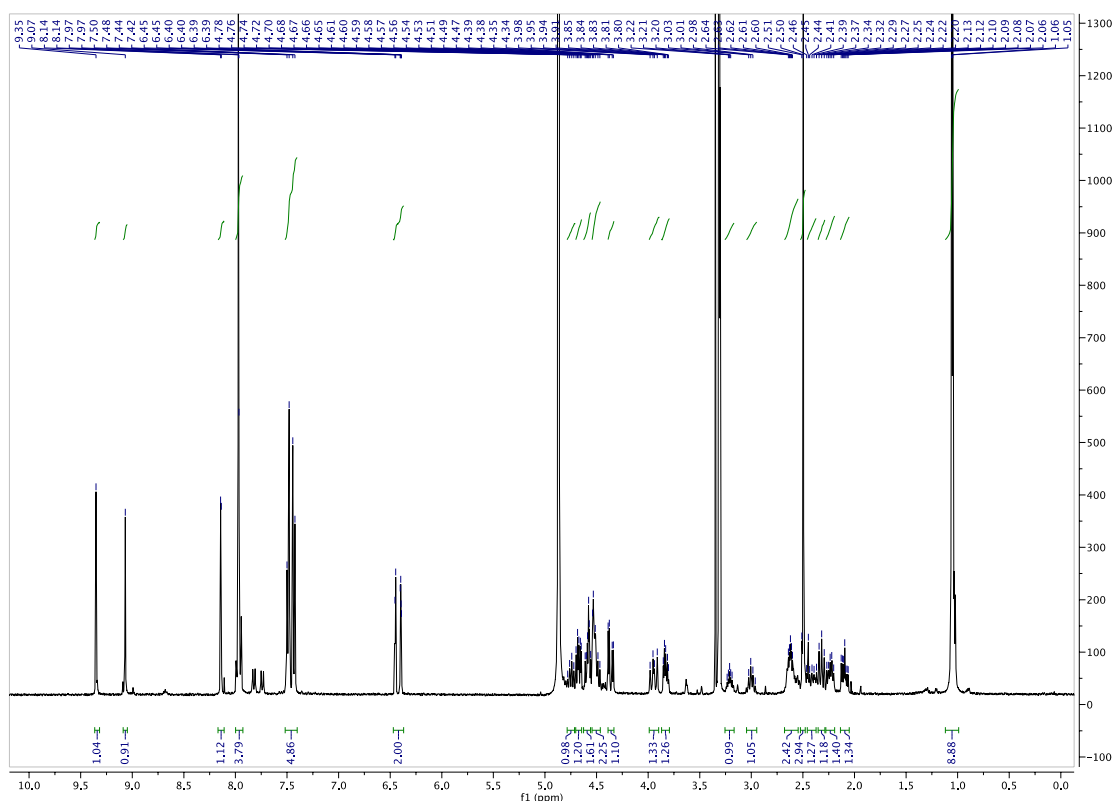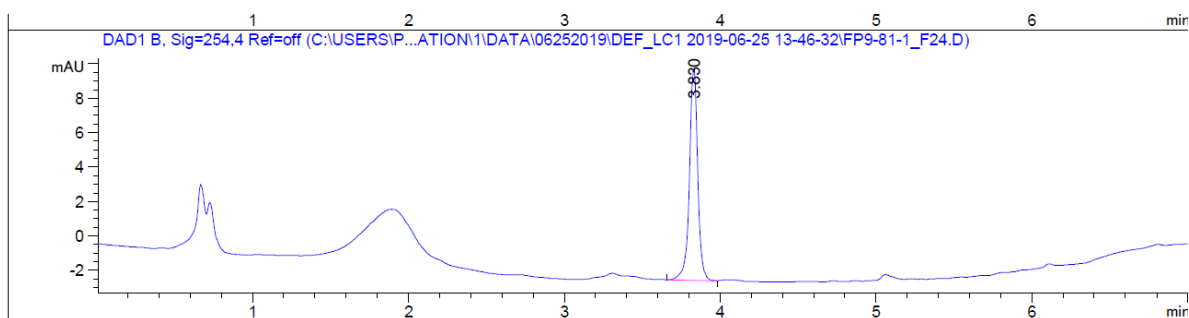

**(2*S*,4*R*)-1-((*S*)-2-((1*S*,3*R*)-3-(4-(5-((furan-2-ylmethyl)amino)-[1,2,4]triazolo[4,3-*c*]pyrimidin-8-yl)benzamido)cyclobutane-1-carboxamido)-3,3-dimethylbutanoyl)-4-hydroxy-*N*-(4-(4-methylthiazol-5-yl)benzyl)pyrrolidine-2-carboxamide, UNC7700**

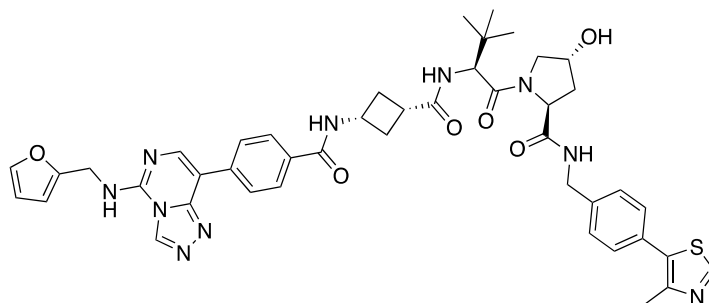

To a flask was added 4-(5-((furan-2-ylmethyl)amino)-[1,2,4]triazolo[4,3-*c*]pyrimidin-8-yl)benzoic acid (**9**) (5 mg, 15  $\mu$ mol, 1.0 equiv), DIPEA (7.8  $\mu$ L, 45  $\mu$ mol, 3.0 equiv), and TBTU (6.2 mg, 19  $\mu$ mol, 1.3 equiv) in DMF (1 mL), followed by addition of (2*S*,4*R*)-1-((*S*)-2-((1*S*,3*R*)-3-aminocyclobutane-1-carboxamido)-3,3-dimethylbutanoyl)-4-hydroxy-*N*-(4-(4-methylthiazol-5-yl)benzyl)pyrrolidine-2-carboxamide 2,2,2-trifluoroacetate (9.6 mg, 15  $\mu$ mol, 1.0 equiv). The reaction was stirred at room temperature for 16 hr, concentrated *in vacuo* and purified by reverse phase high performance liquid chromatography (C18, 0-100% MeCN in H<sub>2</sub>O, 0.1% TFA). The product was concentrated to yield the desired product as a white solid (2*S*,4*R*)-1-((*S*)-2-((1*S*,3*R*)-3-(4-(5-((furan-2-ylmethyl)amino)-[1,2,4]triazolo[4,3-*c*]pyrimidin-8-yl)benzamido)cyclobutane-1-carboxamido)-3,3-dimethylbutanoyl)-4-hydroxy-*N*-(4-(4-methylthiazol-5-yl)benzyl)pyrrolidine-2-carboxamide (9.54 mg, 76 %).

<sup>1</sup>H NMR (CD<sub>3</sub>OD-*d*<sub>4</sub>, 400 MHz):  $\delta$  9.37 (s, 1H), 9.14 (s, 1H), 8.16 (s, 1H), 8.00 – 7.91 (m, 4H), 7.52 – 7.40 (m, 5H), 6.47 – 6.38 (m, 2H), 4.87 (s, 2H), 4.66 (s, 1H), 4.61 – 4.55 (m, 1H), 4.55 – 4.46 (m, 3H), 4.36 (d, *J* = 15.56 Hz, 1H), 3.93 (d, *J* = 11.00 Hz, 1H), 3.82 (dd, *J* = 3.86, 10.95 Hz, 1H), 3.05 – 2.95 (m, 1H), 2.67 – 2.61 (m, 1H), 2.58 – 2.53 (m, 1H), 2.50 (s, 3H), 2.36 – 2.28 (m, 2H), 2.27 – 2.19 (m, 1H), 2.15 – 2.04 (m, 1H), 1.05 (s, 9H). <sup>13</sup>C NMR (CD<sub>3</sub>OD-*d*<sub>4</sub>, 101 MHz)  $\delta$  174.88, 173.04, 170.80, 167.39, 152.00, 150.58, 148.49, 146.49, 143.88, 143.86, 142.36, 139.22, 135.95, 133.34, 132.65, 129.47, 128.92, 127.59, 127.52, 127.34, 110.47, 110.12, 107.95, 69.68, 59.41, 57.74, 56.59, 42.25, 41.10, 37.96, 37.56, 35.28, 33.24, 32.66, 32.29, 25.58. LCMS: expected mass for [M+H]<sup>+</sup> (C<sub>44</sub>H<sub>49</sub>N<sub>10</sub>O<sub>6</sub>S) requires 845.35 m/z, found 845.30 m/z.

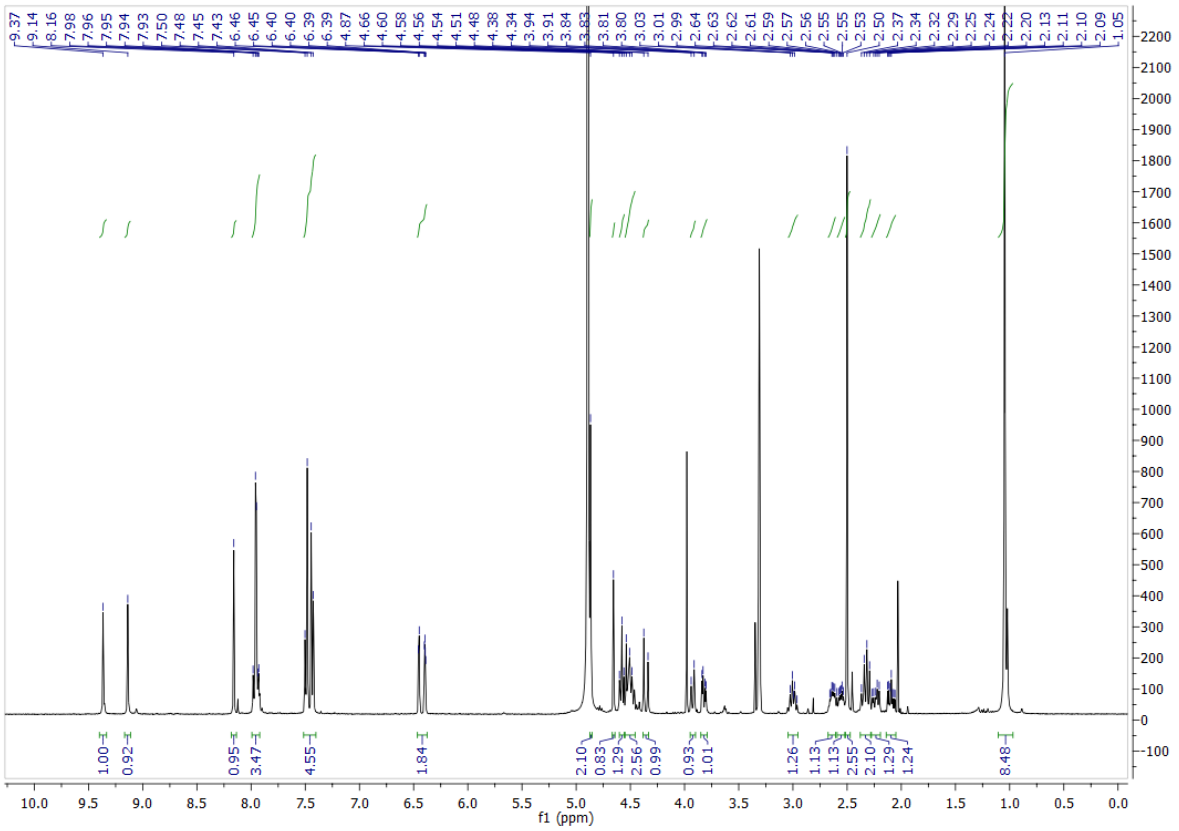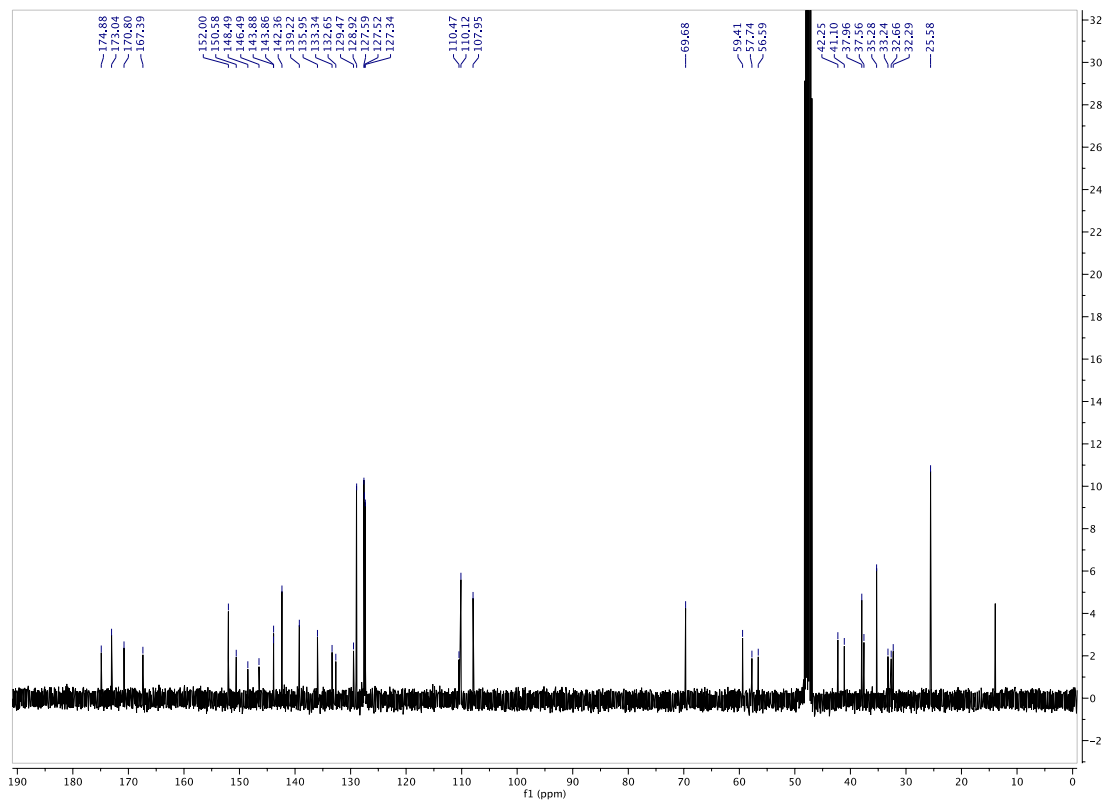



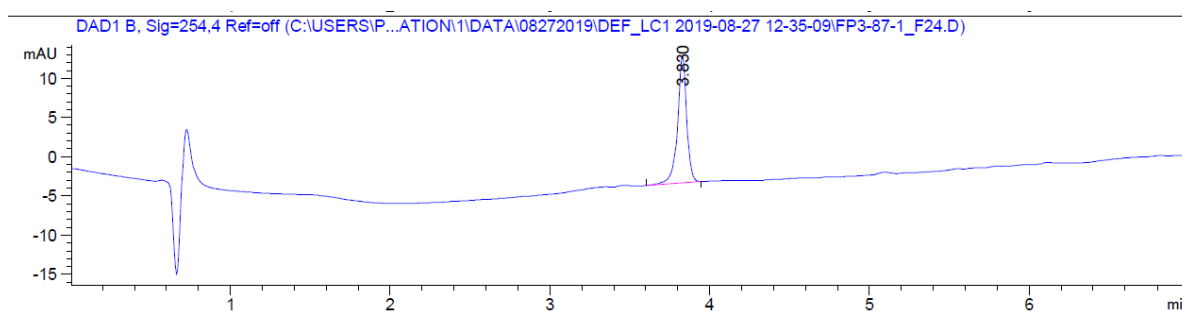

**(2*S*,4*R*)-1-((*S*)-2-((1*R*,3*S*)-3-(4-(5-((furan-2-ylmethyl)amino)-[1,2,4]triazolo[4,3-*c*]pyrimidin-8-yl)benzamido)cyclobutane-1-carboxamido)-3,3-dimethylbutanoyl)-4-hydroxy-*N*-(4-(4-methylthiazol-5-yl)benzyl)pyrrolidine-2-carboxamide, UNC7698**

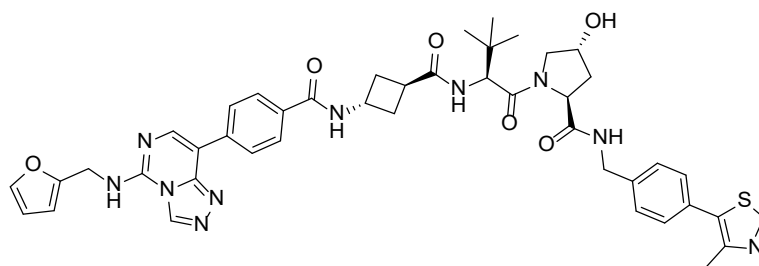

To a flask was added 4-(5-((furan-2-ylmethyl)amino)-[1,2,4]triazolo[4,3-*c*]pyrimidin-8-yl)benzoic acid (**9**) (5 mg, 15  $\mu$ mol, 1.0 equiv), DIPEA (7.8  $\mu$ L, 45  $\mu$ mol, 3.0 equiv), and TBTU (6.2 mg, 19  $\mu$ mol, 1.3 equiv) in DMF (1 mL), followed by addition of (2*S*,4*R*)-1-((*S*)-2-((1*R*,3*S*)-3-aminocyclobutane-1-carboxamido)-3,3-dimethylbutanoyl)-4-hydroxy-*N*-(4-(4-methylthiazol-5-yl)benzyl)pyrrolidine-2-carboxamide 2,2,2-trifluoroacetate (9.6 mg, 15  $\mu$ mol, 1.0 equiv). The reaction was stirred at room temperature for 16 hr, concentrated *in vacuo* and purified by reverse phase high performance liquid chromatography (C18, 0-100% MeCN in H<sub>2</sub>O, 0.1% TFA). The product was concentrated to yield the desired product as a white solid (2*S*,4*R*)-1-((*S*)-2-((1*R*,3*S*)-3-(4-(5-((furan-2-ylmethyl)amino)-[1,2,4]triazolo[4,3-*c*]pyrimidin-8-yl)benzamido)cyclobutane-1-carboxamido)-3,3-dimethylbutanoyl)-4-hydroxy-*N*-(4-(4-methylthiazol-5-yl)benzyl)pyrrolidine-2-carboxamide (8.04 mg, 64 %).

<sup>1</sup>H NMR (CD<sub>3</sub>OD-*d*<sub>4</sub>, 400 MHz):  $\delta$  9.36 (s, 1H), 9.11 (s, 1H), 8.14 (s, 1H), 7.95 (ap s, 4H), 7.52 – 7.41 (m, 5H), 6.47 – 6.38 (m, 2H), 4.86 (s, 2H), 4.77 – 4.71 (m, 1H), 4.68 (s, 1H), 4.62 – 4.56 (m, 2H), 4.55 – 4.51 (m, 1H), 4.37 (d, *J* = 15.57 Hz, 1H), 3.97 (d, *J* = 11.24 Hz, 1H), 3.83 (dd, *J* = 3.81, 11.00 Hz, 1H), 3.20 (td, *J* = 4.26, 8.79, 8.51 Hz, 1H), 2.66 – 2.58 (m, 2H), 2.50 (s, 3H), 2.46 – 2.36 (m, 2H), 2.24 (dd, *J* = 7.61, 13.11 Hz, 1H), 2.10 (ddd, *J* = 4.46, 9.19, 13.31 Hz, 1H), 1.05 (s, 9H). LCMS: expected mass for [M+H]<sup>+</sup> (C<sub>44</sub>H<sub>49</sub>N<sub>10</sub>O<sub>6</sub>S) requires 845.35 m/z, found 845.30 m/z.

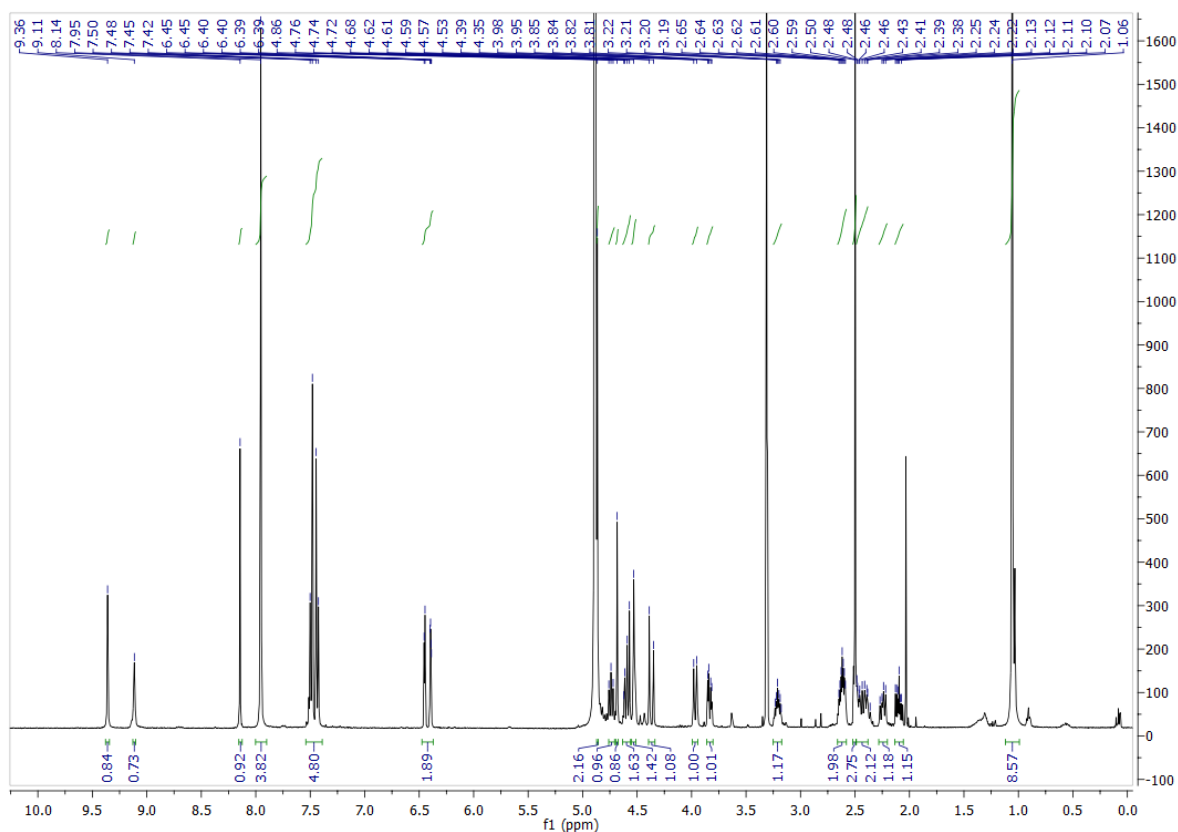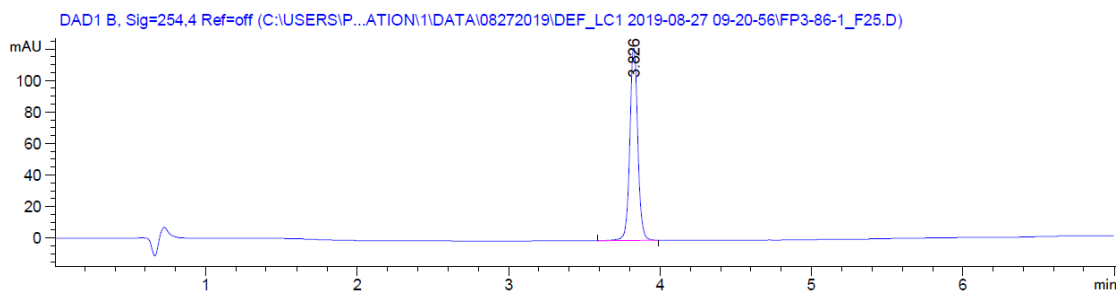

**(2*S*,4*R*)-1-((2*S*)-2-(1-(4-(5-((furan-2-ylmethyl)amino)-[1,2,4]triazolo[4,3-*c*]pyrimidin-8-yl)benzoyl)pyrrolidine-3-carboxamido)-3,3-dimethylbutanoyl)-4-hydroxy-*N*-(4-(4-methylthiazol-5-yl)benzyl)pyrrolidine-2-carboxamide, UNC7701**

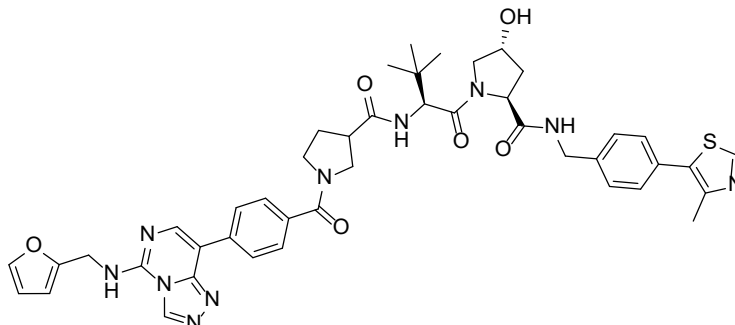

To a flask was added 4-(5-((furan-2-ylmethyl)amino)-[1,2,4]triazolo[4,3-*c*]pyrimidin-8-yl)benzoic acid (**9**) (6.3 mg, 19  $\mu$ mol, 1.0 equiv), DIPEA (9.9  $\mu$ L, 57  $\mu$ mol, 3.0 equiv), and TBTU (7.8 mg, 25  $\mu$ mol, 1.3 equiv) in DMF (0.35 mL), followed by addition of 3-(((*S*)-1-((2*S*,4*R*)-4-hydroxy-2-((4-(4-methylthiazol-5-yl)benzyl)carbamoyl)pyrrolidin-1-yl)-3,3-dimethyl-1-oxobutan-2-yl)carbamoyl)pyrrolidin-1-ium

2,2,2-trifluoroacetate (12.1 mg, 19  $\mu$ mol, 1.0 equiv). The reaction was stirred at room temperature for 16 hr, concentrated *in vacuo* and purified by reverse phase high performance liquid chromatography (C18, 0-100% MeCN in H<sub>2</sub>O, 0.1% TFA). The product was concentrated to yield the desired product as a white solid (2*S*,4*R*)-1-((2*S*)-2-(1-(4-(5-((furan-2-ylmethyl)amino)-[1,2,4]triazolo[4,3-*c*]pyrimidin-8-yl)benzoyl)pyrrolidine-3-carboxamido)-3,3-dimethylbutanoyl)-4-hydroxy-*N*-(4-(4-methylthiazol-5-yl)benzyl)pyrrolidine-2-carboxamide (3.28 mg, 21 %).

<sup>1</sup>H NMR (CD<sub>3</sub>OD-*d*<sub>4</sub>, 400 MHz):  $\delta$  9.33 (d, *J* = 11.77 Hz, 1H), 9.03 (d, *J* = 15.05 Hz, 1H), 8.11 (d, *J* = 14.32 Hz, 1H), 7.96 (d, *J* = 8.04 Hz, 2H), 7.70 – 7.63 (m, 2H), 7.52 – 7.35 (m, 5H), 6.47 – 6.36 (m, 2H), 4.63 – 4.46 (m, 3H), 4.40 – 4.27 (m, 2H), 3.95 – 3.89 (m, 2H), 3.87 – 3.76 (m, 2H), 3.74 – 3.53 (m, 3H), 3.24 – 3.15 (m, 1H), 2.47 (d, *J* = 15.49 Hz, 3H), 2.36 – 2.17 (m, 3H), 2.14 – 2.02 (m, 2H), 1.05 (app d, *J* = 10.20 Hz, 9H). LCMS: expected mass for [M+H]<sup>+</sup> (C<sub>44</sub>H<sub>49</sub>N<sub>10</sub>O<sub>6</sub>S) requires 845.35 m/z, found 845.25 m/z.

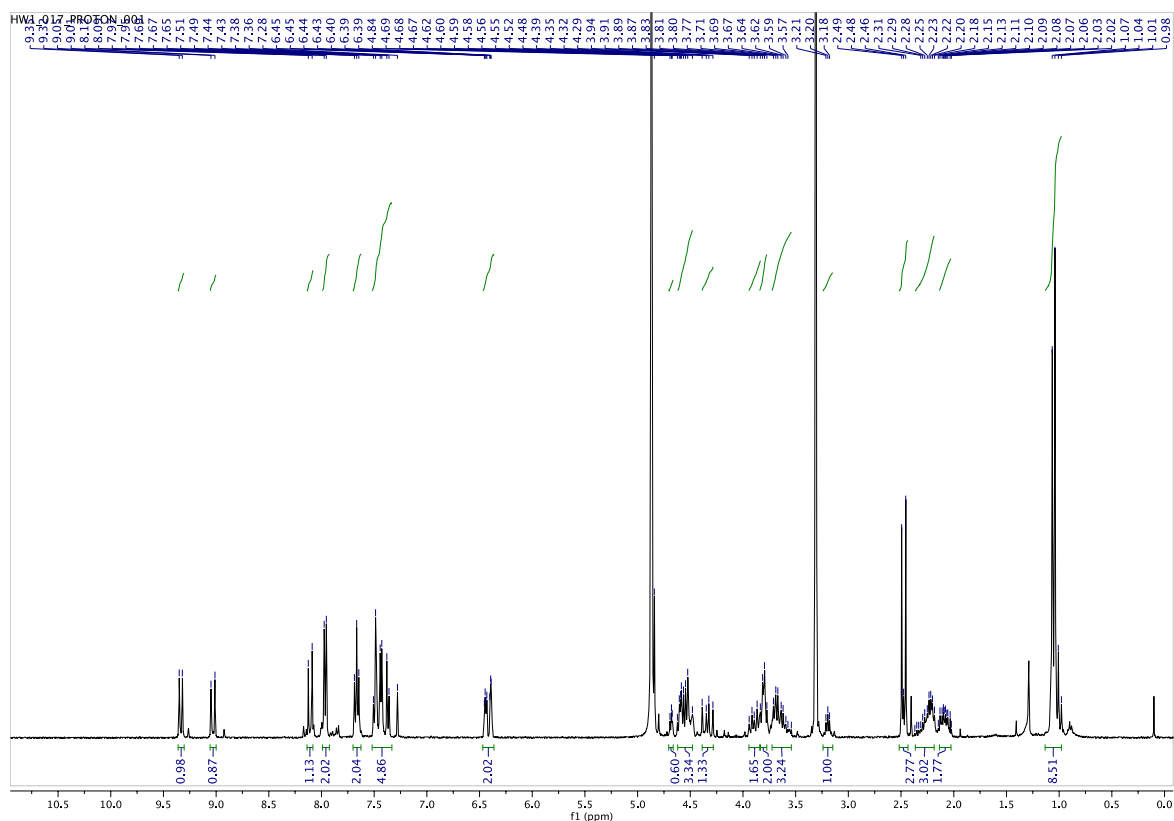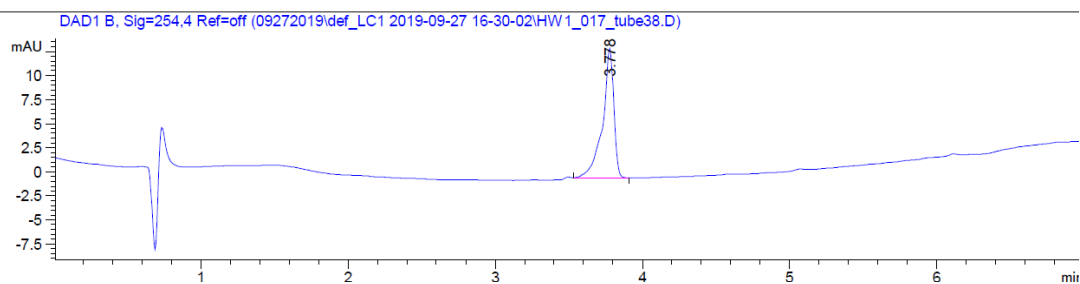

**1-(4-(5-((furan-2-ylmethyl)amino)-[1,2,4]triazolo[4,3-c]pyrimidin-8-yl)benzoyl)-*N*-((*S*)-1-((2*S*,4*R*)-4-hydroxy-2-((4-(4-methylthiazol-5-yl)benzyl)carbamoyl)pyrrolidin-1-yl)-3,3-dimethyl-1-oxobutan-2-yl)piperidine-4-carboxamide, UNC7326**

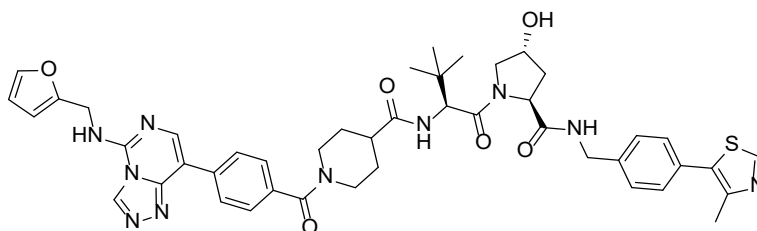

To a flask was added 4-(5-((furan-2-ylmethyl)amino)-[1,2,4]triazolo[4,3-c]pyrimidin-8-yl)benzoic acid (**9**) (5.0 mg, 15  $\mu$ mol, 1.0 equiv), DIPEA (7.8  $\mu$ L, 45  $\mu$ mol, 3.0 equiv), and TBTU (6.2 mg, 19  $\mu$ mol, 1.3 equiv) in DMF (1 mL), followed by addition of *N*-((*S*)-1-((2*S*,4*R*)-4-hydroxy-2-((4-(4-methylthiazol-5-yl)benzyl)carbamoyl)pyrrolidin-1-yl)-3,3-dimethyl-1-oxobutan-2-yl)piperidine-4-carboxamide 2,2,2-trifluoroacetate (9.0 mg, 15  $\mu$ mol, 1.0 equiv). The reaction was stirred at room temperature for 16 hr, concentrated *in vacuo* and purified by reverse phase high performance liquid chromatography (C18, 0-100% MeCN in H<sub>2</sub>O, 0.1% TFA). The product was concentrated to yield the desired product as a white solid 1-(4-(5-((furan-2-ylmethyl)amino)-[1,2,4]triazolo[4,3-c]pyrimidin-8-yl)benzoyl)-*N*-((*S*)-1-((2*S*,4*R*)-4-hydroxy-2-((4-(4-methylthiazol-5-yl)benzyl)carbamoyl)pyrrolidin-1-yl)-3,3-dimethyl-1-oxobutan-2-yl)piperidine-4-carboxamide (2.93 mg, 23 %).

<sup>1</sup>H NMR (CD<sub>3</sub>OD-*d*<sub>4</sub>, 400 MHz):  $\delta$  9.35 (s, 1H), 9.05 (s, 1H), 8.14 (s, 1H), 7.95 (d, *J* = 8.30 Hz, 2H), 7.56 (d, *J* = 8.30 Hz, 2H), 7.50 – 7.40 (m, 5H), 6.47 – 6.38 (m, 2H), 4.68 – 4.63 (m, 1H), 4.61 – 4.48 (m, 3H), 4.36 (d, *J* = 15.53 Hz, 1H), 3.89 (d, *J* = 10.90 Hz, 1H), 3.81 (dd, *J* = 3.78, 10.81 Hz, 1H), 3.24 – 3.15 (m, 1H), 3.02 – 2.91 (m, 1H), 2.77 – 2.66 (m, 1H), 2.49 (s, 3H), 2.26 – 2.19 (m, 1H), 2.13 – 2.04 (m, 1H), 1.97 – 1.85 (m, 2H), 1.80 – 1.66 (m, 4H), 1.05 (s, 9H). 2  $\times$  protons not observed. LCMS: expected mass for [M+H]<sup>+</sup> (C<sub>45</sub>H<sub>51</sub>N<sub>10</sub>O<sub>6</sub>S) requires 859.36 m/z, found 859.20 m/z.

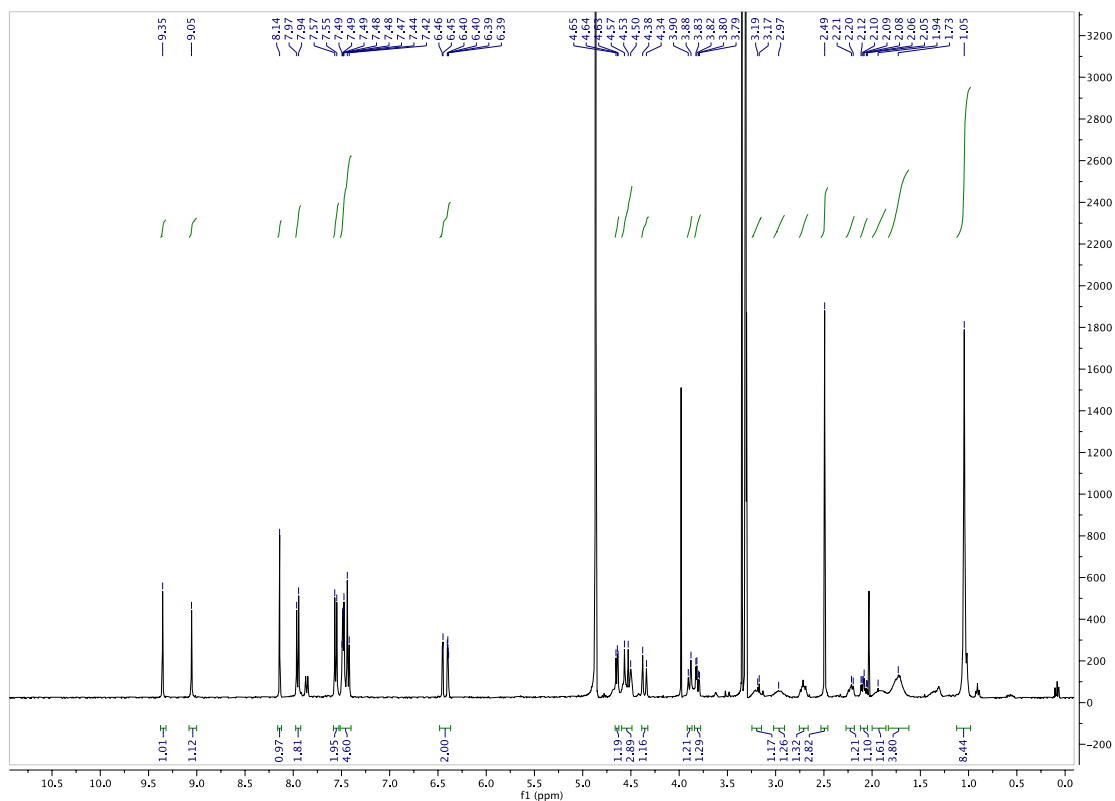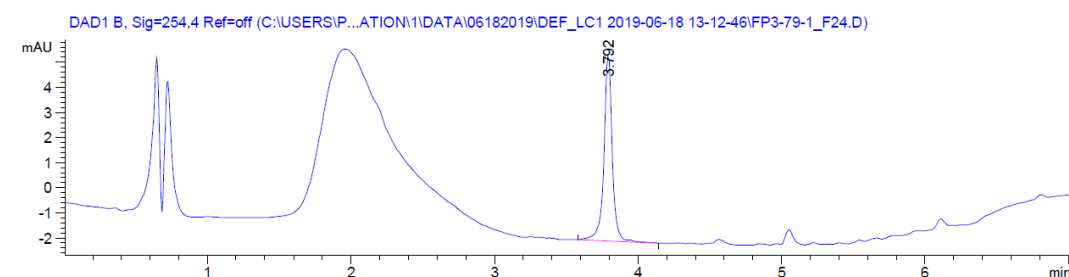

**1-(4-(5-((furan-2-ylmethyl)amino)-[1,2,4]triazolo[4,3-c]pyrimidin-8-yl)benzoyl)-N-((S)-1-((2S,4R)-4-hydroxy-2-((4-(4-methylthiazol-5-yl)benzyl)carbamoyl)pyrrolidin-1-yl)-3,3-dimethyl-1-oxobutan-2-yl)piperidine-3-carboxamide Diastereoisomer A + B, UNC7702**

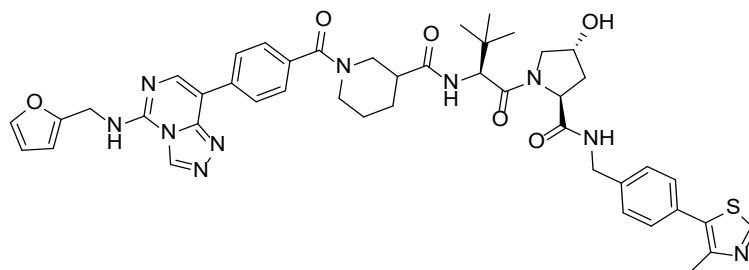

To a flask was added 4-(5-((furan-2-ylmethyl)amino)-[1,2,4]triazolo[4,3-c]pyrimidin-8-yl)benzoic acid (**9**) (7.26 mg, 21  $\mu$ mol, 1.0 equiv), DIPEA (11.3  $\mu$ L, 65  $\mu$ mol, 3.0 equiv), and TBTU (9.04 mg, 28  $\mu$ mol, 1.3 equiv) in DMF (0.55 mL), followed by addition of 3-(((S)-1-((2S,4R)-4-hydroxy-2-((4-(4-methylthiazol-5-yl)benzyl)carbamoyl)pyrrolidin-1-yl)-3,3-dimethyl-1-oxobutan-2-yl)carbamoyl)piperidin-1-ium 2,2,2-trifluoroacetate (14.2 mg, 22  $\mu$ mol, 1.0 equiv). The reaction was stirred at room temperature for 6 hr, concentrated *in vacuo* and purified by reverse phase high

performance liquid chromatography (C18, 0-100% MeCN in H<sub>2</sub>O, 0.1% TFA). The product was concentrated to yield the desired product containing separated diastereoisomers as a white solid 1-(4-(5-((furan-2-ylmethyl)amino)-[1,2,4]triazolo[4,3-c]pyrimidin-8-yl)benzoyl)-*N*-((*S*)-1-((*2S,4R*)-4-hydroxy-2-((4-(4-methylthiazol-5-yl)benzyl)carbamoyl)pyrrolidin-1-yl)-3,3-dimethyl-1-oxobutan-2-yl)piperidine-3-carboxamide (Diastereoisomer A: 1.93 mg, 10.4%; Diastereoisomer B: 1.56 mg, 8.4%). Diastereoisomeric mixture was tested at a 1:1 ratio in biological assays.

### Diastereoisomer A Analysis

<sup>1</sup>H NMR (CD<sub>3</sub>OD-*d*<sub>4</sub>, 400 MHz): δ 9.35 (s, 1H), 9.05 (s, 1H), 8.12 (s, 1H), 7.99 (d, *J* = 8.03 Hz, 2H), 7.57 (d, *J* = 6.70 Hz, 2H), 7.52 – 7.40 (m, 5H), 6.47 – 6.37 (m, 2H), 4.66 (s, 1H), 4.61 – 4.46 (m, 4H), 4.36 (d, *J* = 15.42 Hz, 1H), 3.94 – 3.71 (m, 3H), 3.27 – 3.16 (m, 1H), 3.03 – 2.93 (m, 1H), 2.75 – 2.61 (m, 1H), 2.49 (s, 3H), 2.26 – 2.19 (s, 1H), 2.14 – 2.05 (s, 1H), 2.02 – 1.95 (s, 1H), 1.88 – 1.71 (s, 2H), 1.66 – 1.48 (s, 1H), 0.99 (app m, 9H). (2 × 1H not observed – under H<sub>2</sub>O peak). Exchangeable 1H not observed. LCMS: expected mass for [M+H]<sup>+</sup> (C<sub>45</sub>H<sub>51</sub>N<sub>10</sub>O<sub>6</sub>S) requires 859.36 m/z, found 859.30 m/z. Retention time = 3.771 mins.

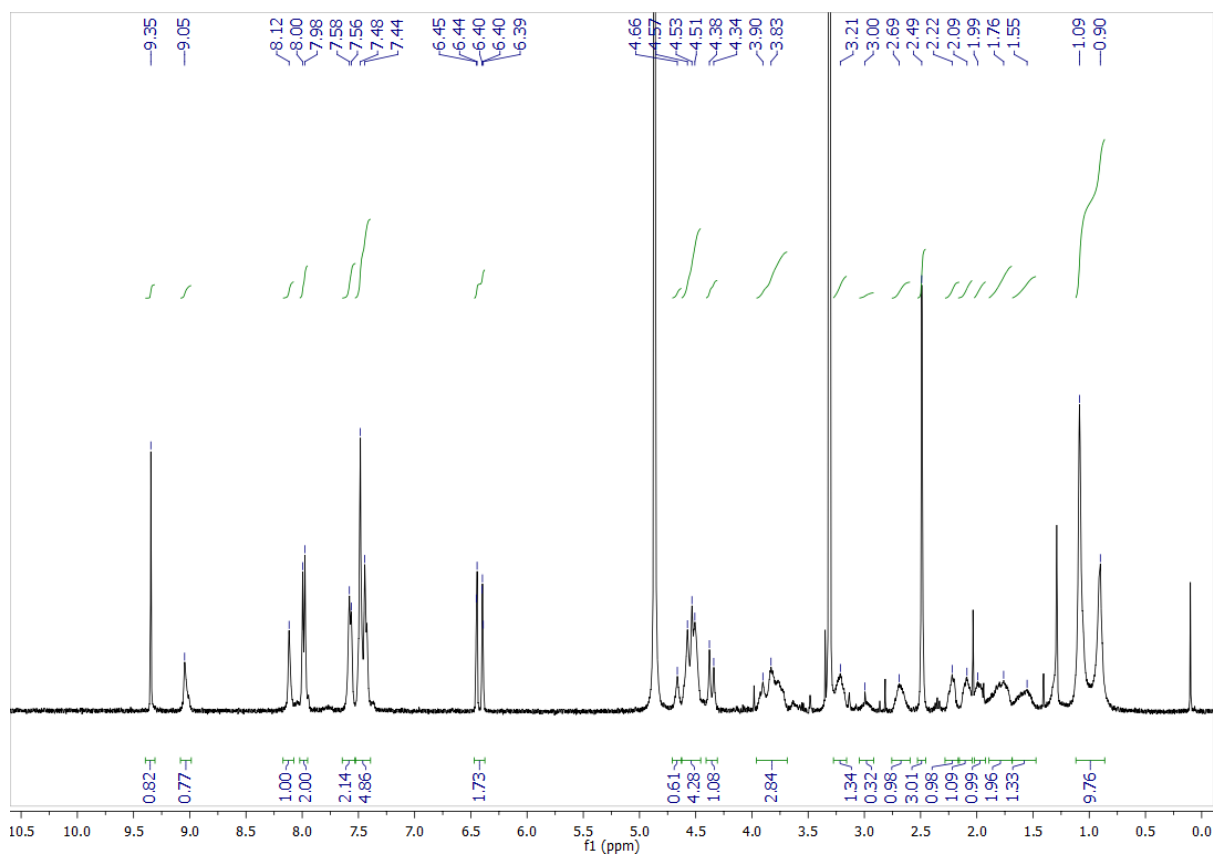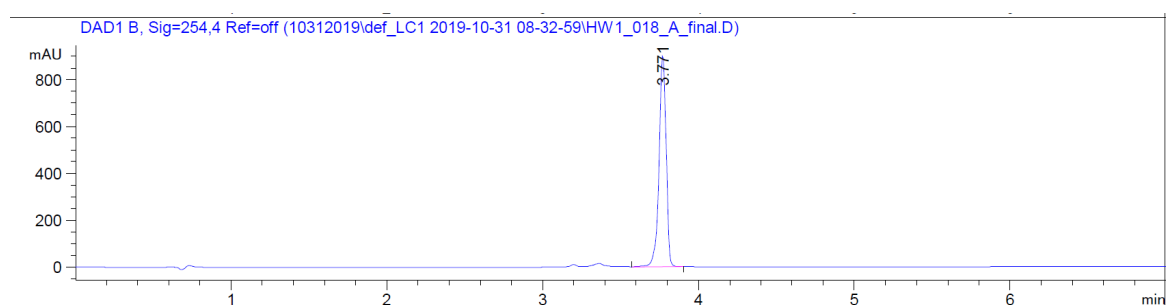

## Diastereoisomer B Analysis

$^1\text{H}$  NMR (Acetone- $d_6$ , 400 MHz):  $\delta$  9.29 (s, 1H), 8.85 (s, 1H), 8.19 (d,  $J = 5.74$  Hz, 2H), 8.06 (s, 1H), 7.86 (t,  $J = 5.21$  Hz, 1H), 7.55 – 7.49 (m, 3H), 7.49 – 7.45 (m, 2H), 7.41 – 7.37 (m, 2H), 6.48 – 6.37 (m, 2H), 4.87 (s, 2H), 4.69 – 4.55 (m, 3H), 4.53 – 4.46 (m, 1H), 4.33 (dd,  $J = 3.15, 15.28$  Hz, 1H), 3.93 – 3.55 (m, 4H), 2.74 – 2.64 (m, 1H), 2.45 (s, 3H), 2.19 – 2.13 (m, 2H), 1.85 – 1.72 (m, 2H), 1.62 – 1.49 (m, 2H), 1.00 (s, 9H). LCMS: expected mass for  $[\text{M}+\text{H}]^+$  ( $\text{C}_{45}\text{H}_{51}\text{N}_{10}\text{O}_6\text{S}$ ) requires 859.36 m/z, found 859.25 m/z. Retention time = 3.928 mins.

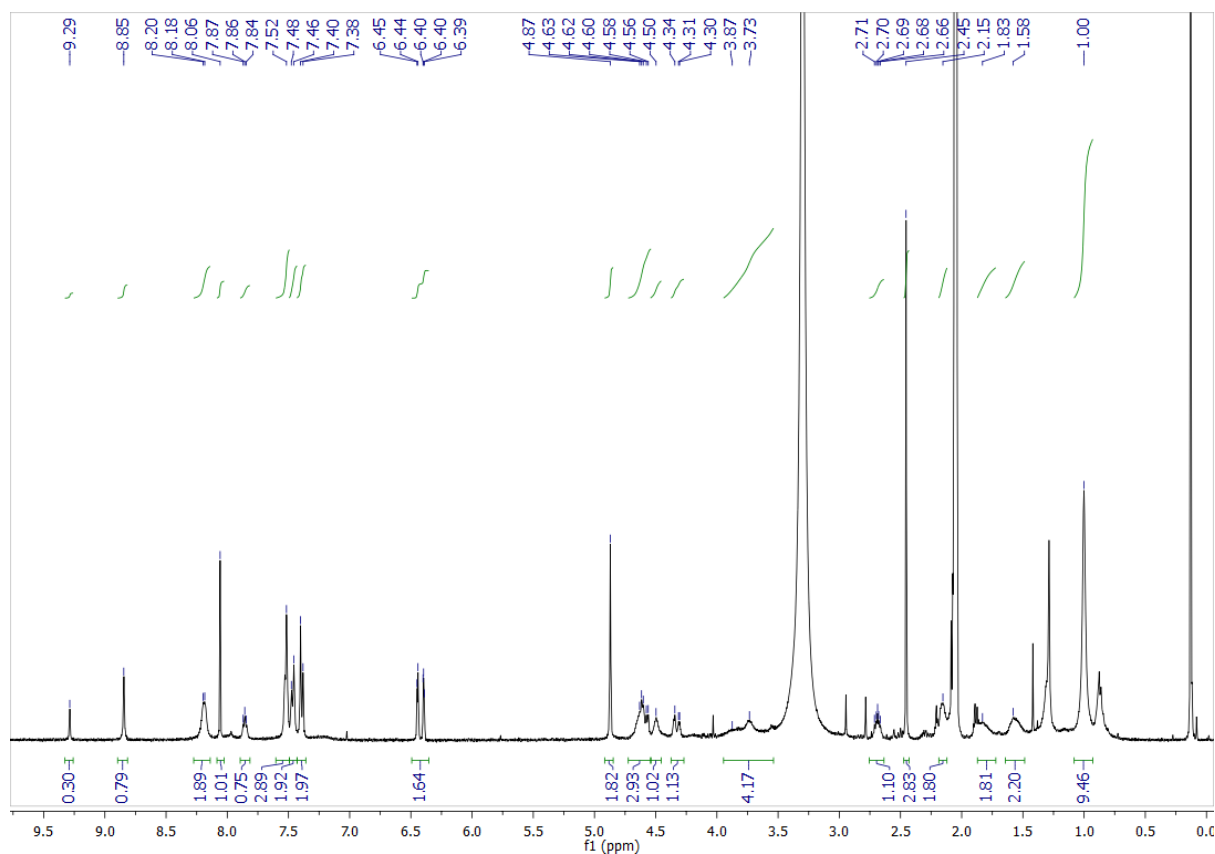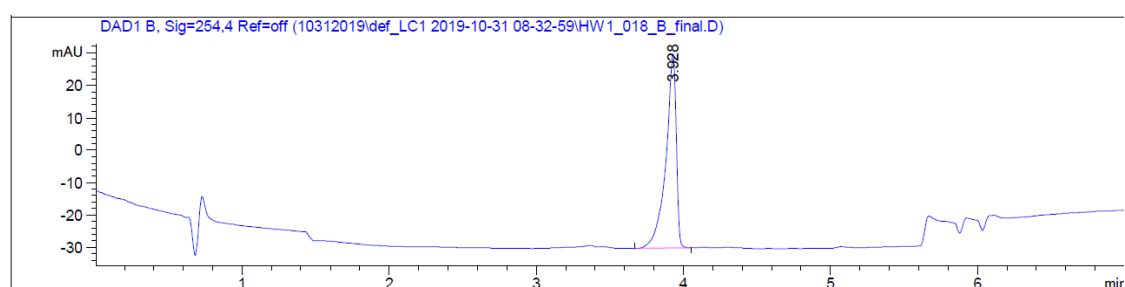

**4-fluoro-1-(4-(5-((furan-2-ylmethyl)amino)-[1,2,4]triazolo[4,3-c]pyrimidin-8-yl)benzoyl)-N-((S)-1-((2S,4R)-4-hydroxy-2-((4-(4-methylthiazol-5-yl)benzyl)carbamoyl)pyrrolidin-1-yl)-3,3-dimethyl-1-oxobutan-2-yl)piperidine-4-carboxamide, UNC7703**

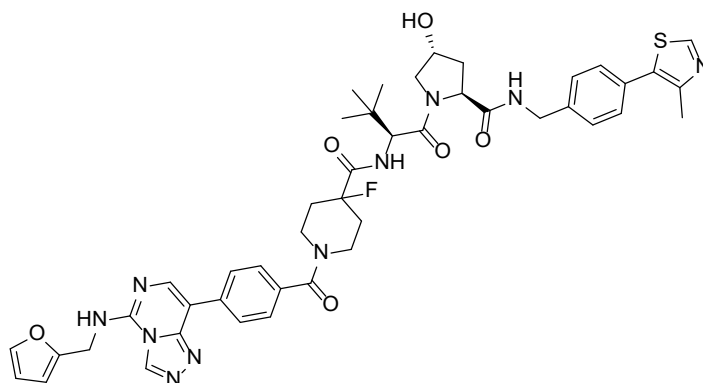

To a flask was added 4-(5-((furan-2-ylmethyl)amino)-[1,2,4]triazolo[4,3-c]pyrimidin-8-yl)benzoic acid (**9**) (5.0 mg, 15  $\mu$ mol, 1.0 equiv), DIPEA (7.8  $\mu$ L, 45  $\mu$ mol, 3.0 equiv), and TBTU (6.2 mg, 19  $\mu$ mol, 1.3 equiv) in DMF (1 mL), followed by addition of 4-fluoro-N-((S)-1-((2S,4R)-4-hydroxy-2-((4-(4-methylthiazol-5-yl)benzyl)carbamoyl)pyrrolidin-1-yl)-3,3-dimethyl-1-oxobutan-2-yl)piperidine-4-carboxamide 2,2,2-trifluoroacetate (10.0 mg, 15  $\mu$ mol, 1.0 equiv). The reaction was stirred at room temperature for 16 hr, concentrated *in vacuo* and purified by reverse phase high performance liquid chromatography (C18, 0-100% MeCN in H<sub>2</sub>O, 0.1% TFA). The product was concentrated to yield the desired product as a white solid 4-fluoro-1-(4-(5-((furan-2-ylmethyl)amino)-[1,2,4]triazolo[4,3-c]pyrimidin-8-yl)benzoyl)-N-((S)-1-((2S,4R)-4-hydroxy-2-((4-(4-methylthiazol-5-yl)benzyl)carbamoyl)pyrrolidin-1-yl)-3,3-dimethyl-1-oxobutan-2-yl)piperidine-4-carboxamide (2.76 mg, 21 %).

<sup>1</sup>H NMR (CD<sub>3</sub>OD-*d*<sub>4</sub>, 400 MHz):  $\delta$  9.35 (s, 1H), 9.05 (s, 1H), 8.12 (s, 1H), 7.99 (d, *J* = 8.38 Hz, 2H), 7.60 (d, *J* = 8.34 Hz, 2H), 7.49 – 7.43 (m, 5H), 6.47 – 6.38 (m, 2H), 4.70 (d, *J* = 9.40 Hz, 1H), 4.62 – 4.56 (m, 2H), 4.55 – 4.48 (m, 2H), 4.36 (d, *J* = 15.60 Hz, 1H), 3.87 – 3.79 (m, 2H), 3.55 – 3.41 (m, 2H), 3.27 – 3.17 (s, 1H), 2.50 (s, 3H), 2.31 – 1.81 (m, 8H), 1.04 (s, 9H). LCMS: expected mass for [M+H]<sup>+</sup> (C<sub>45</sub>H<sub>49</sub>FN<sub>10</sub>O<sub>6</sub>S) requires 877.35 m/z, found 877.30 m/z.



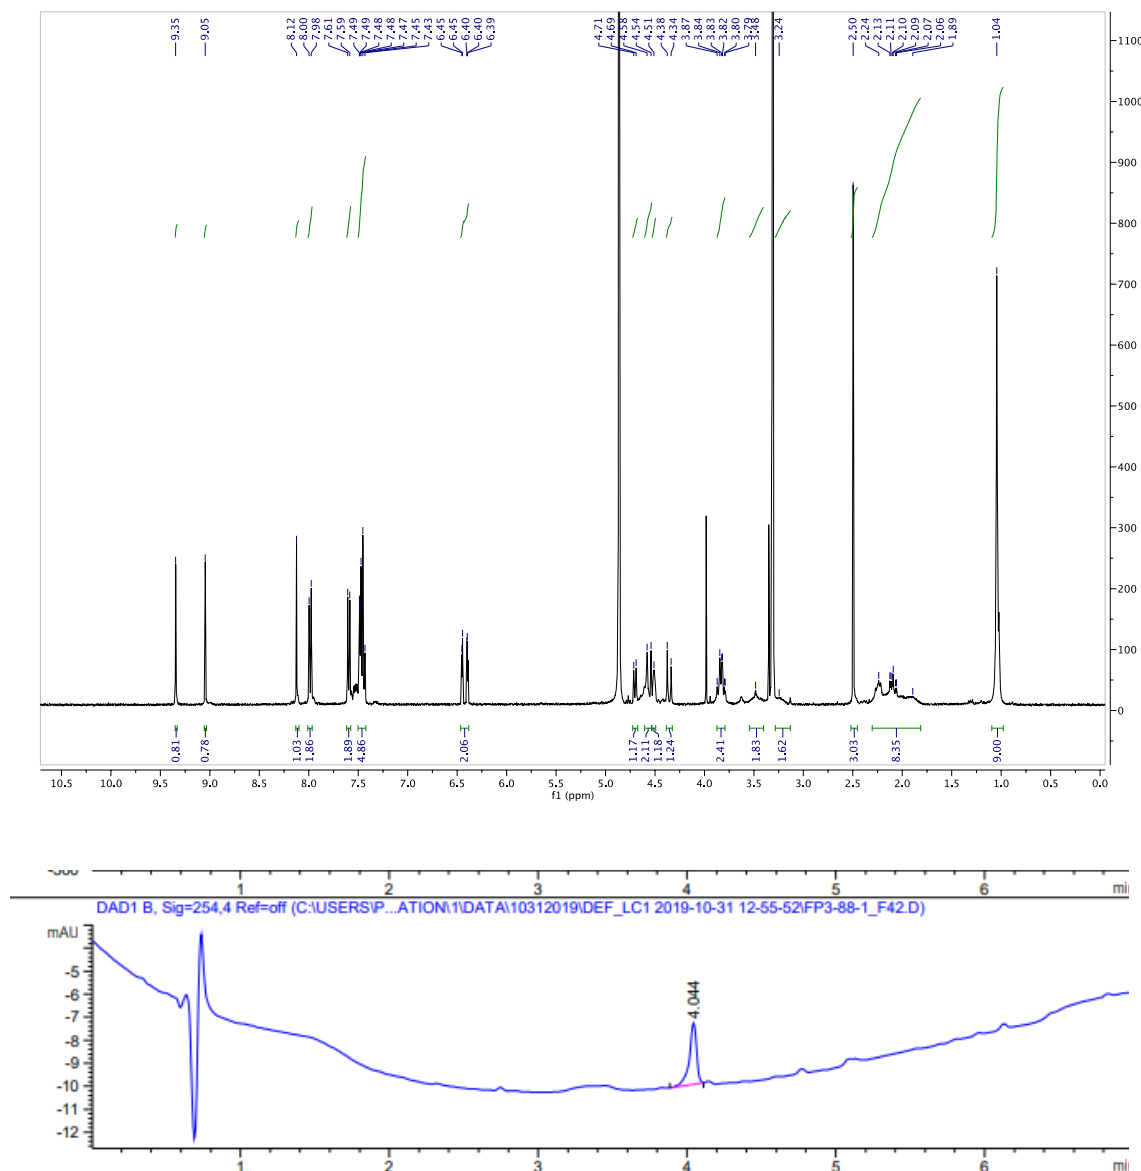

**4-(5-((furan-2-ylmethyl)amino)-[1,2,4]triazolo[4,3-c]pyrimidin-8-yl)benzaldehyde, 10**

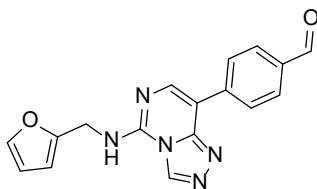

To a microwave vial was added 4-(4,4,5,5-tetramethyl-1,3,2-dioxaborolan-2-yl)benzaldehyde (100 mg, 431  $\mu$ mol, 1.5 equiv), 8-bromo-*N*-(furan-2-ylmethyl)-[1,2,4]triazolo[4,3-*c*]pyrimidin-5-amine (84.5 mg, 287  $\mu$ mol, 1.0 equiv), Pd(dppf)Cl<sub>2</sub>·CH<sub>2</sub>Cl<sub>2</sub> (47 mg, 58  $\mu$ mol, 0.2 equiv), sodium bicarbonate (60 mg, 718  $\mu$ mol, 2.5 equiv) in THF (1 mL) and H<sub>2</sub>O (0.5 mL). The vial was sealed and heated to 90 °C for 16 hr. The reaction was cooled and filtered through celite with EtOAc. The organics were washed with H<sub>2</sub>O (2 × 200 mL), the organics dried with sodium sulfate and concentrated *in vacuo* to yield the crude product. Crude material was purified by column chromatography (0-100% EtOAc in hexane) to yield the desired

product as a yellow solid 4-(5-((furan-2-ylmethyl)amino)-[1,2,4]triazolo[4,3-c]pyrimidin-8-yl)benzaldehyde (**10**) (66 mg, 72%).

$^1\text{H}$  NMR ( $\text{CD}_3\text{OD}-d_4$ , 400 MHz):  $\delta$  10.02 (s, 1H), 9.30 (s, 1H), 8.20 (d,  $J = 8.19$  Hz, 2H), 8.10 (s, 1H), 8.00 (d,  $J = 8.23$  Hz, 2H), 7.48 (s, 1H), 6.46 – 6.36 (m, 2H), 4.84 (s, 2H). LCMS: expected mass for  $[\text{M}+\text{H}]^+$  ( $\text{C}_{17}\text{H}_{14}\text{N}_5\text{O}_2$ ) requires 320.11 m/z, found 320.10 m/z.

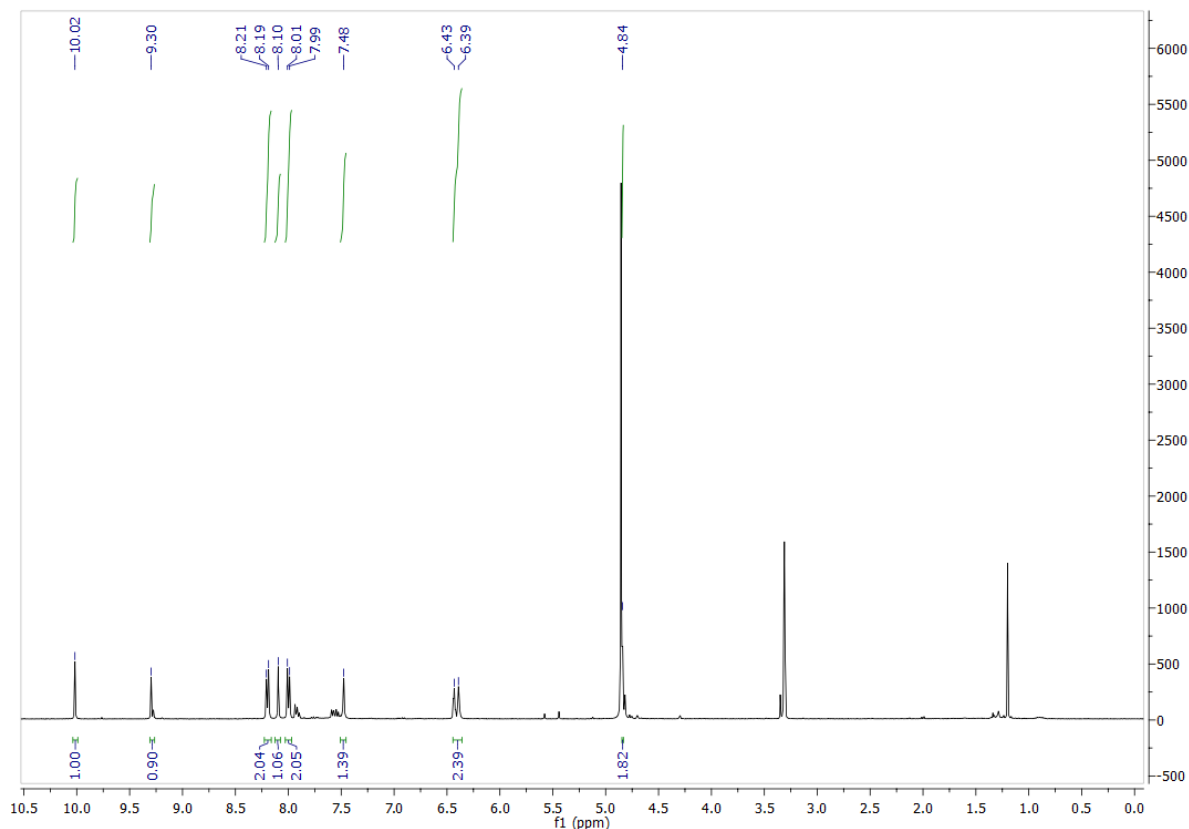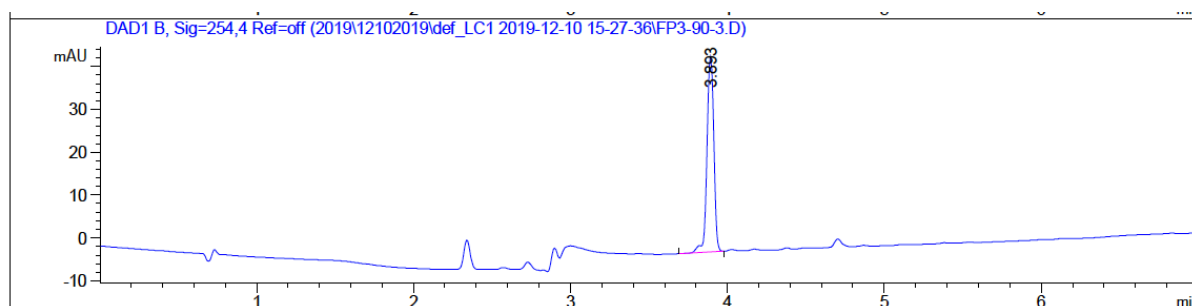

**Methyl 4-((tert-butoxycarbonyl)(4-(5-((furan-2-ylmethyl)amino)-[1,2,4]triazolo[4,3-c]pyrimidin-8-yl)benzyl)amino)butanoate, 11**

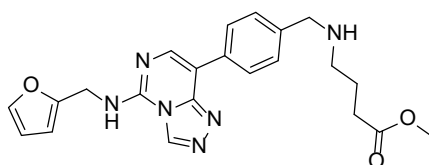

To a flask was added 4-aminobutanoate 2,2,2-trifluoroacetate (16 mg, 69  $\mu\text{mol}$ , 1.1 equiv), 4-(5-((furan-2-ylmethyl)amino)-[1,2,4]triazolo[4,3-c]pyrimidin-8-yl)benzaldehyde (**10**) (20 mg, 63  $\mu\text{mol}$ , 1.0 equiv), sodium sulfate (9.8 mg, 69  $\mu\text{mol}$ , 1.1 equiv), and DIPEA (23  $\mu\text{L}$ , 0.13 mmol, 2.1 equiv) in  $\text{CH}_2\text{Cl}_2$

(0.5 mL). The reaction was refluxed at 40 °C for 1hr, concentrated *in vacuo*, resuspended in MeOH (0.5 mL) followed by addition of sodium tetrahydroborate (2.8 mg, 75  $\mu$ mol, 1.2 equiv). The reaction was stirred at rt for 16 hr, concentrated *in vacuo* and purified by column chromatography (0-100% EtOAc in hexane) to yield the desired product as a brown gum methyl 4-((4-(5-((furan-2-ylmethyl)amino)-[1,2,4]triazolo[4,3-c]pyrimidin-8-yl)benzyl)amino)butanoate (**11**) (9.8 mg, 37 %).

$^1\text{H}$  NMR ( $\text{CD}_3\text{OD}-d_4$ , 400 MHz):  $\delta$  9.31 (s, 1H), 8.03 (d,  $J = 8.32$  Hz, 2H), 7.98 (s, 1H), 7.59 (d,  $J = 8.28$  Hz, 2H), 7.49 – 7.45 (m, 1H), 6.44 – 6.37 (m, 2H), 4.83 (s, 2H), 4.25 (s, 2H), 3.69 (s, 3H), 3.15 – 3.10 (m, 2H), 2.50 (t,  $J = 7.07$  Hz, 2H), 2.07 – 1.98 (m, 2H). LCMS: expected mass for  $[\text{M}+\text{H}]^+$  ( $\text{C}_{22}\text{H}_{25}\text{N}_6\text{O}_3$ ) requires 421.19 m/z, found 421.20 m/z.

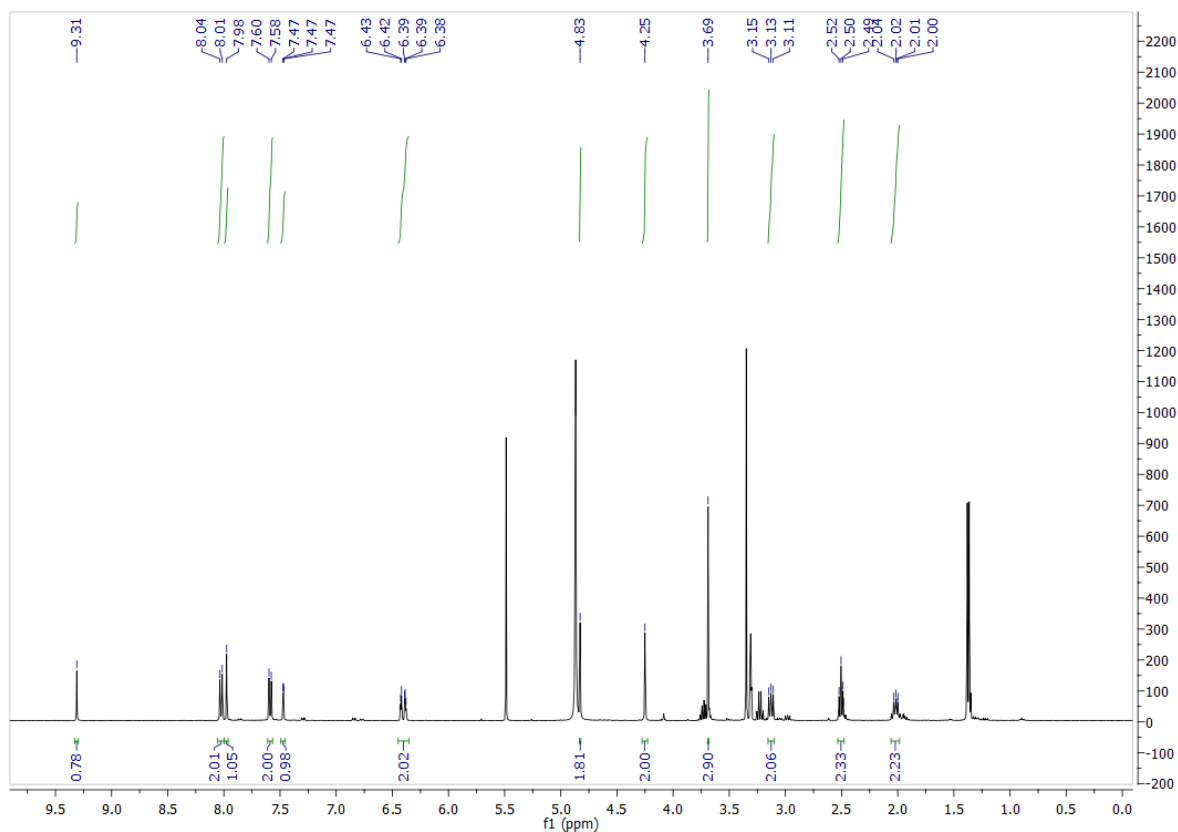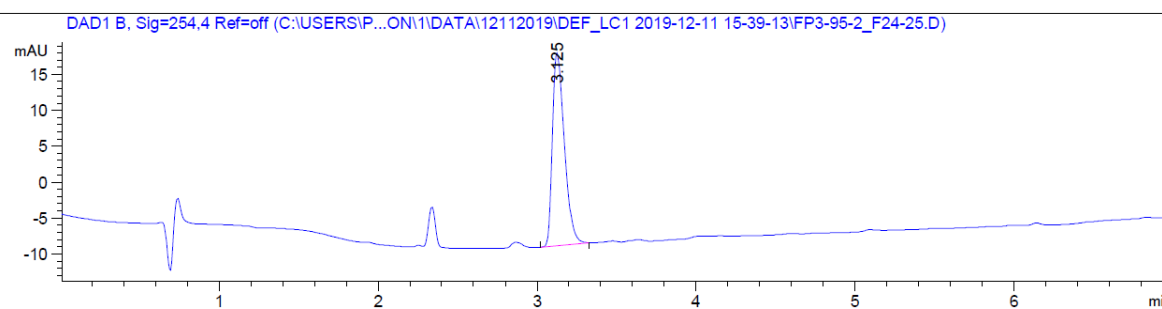

**Methyl 3-((4-(5-((furan-2-ylmethyl)amino)-[1,2,4]triazolo[4,3-c]pyrimidin-8-yl)benzyl)amino)cyclobutane-1-carboxylate, 12**

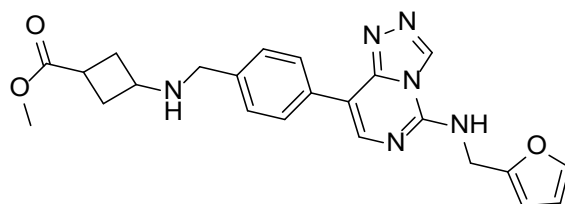

To a flask was added 3-aminocyclobutane-1-carboxylate 2,2,2-trifluoroacetate (8.4 mg, 34  $\mu\text{mol}$ , 1.1 equiv), 4-(5-((furan-2-ylmethyl)amino)-[1,2,4]triazolo[4,3-c]pyrimidin-8-yl)benzaldehyde (**10**) (10 mg, 31  $\mu\text{mol}$ , 1.0 equiv), sodium sulfate (4.9 mg, 34  $\mu\text{mol}$ , 1.1 equiv), and DIPEA (11  $\mu\text{L}$ , 66  $\mu\text{mol}$ , 2.1 equiv) in  $\text{CH}_2\text{Cl}_2$  (0.3 mL). The reaction was refluxed at 40  $^\circ\text{C}$  for 1hr, concentrated *in vacuo*, resuspended in MeOH (0.5 mL) followed by addition of sodium tetrahydroborate (1.4 mg, 38  $\mu\text{mol}$ , 1.2 equiv). The reaction was stirred at rt for 16 hr, concentrated *in vacuo* and purified by column chromatography (0-100% EtOAc in hexane) to yield the desired product as a brown gum methyl 3-((4-(5-((furan-2-ylmethyl)amino)-[1,2,4]triazolo[4,3-c]pyrimidin-8-yl)benzyl)amino)cyclobutane-1-carboxylate (**12**) (6.0 mg, 44 %).

$^1\text{H}$  NMR ( $\text{DMSO-}d_6$ , 400 MHz):  $\delta$  9.47 (s, 1H), 8.87 (t,  $J = 5.28$  Hz, 1H), 8.05 (dd,  $J = 2.09, 8.28$  Hz, 2H), 8.03 – 8.02 (m, 1H), 7.63 (s, 1H), 7.42 (d,  $J = 8.19$  Hz, 2H), 6.46 – 6.41 (m, 2H), 4.77 (d,  $J = 5.23$  Hz, 2H), 3.71 (s, 2H), 3.59 (d,  $J = 6.87$  Hz, 3H), 3.21 – 3.14 (m, 1H), 3.07 – 3.00 (m, 1H), 2.39 – 2.27 (m, 2H), 2.13 – 2.03 (m, 1H), 1.99 – 1.88 (m, 1H).  $^{13}\text{C}$  NMR ( $\text{DMSO-}d_6$ , 101 MHz):  $\delta$  175.76, 174.56, 151.22, 148.62, 143.33, 142.52, 139.80, 132.90, 131.97, 128.35, 126.94, 111.16, 110.61, 107.85, 51.51, 51.37, 50.55, 49.48, 49.41, 48.52, 37.69, 33.32, 32.18, 32.03, 30.42. extra carbons peaks due to a diastereomeric mixture. LCMS: expected mass for  $[\text{M}+\text{H}]^+$  ( $\text{C}_{23}\text{H}_{25}\text{N}_6\text{O}_3$ ) requires 433.19 m/z, found 433.20 m/z.

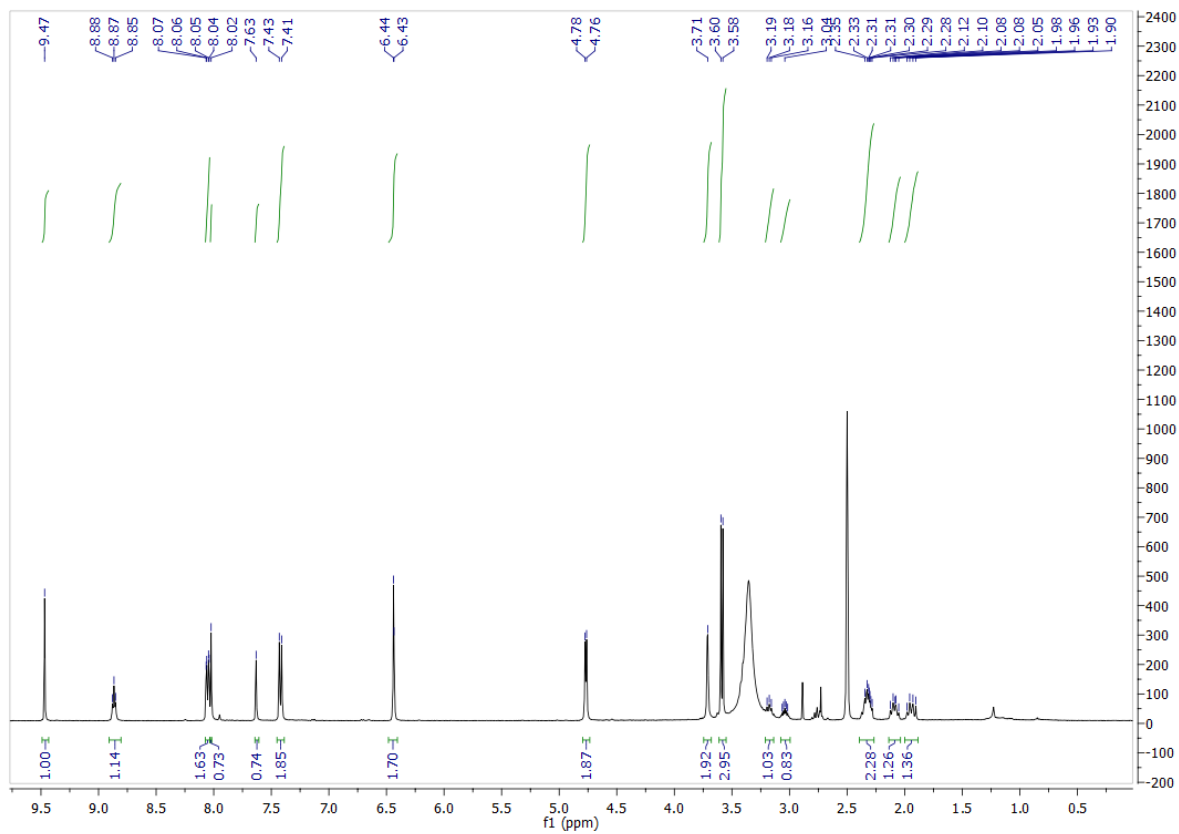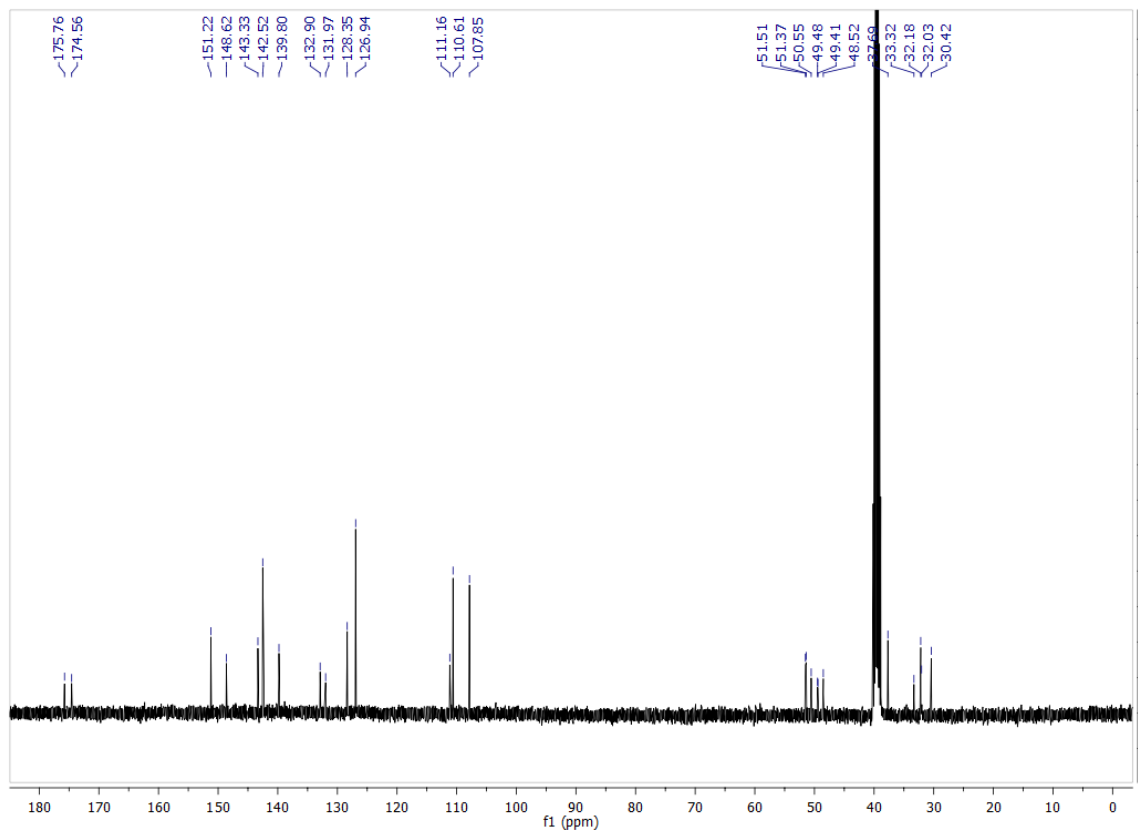

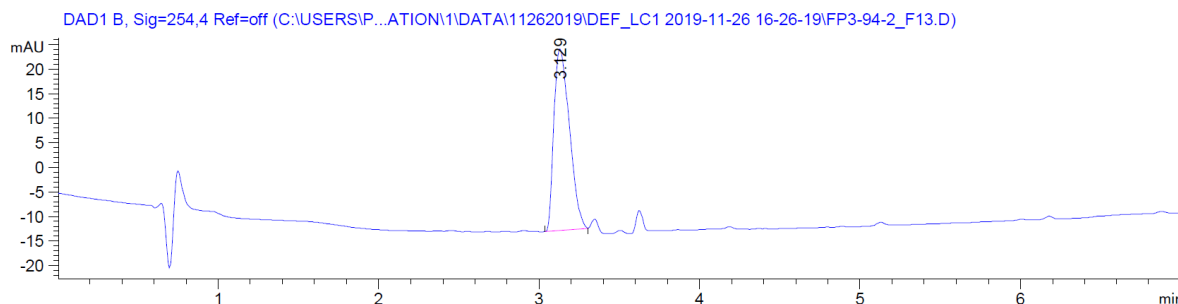

**Methyl 1-(4-(5-((furan-2-ylmethyl)amino)-[1,2,4]triazolo[4,3-c]pyrimidin-8-yl)benzyl)piperidine-4-carboxylate, **13****

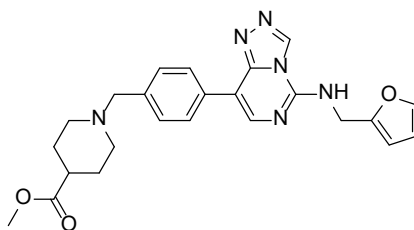

To a flask was added methyl piperidine-4-carboxylate 2,2,2-trifluoroacetate (8.9 mg, 34  $\mu$ mol, 1.1 equiv), 4-(5-((furan-2-ylmethyl)amino)-[1,2,4]triazolo[4,3-c]pyrimidin-8-yl)benzaldehyde (**10**) (10 mg, 31  $\mu$ mol, 1.0 equiv), sodium sulfate (4.9 mg, 34  $\mu$ mol, 1.1 equiv), and DIPEA (11  $\mu$ L, 66  $\mu$ mol, 2.1 equiv) in  $\text{CH}_2\text{Cl}_2$  (0.3 mL). The reaction was refluxed at 40  $^\circ\text{C}$  for 1hr, concentrated *in vacuo*, resuspended in MeOH (0.5 mL) followed by addition of sodium tetrahydroborate (1.4 mg, 38  $\mu$ mol, 1.2 equiv). The reaction was stirred at rt for 16 hr, concentrated *in vacuo* and purified by column chromatography (0-100% EtOAc in hexane) to yield the desired product as a brown solid methyl 1-(4-(5-((furan-2-ylmethyl)amino)-[1,2,4]triazolo[4,3-c]pyrimidin-8-yl)benzyl)piperidine-4-carboxylate (**13**) (4.7 mg, 34 %).

$^1\text{H}$  NMR ( $\text{CD}_3\text{OD}-d_4$ , 400 MHz):  $\delta$  9.28 (s, 1H), 7.93 (s, 1H), 7.90 (d,  $J = 8.16$  Hz, 2H), 7.49 – 7.44 (m, 3H), 6.44 – 6.37 (m, 2H), 4.82 (s, 2H), 3.67 (s, 3H), 3.63 (s, 2H), 2.95 (ap d,  $J = 11.53$  Hz, 2H), 2.44 – 2.35 (m, 1H), 2.20 (t,  $J = 11.25$  Hz, 2H), 1.98 – 1.88 (m, 2H), 1.82 – 1.70 (m, 2H).  $^{13}\text{C}$  NMR ( $\text{CD}_3\text{OD}-d_4$ , 101 MHz):  $\delta$  176.90, 143.65, 142.33, 140.52, 137.54, 134.68, 133.26, 131.18, 128.87, 113.69, 111.51, 109.09, 63.65, 53.66, 52.19, 41.76, 39.28, 28.89. 1  $\times$  aliphatic carbon not observed. LCMS: expected mass for  $[\text{M}+\text{H}]^+$  ( $\text{C}_{24}\text{H}_{27}\text{N}_6\text{O}_3$ ) requires 447.21 m/z, found 447.20 m/z.

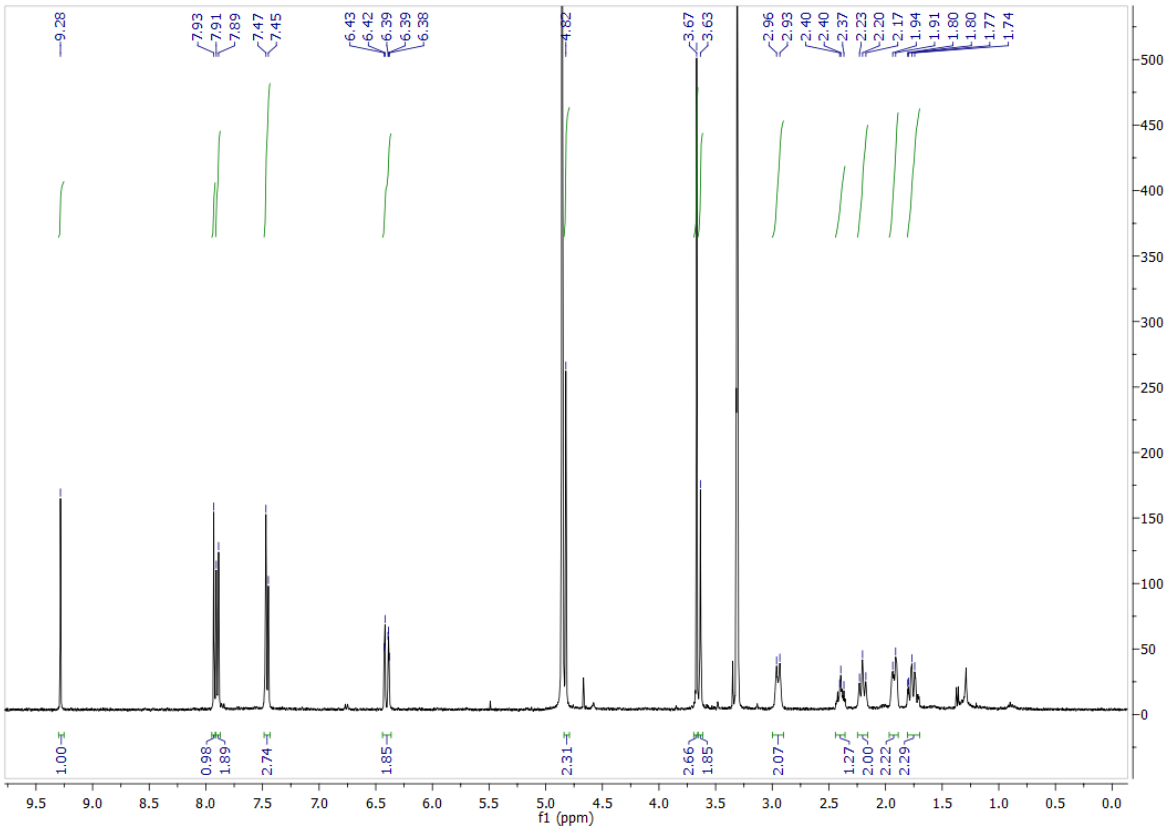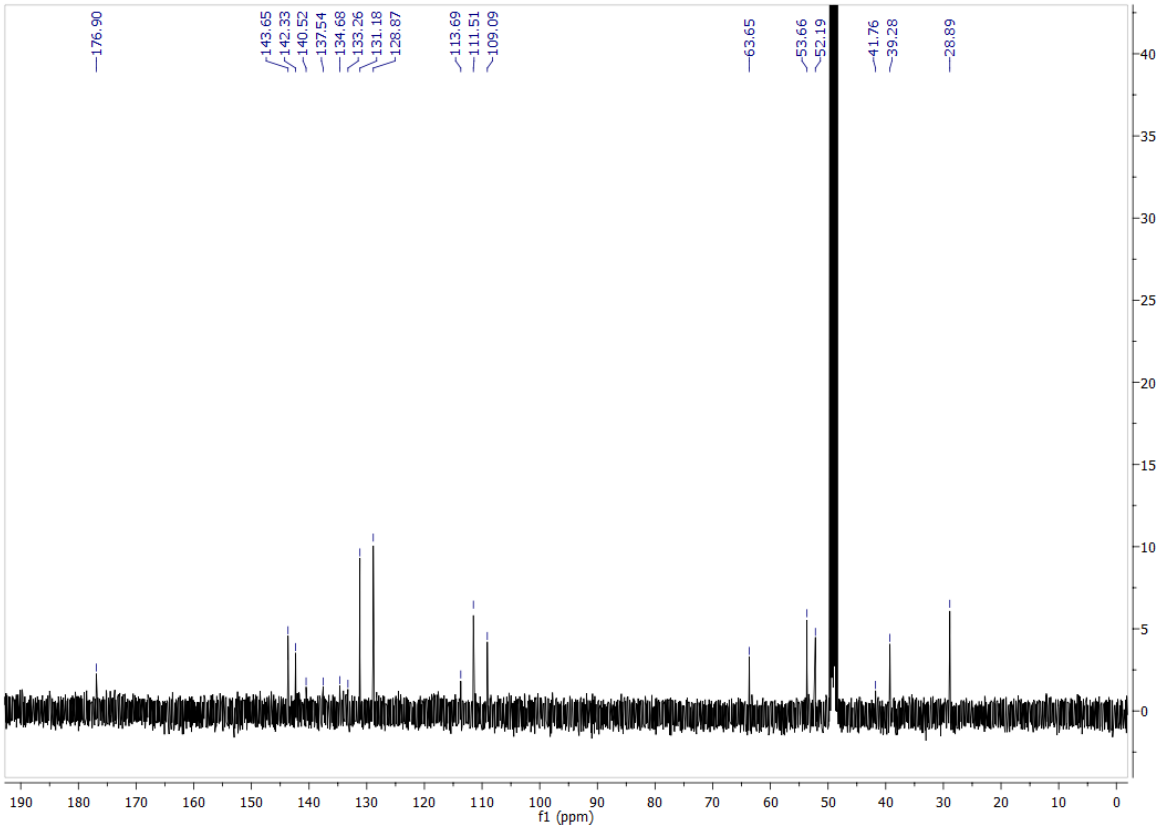

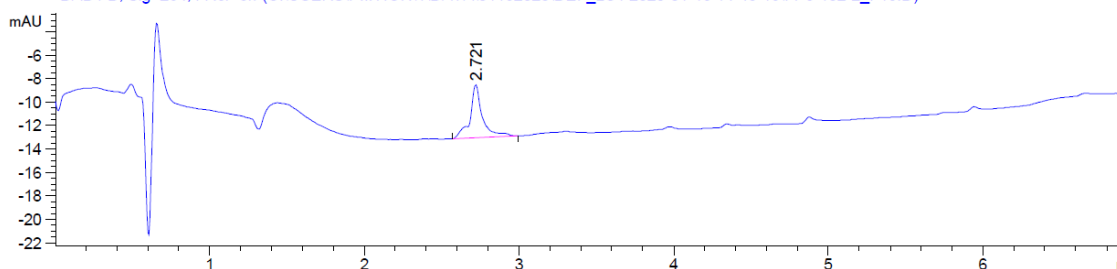

**Methyl 4-((*tert*-butoxycarbonyl)(4-(5-((furan-2-ylmethyl)amino)-[1,2,4]triazolo[4,3-*c*]pyrimidin-8-yl)benzyl)amino)butanoate, **14****

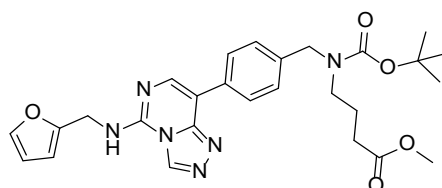

To a flask containing methyl 4-((4-(5-((furan-2-ylmethyl)amino)-[1,2,4]triazolo[4,3-*c*]pyrimidin-8-yl)benzyl)amino)butanoate (**11**) (9.8 mg, 23  $\mu$ mol, 1.0 equiv) in  $\text{CH}_2\text{Cl}_2$  (93  $\mu$ L) was added Boc anhydride (5.6 mg, 23  $\mu$ mol, 1.1 equiv),  $\text{NEt}_3$  (8.1  $\mu$ L, 58  $\mu$ mol, 2.5 equiv), and the reaction stirred at room temperature for 16 hr. The reaction was concentrated *in vacuo* and purified by column chromatography (0-10% MeOH in  $\text{CH}_2\text{Cl}_2$ ) to yield the desired product as a yellow solid methyl 4-((*tert*-butoxycarbonyl)(4-(5-((furan-2-ylmethyl)amino)-[1,2,4]triazolo[4,3-*c*]pyrimidin-8-yl)benzyl)amino)butanoate (**14**) (6.2 mg, 51%).

LCMS: expected mass for  $[\text{M}+\text{H}]^+$  ( $\text{C}_{27}\text{H}_{33}\text{N}_6\text{O}_5$ ) requires 521.24  $m/z$ , found 521.30  $m/z$ .

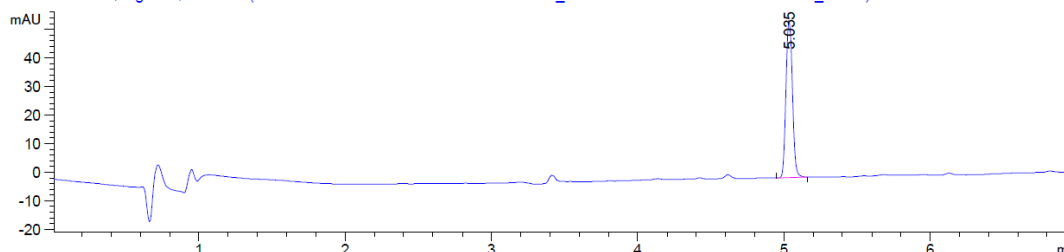

**Methyl 3-((*tert*-butoxycarbonyl)(4-(5-((furan-2-ylmethyl)amino)-[1,2,4]triazolo[4,3-*c*]pyrimidin-8-yl)benzyl)amino)cyclobutane-1-carboxylate, **15****

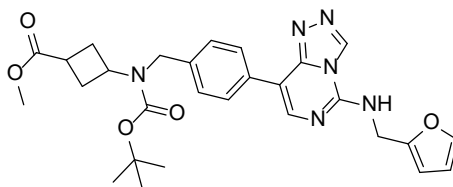

To a flask containing methyl 3-((4-(5-((furan-2-ylmethyl)amino)-[1,2,4]triazolo[4,3-*c*]pyrimidin-8-yl)benzyl)amino)cyclobutane-1-carboxylate (**12**) (6.0 mg, 14  $\mu$ mol, 1.0 equiv) in  $\text{CH}_2\text{Cl}_2$  (55  $\mu$ L) was added Boc anhydride (3.3 mg, 15  $\mu$ mol, 1.1 equiv),  $\text{NEt}_3$  (4.8  $\mu$ L, 35  $\mu$ mol, 2.5 equiv), and the reaction stirred at room temperature for 16 hr. The reaction was concentrated *in vacuo* and purified by column chromatography (0-10% MeOH in  $\text{CH}_2\text{Cl}_2$ ) to yield the desired product as a yellow solid methyl 3-((*tert*-



butoxycarbonyl)(4-(5-((furan-2-ylmethyl)amino)-[1,2,4]triazolo[4,3-c]pyrimidin-8-yl)benzyl)amino)cyclobutane-1-carboxylate (**15**) (2.8 mg, 38%).

LCMS: expected mass for  $[M+H]^+$  ( $C_{28}H_{33}N_6O_5$ ) requires 533.24 m/z, found 533.20 m/z.

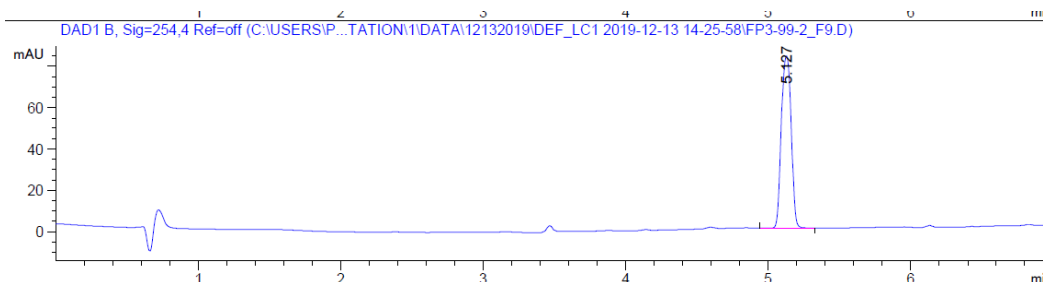

4-((*tert*-butoxycarbonyl)(4-(5-((furan-2-ylmethyl)amino)-[1,2,4]triazolo[4,3-c]pyrimidin-8-yl)benzyl)amino)butanoic acid, **16**

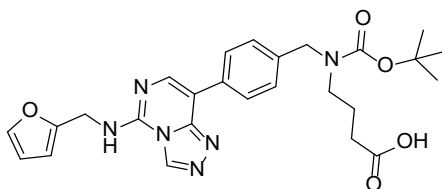

To a flask was added methyl 4-((*tert*-butoxycarbonyl)(4-(5-((furan-2-ylmethyl)amino)-[1,2,4]triazolo[4,3-c]pyrimidin-8-yl)benzyl)amino)butanoate (**14**) (6.2 mg, 12  $\mu$ mol, 1.0 equiv) and LiOH.H<sub>2</sub>O (1.5 mg, 36  $\mu$ mol, 3.0 equiv) in H<sub>2</sub>O (10  $\mu$ L) and THF (0.12 mL), and the reaction was left to stir at room temperature for 16 hr. The reaction was concentrated *in vacuo* and purified by reverse phase column chromatography (10-100% MeCN in H<sub>2</sub>O (+0.1% TFA)) to yield the desired product as a white gum 4-((*tert*-butoxycarbonyl)(4-(5-((furan-2-ylmethyl)amino)-[1,2,4]triazolo[4,3-c]pyrimidin-8-yl)benzyl)amino)butanoic acid (**16**) (3.6 mg, 60%). LCMS: expected mass for  $[M+H]^+$  ( $C_{26}H_{31}N_6O_5$ ) requires 507.23 m/z, found 507.20 m/z

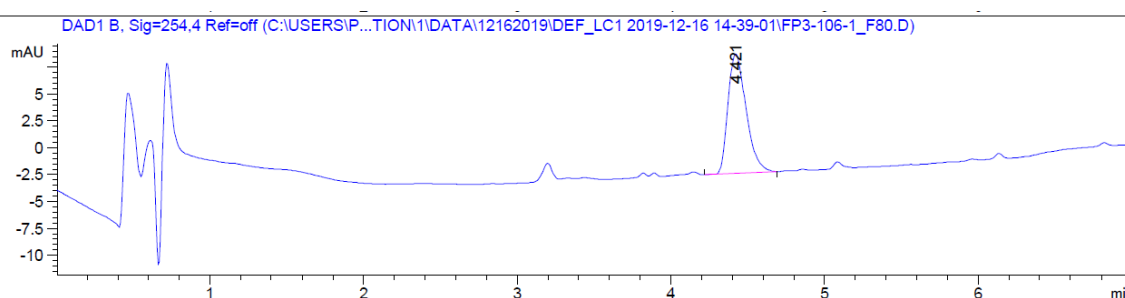

3-((*tert*-butoxycarbonyl)(4-(5-((furan-2-ylmethyl)amino)-[1,2,4]triazolo[4,3-c]pyrimidin-8-yl)benzyl)amino)cyclobutane-1-carboxylic acid, **17**

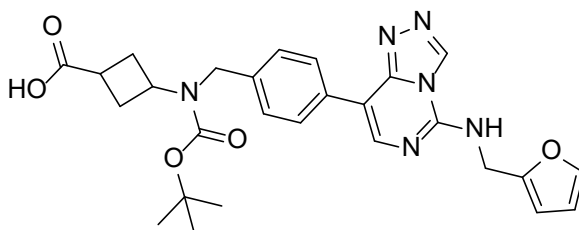

To a flask was added methyl 3-((*tert*-butoxycarbonyl)(4-(5-((furan-2-ylmethyl)amino)-[1,2,4]triazolo[4,3-*c*]pyrimidin-8-yl)benzyl)amino)cyclobutane-1-carboxylate (**15**) (2.9 mg, 5.4  $\mu$ mol, 1.0 equiv) and LiOH.H<sub>2</sub>O (0.7 mg, 16  $\mu$ mol, 3.0 equiv) in H<sub>2</sub>O (5  $\mu$ L) and THF (54  $\mu$ L), and the reaction was left to stir at room temperature for 16 hr. The reaction was concentrated *in vacuo* and purified by reverse phase column chromatography (10-100% MeCN in H<sub>2</sub>O (+0.1% TFA)) to yield the desired product as a white solid 3-((*tert*-butoxycarbonyl)(4-(5-((furan-2-ylmethyl)amino)-[1,2,4]triazolo[4,3-*c*]pyrimidin-8-yl)benzyl)amino)cyclobutane-1-carboxylic acid (**17**) (2.70 mg, 96%).

LCMS: expected mass for [M+H]<sup>+</sup> (C<sub>27</sub>H<sub>31</sub>N<sub>6</sub>O<sub>5</sub>) requires 519.23 m/z, found 519.20 m/z.

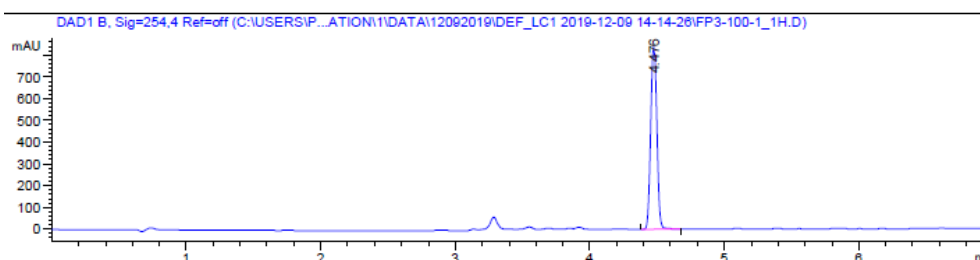

### 1-(4-(5-((furan-2-ylmethyl)amino)-[1,2,4]triazolo[4,3-*c*]pyrimidin-8-yl)benzyl)piperidine-4-carboxylic acid, **18**

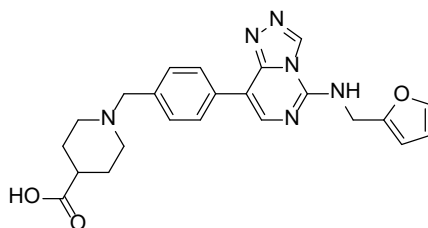

To a flask was added methyl 1-(4-(5-((furan-2-ylmethyl)amino)-[1,2,4]triazolo[4,3-*c*]pyrimidin-8-yl)benzyl)piperidine-4-carboxylate (**13**) (2.2 mg, 4.9  $\mu$ mol, 1.0 equiv) and LiOH.H<sub>2</sub>O (0.6 mg, 15  $\mu$ mol, 3.0 equiv) in H<sub>2</sub>O (4  $\mu$ L) and THF (50  $\mu$ L), and the reaction was left to stir at room temperature for 16 hr. The reaction was concentrated *in vacuo* and purified by reverse phase column chromatography (10-100% MeCN in H<sub>2</sub>O (+0.1% TFA)) to yield the desired product as a white solid 1-(4-(5-((furan-2-ylmethyl)amino)-[1,2,4]triazolo[4,3-*c*]pyrimidin-8-yl)benzyl)piperidine-4-carboxylic acid (**18**) (2.1 mg, 99%). LCMS: expected mass for [M+H]<sup>+</sup> (C<sub>23</sub>H<sub>25</sub>N<sub>6</sub>O<sub>3</sub>) requires 433.19 m/z, found 433.20 m/z.

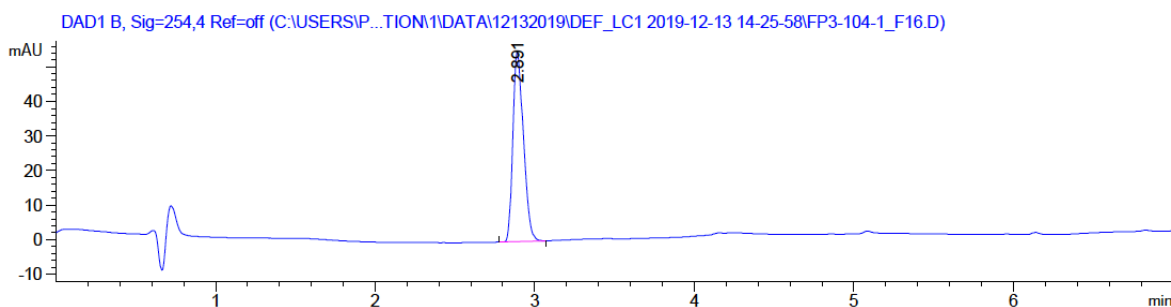

**(2*S*,4*R*)-1-((*S*)-2-(4-((4-(5-((furan-2-ylmethyl)amino)-[1,2,4]triazolo[4,3-*c*]pyrimidin-8-yl)benzyl)amino)butanamido)-3,3-dimethylbutanoyl)-4-hydroxy-*N*-(4-(4-methylthiazol-5-yl)benzyl)pyrrolidine-2-carboxamide 2,2,2-trifluoroacetate, UNC7744**

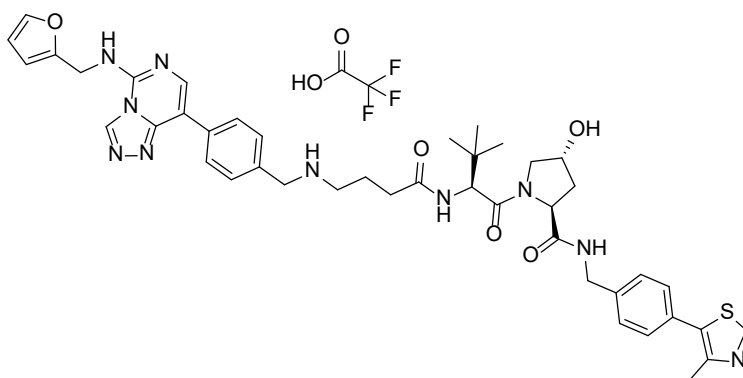

To a flask was added 4-((*tert*-butoxycarbonyl)(4-(5-((furan-2-ylmethyl)amino)-[1,2,4]triazolo[4,3-*c*]pyrimidin-8-yl)benzyl)amino)butanoic acid (**16**) (2.1 mg, 4.1  $\mu$ mol, 1.0 equiv), DIPEA (2.2  $\mu$ L, 12  $\mu$ mol, 3.0 equiv), and TBTU (1.7 mg, 5.4  $\mu$ mol, 1.3 equiv) in DMF (1 mL), followed by addition of (2*S*,4*R*)-1-((*S*)-2-((1*R*,3*S*)-3-aminocyclobutane-1-carboxamido)-3,3-dimethylbutanoyl)-4-hydroxy-*N*-(4-(4-methylthiazol-5-yl)benzyl)pyrrolidine-2-carboxamide 2,2,2-trifluoroacetate (2.5 mg, 4.6  $\mu$ mol, 1.1 equiv). The reaction was stirred at room temperature for 16 hr, concentrated *in vacuo* and deprotected with 20% TFA in  $\text{CH}_2\text{Cl}_2$  (1 mL). The reaction was concentrated *in vacuo* and purified by reverse phase high performance liquid chromatography (C18, 10-100% MeCN in  $\text{H}_2\text{O}$ , 0.1% TFA). The product was concentrated to yield the desired product as a white solid (2*S*,4*R*)-1-((*S*)-2-(4-((4-(5-((furan-2-ylmethyl)amino)-[1,2,4]triazolo[4,3-*c*]pyrimidin-8-yl)benzyl)amino)butanamido)-3,3-dimethylbutanoyl)-4-hydroxy-*N*-(4-(4-methylthiazol-5-yl)benzyl)pyrrolidine-2-carboxamide 2,2,2-trifluoroacetate (2.61 mg, 67 %).

$^1\text{H}$  NMR ( $\text{CD}_3\text{OD}-d_4$ , 400 MHz):  $\delta$  9.32 (s, 1H), 8.98 (s, 1H), 8.02 – 7.99 (m, 3H), 7.60 (d,  $J$  = 8.21 Hz, 2H), 7.49 – 7.44 (m, 3H), 7.40 (d,  $J$  = 8.28 Hz, 2H), 6.41 (dd,  $J$  = 2.31, 13.92 Hz, 2H), 4.84 (s, 2H), 4.62 – 4.56 (m, 2H), 4.55 – 4.51 (m, 2H), 4.35 (d,  $J$  = 15.51 Hz, 1H), 4.28 – 4.23 (m, 2H), 3.95 (d,  $J$  = 11.25 Hz, 1H), 3.82 (dd,  $J$  = 4.03, 10.94 Hz, 1H), 3.14 – 3.08 (m, 2H), 2.53 – 2.48 (m, 2H), 2.47 (s, 3H), 2.28 – 2.20 (m, 1H), 2.15 – 2.06 (m, 1H), 2.02 – 1.95 (m, 2H), 1.05 (m, 9H). LCMS: expected mass for  $[\text{M}+\text{H}]^+$  ( $\text{C}_{43}\text{H}_{51}\text{N}_{10}\text{O}_5\text{S}$ ) requires 819.37  $m/z$ , found 819.30  $m/z$ .

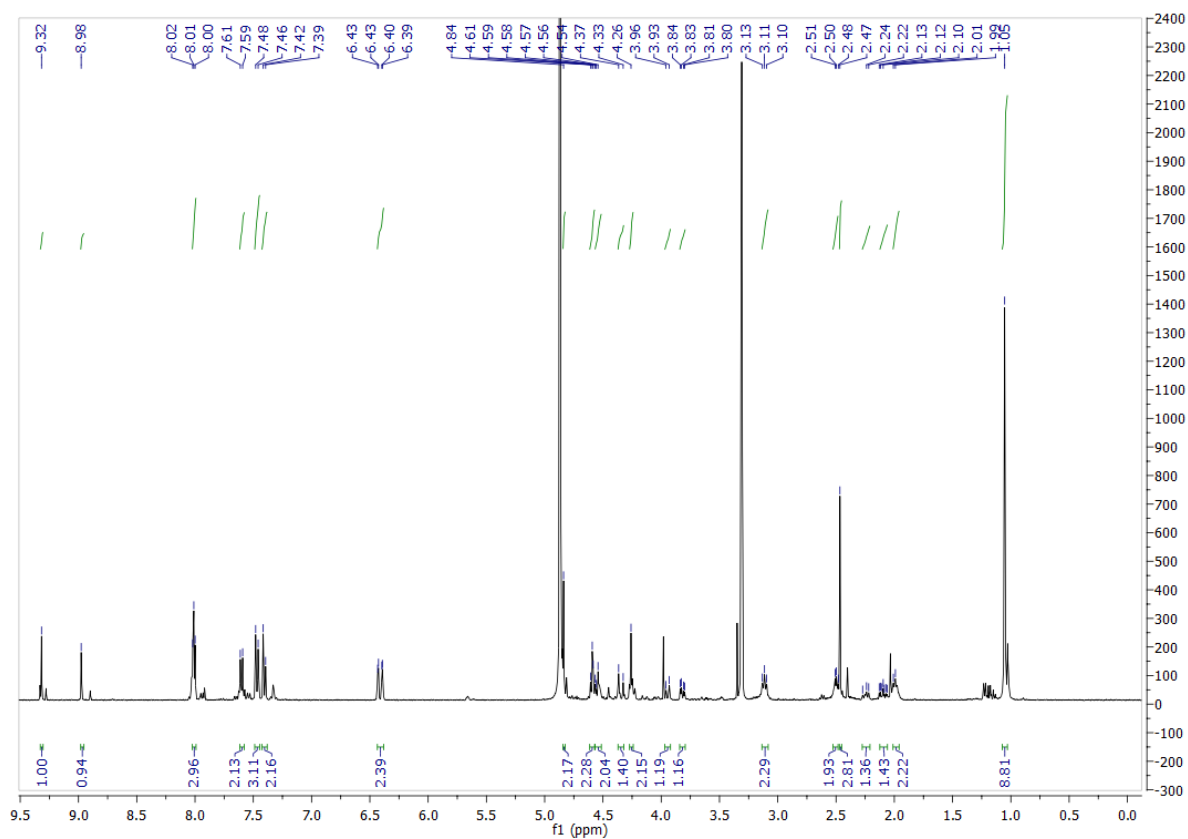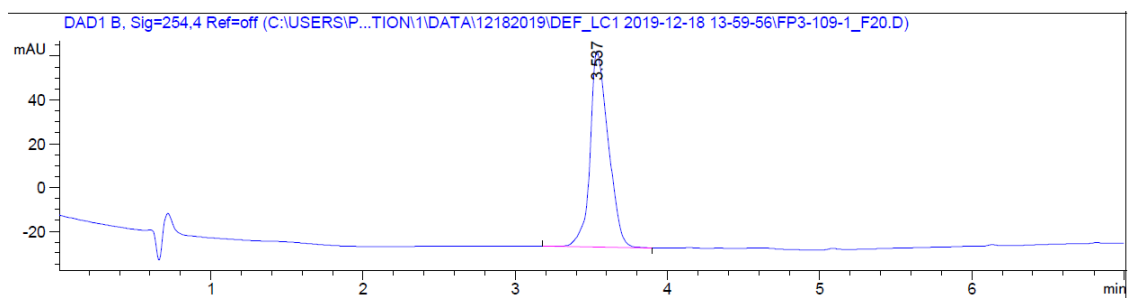

**(2*S*,4*R*)-1-((*S*)-2-(3-((4-(5-((furan-2-ylmethyl)amino)-[1,2,4]triazolo[4,3-*c*]pyrimidin-8-yl)benzyl)amino)cyclobutane-1-carboxamido)-3,3-dimethylbutanoyl)-4-hydroxy-*N*-(4-(4-methylthiazol-5-yl)benzyl)pyrrolidine-2-carboxamide 2,2,2-trifluoroacetate, UNC7742**

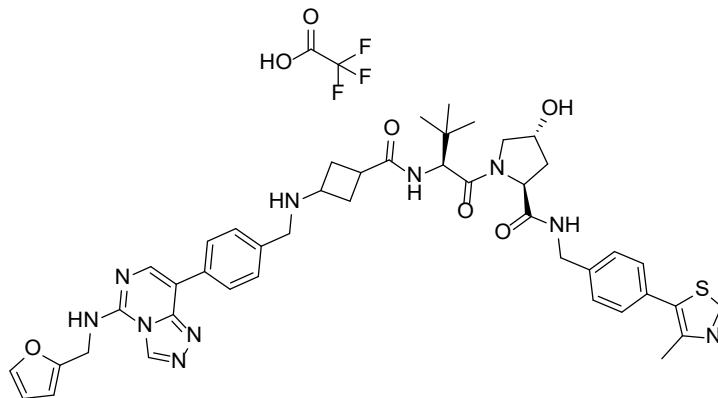

To a flask was added 3-((*tert*-butoxycarbonyl)(4-(5-((furan-2-ylmethyl)amino)-[1,2,4]triazolo[4,3-*c*]pyrimidin-8-yl)benzyl)amino)cyclobutane-1-carboxylic acid (**17**) (2.7 mg, 5.2  $\mu$ mol, 1.0 equiv), DIPEA (2.7  $\mu$ L, 16  $\mu$ mol, 3.0 equiv), and TBTU (2.2 mg, 6.8  $\mu$ mol, 1.3 equiv) in DMF (1 mL), followed by addition of (2*S*,4*R*)-1-((*S*)-2-((1*R*,3*S*)-3-aminocyclobutane-1-carboxamido)-3,3-dimethylbutanoyl)-4-hydroxy-*N*-(4-(4-methylthiazol-5-yl)benzyl)pyrrolidine-2-carboxamide 2,2,2-trifluoroacetate (3.1 mg, 5.7  $\mu$ mol, 1.1 equiv). The reaction was stirred at room temperature for 16 hr, concentrated *in vacuo* and deprotected with 20% TFA in  $\text{CH}_2\text{Cl}_2$  (1 mL). The reaction was concentrated *in vacuo* and purified by reverse phase high performance liquid chromatography (C18, 10-100% MeCN in  $\text{H}_2\text{O}$ , 0.1% TFA). The product was concentrated to yield the desired product as a white solid (2*S*,4*R*)-1-((*S*)-2-((4-(5-((furan-2-ylmethyl)amino)-[1,2,4]triazolo[4,3-*c*]pyrimidin-8-yl)benzyl)amino)cyclobutane-1-carboxamido)-3,3-dimethylbutanoyl)-4-hydroxy-*N*-(4-(4-methylthiazol-5-yl)benzyl)pyrrolidine-2-carboxamide 2,2,2-trifluoroacetate (2.2 mg, 46 %) over two steps.

$^1\text{H}$  NMR ( $\text{CD}_3\text{OD}-d_4$ , 400 MHz):  $\delta$  9.32 (s, 1H), 8.99 (s, 1H), 8.05 – 8.00 (m, 3H), 7.59 (dd,  $J = 2.97, 8.17$  Hz, 2H), 7.50 – 7.45 (m, 3H), 7.42 (d,  $J = 8.38$  Hz, 2H), 6.41 (dd,  $J = 2.48, 14.30$  Hz, 2H), 4.84 (s, 2H), 4.65 4.62 (m, 1H), 4.60 – 4.55 (m, 1H), 4.55 – 4.51 (m, 2H), 4.36 (dd,  $J = 2.72, 15.50$  Hz, 1H), 4.19 (d,  $J = 2.98$  Hz, 2H), 3.92 (d,  $J = 11.23$  Hz, 1H), 3.84 – 3.78 (m, 2H), 3.18 – 3.12 (m, 1H), 2.58 – 2.53 (m, 2H), 2.48 (s, 3H), 2.43 (d,  $J = 3.97$  Hz, 1H), 2.42 – 2.34 (m, 2H), 2.27 – 2.20 (m, 1H), 2.13 – 2.06 (m, 1H), 1.04 (s, 9H). LCMS: expected mass for  $[\text{M}+\text{H}]^+$  ( $\text{C}_{44}\text{H}_{51}\text{N}_{10}\text{O}_5\text{S}$ ) requires 831.37 m/z, found 831.30 m/z.

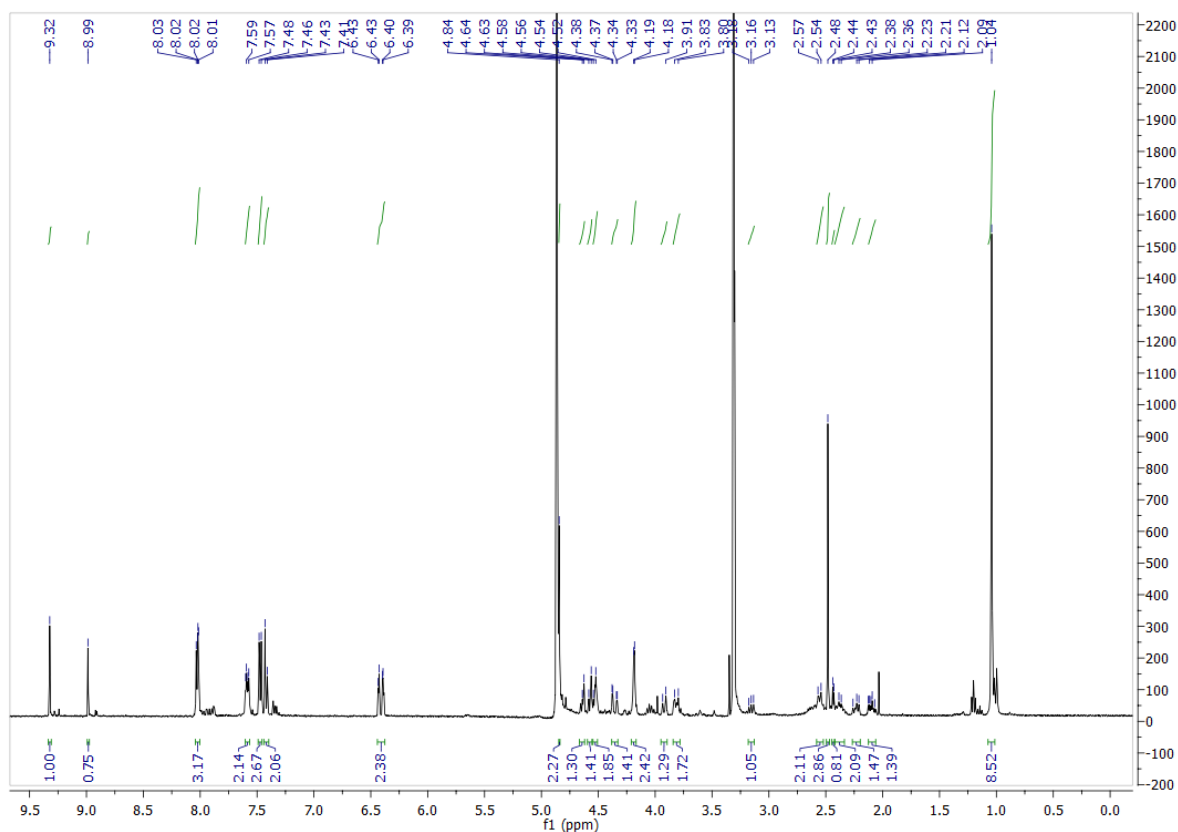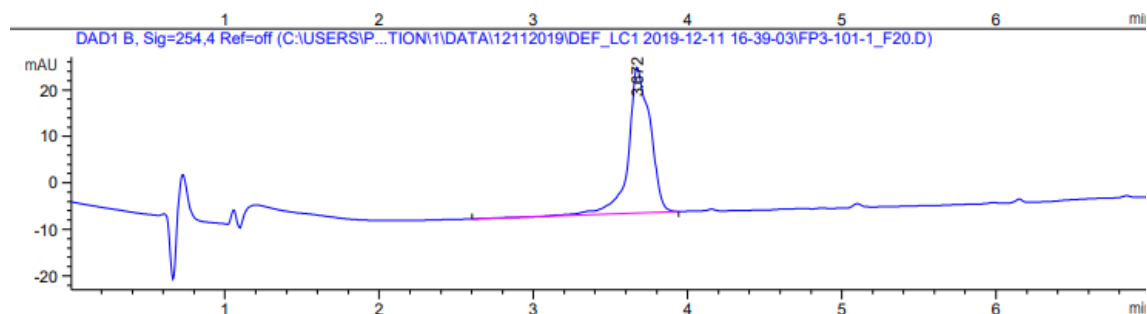

**1-(4-(5-((furan-2-ylmethyl)amino)-[1,2,4]triazolo[4,3-c]pyrimidin-8-yl)benzyl)-N-((S)-1-((2S,4R)-4-hydroxy-2-((4-(4-methylthiazol-5-yl)benzyl)carbamoyl)pyrrolidin-1-yl)-3,3-dimethyl-1-oxobutan-2-yl)piperidine-4-carboxamide 2,2,2-trifluoroacetate, UNC7743**

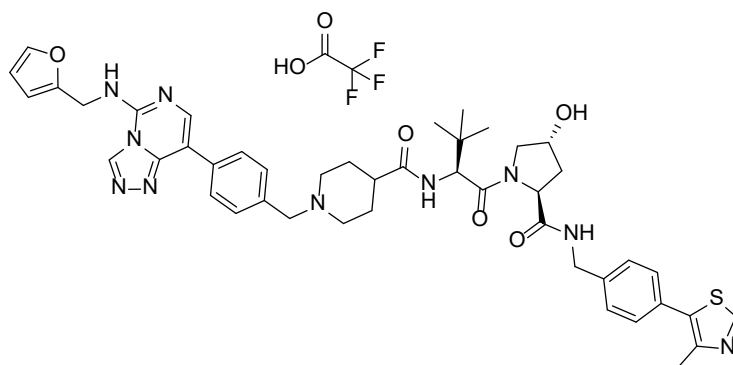

To a flask was added 1-(4-(5-((furan-2-ylmethyl)amino)-[1,2,4]triazolo[4,3-c]pyrimidin-8-yl)benzyl)piperidine-4-carboxylic acid (**18**) (2.1 mg, 4.9  $\mu$ mol, 1.0 equiv), DIPEA (2.5  $\mu$ L, 15  $\mu$ mol, 3.0 equiv), and TBTU (2.0 mg, 6.3  $\mu$ mol, 1.3 equiv) in DMF (1 mL), followed by addition of (2S,4R)-1-((S)-2-((1R,3S)-3-aminocyclobutane-1-carboxamido)-3,3-dimethylbutanoyl)-4-hydroxy-N-(4-(4-methylthiazol-5-yl)benzyl)pyrrolidine-2-carboxamide 2,2,2-trifluoroacetate (2.9 mg, 5.3  $\mu$ mol, 1.1 equiv). The reaction was stirred at room temperature for 16 hr, concentrated *in vacuo* and deprotected with 20% TFA in CH<sub>2</sub>Cl<sub>2</sub> (1 mL). The reaction was concentrated *in vacuo* and purified by reverse phase high performance liquid chromatography (C18, 10-100% MeCN in H<sub>2</sub>O, 0.1% TFA). The product was concentrated to yield the desired product as a white solid 1-(4-(5-((furan-2-ylmethyl)amino)-[1,2,4]triazolo[4,3-c]pyrimidin-8-yl)benzyl)-N-((S)-1-((2S,4R)-4-hydroxy-2-((4-(4-methylthiazol-5-yl)benzyl)carbamoyl)pyrrolidin-1-yl)-3,3-dimethyl-1-oxobutan-2-yl)piperidine-4-carboxamide 2,2,2-trifluoroacetate (1.39 mg, 30 %) over two steps.

<sup>1</sup>H NMR (CD<sub>3</sub>OD-*d*<sub>4</sub>, 400 MHz):  $\delta$  9.32 (s, 1H), 8.94 (s, 1H), 8.06 (d, *J* = 8.24 Hz, 2H), 8.02 (s, 1H), 7.95 (d, *J* = 8.80 Hz, 1H), 7.616 (d, *J* = 8.34 Hz, 2H), 7.50 – 7.45 (m, 2H), 7.43 – 7.39 (m, 2H), 6.45 – 6.38 (m, 2H), 4.64 – 4.60 (m, 1H), 4.58 – 4.47 (m, 4H), 4.44 – 4.31 (m, 4H), 3.87 (d, *J* = 10.78 Hz, 1H), 3.80 (dd, *J* = 3.81 – 11.20 Hz, 1H), 3.65 – 3.55 (m, 2H), 3.12 – 3.02 (m, 2H), 2.72 – 2.64 (m, 1H), 2.48 (s, 3H), 2.26 – 2.18 (m, 2H), 2.14 – 2.05 (m, 3H), 1.98 – 1.88 (m, 2H), 1.04 (s, 9H). LCMS: expected mass for [M+H]<sup>+</sup> (C<sub>45</sub>H<sub>53</sub>N<sub>10</sub>O<sub>5</sub>S) requires 845.38 m/z, found 845.30 m/z.

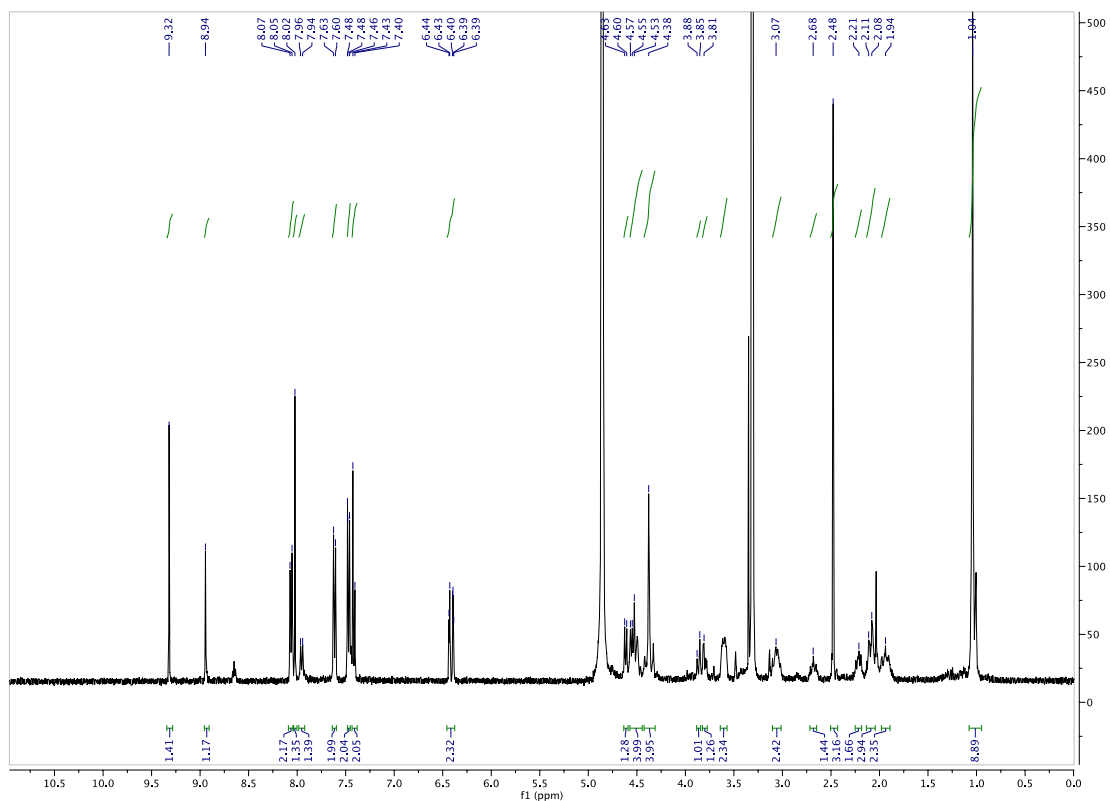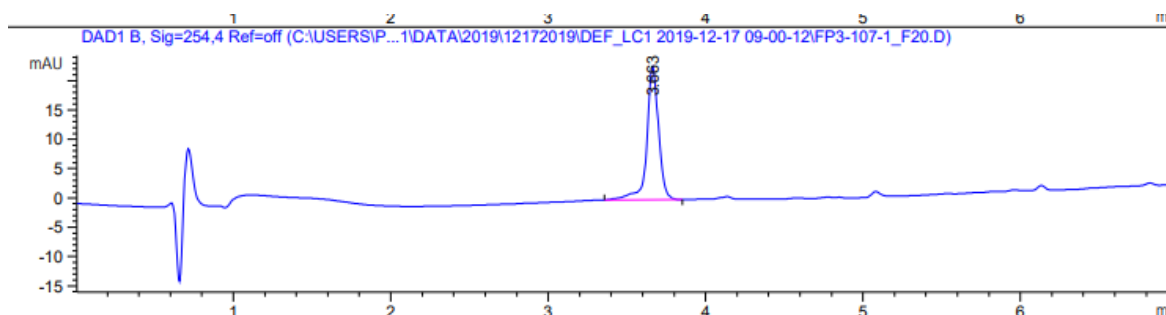

***N*-(2-(2-((6-chlorohexyl)oxy)ethoxy)ethyl)-4-((4-(5-((furan-2-ylmethyl)amino)-[1,2,4]triazolo[4,3-*c*]pyrimidin-8-yl)benzyl)amino)butanamide 2,2,2-trifluoroacetate, UNC7805**

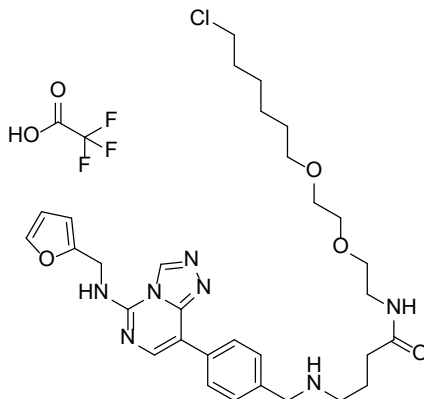

To a flask was added 4-((*tert*-butoxycarbonyl)(4-(5-((furan-2-ylmethyl)amino)-[1,2,4]triazolo[4,3-*c*]pyrimidin-8-yl)benzyl)amino)butanoic acid (**16**) (1.5 mg, 3.0  $\mu$ mol, 1.0 equiv), DIPEA (1.5  $\mu$ L, 8.9  $\mu$ mol,

3.0 equiv), and TBTU (1.2 mg, 3.8  $\mu\text{mol}$ , 1.3 equiv) in DMF (0.5 mL), followed by addition of 2-(2-((6-chlorohexyl)oxy)ethoxy)ethan-1-amine 2,2,2-trifluoroacetate (1.0 mg, 3.0  $\mu\text{mol}$ , 1.0 equiv). The reaction was stirred at room temperature for 16 hr, concentrated *in vacuo* and deprotected with 20% TFA in  $\text{CH}_2\text{Cl}_2$  (0.5 mL). The reaction was concentrated *in vacuo* and purified by reverse phase high performance liquid chromatography (C18, 10-100% MeCN in  $\text{H}_2\text{O}$ , 0.1% TFA). The product was concentrated to yield the desired product as a white solid *N*-(2-(2-((6-chlorohexyl)oxy)ethoxy)ethyl)-4-((4-(5-((furan-2-ylmethyl)amino)-[1,2,4]triazolo[4,3-*c*]pyrimidin-8-yl)benzyl)amino)butanamide 2,2,2-trifluoroacetate (0.38 mg, 18 %).

$^1\text{H}$  NMR ( $\text{CD}_3\text{OD}-d_4$ , 400 MHz):  $\delta$  9.31 (s, 1H), 8.05 (d,  $J = 8.37$  Hz, 2H), 8.00 (s, 1H), 7.60 (d,  $J = 8.36$  Hz, 2H), 7.49 – 7.45 (m, 1H), 6.45 – 6.37 (m, 2H), 4.84 (s, 2H), 4.27 (s, 2H), 3.62 – 3.52 (m, 8H), 3.47 (t,  $J = 6.55$  Hz, 2H), 3.39 (t,  $J = 5.44$  Hz, 2H), 3.14 (t,  $J = 7.27$  Hz, 2H), 2.43 (t,  $J = 6.69$  Hz, 2H), 2.02 – 1.96 (m, 2H), 1.79 – 1.70 (m, 2H), 1.63 – 1.53 (m, 2H), 1.50 – 1.36 (m, 4H). LCMS: expected mass for  $[\text{M}+\text{H}]^+$  ( $\text{C}_{31}\text{H}_{43}\text{ClN}_7\text{O}_4$ ) requires 612.30  $m/z$ , found 612.30  $m/z$ .

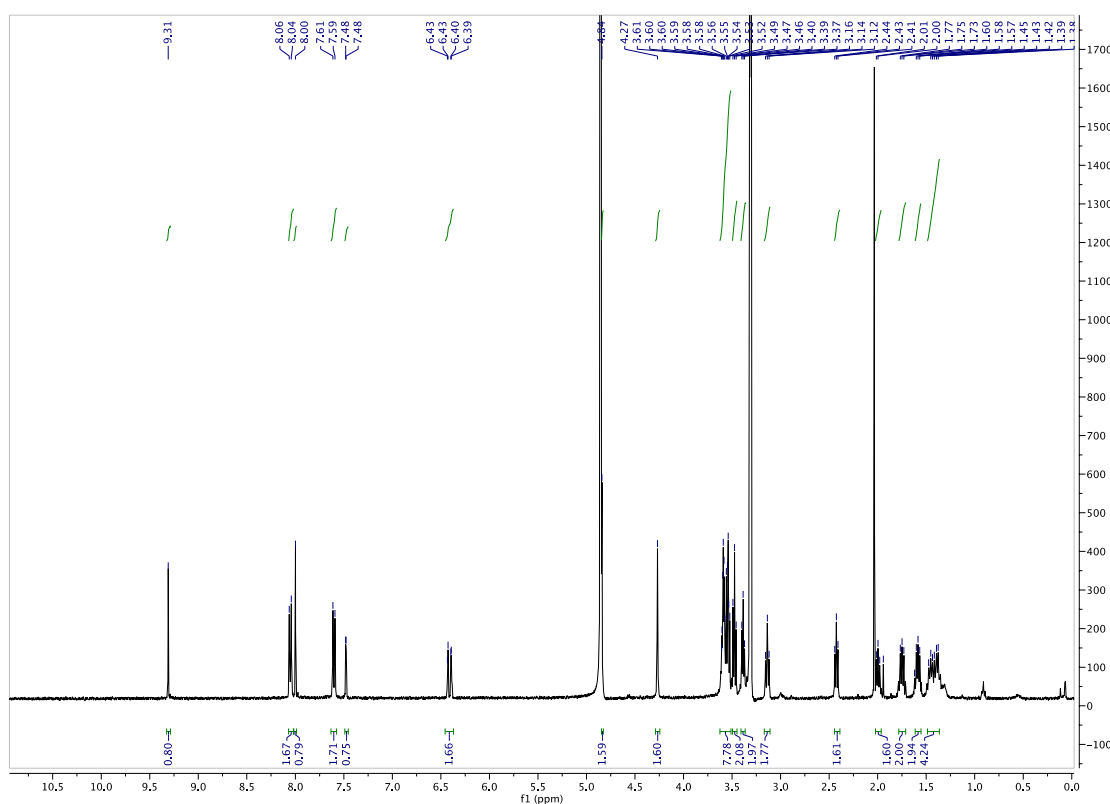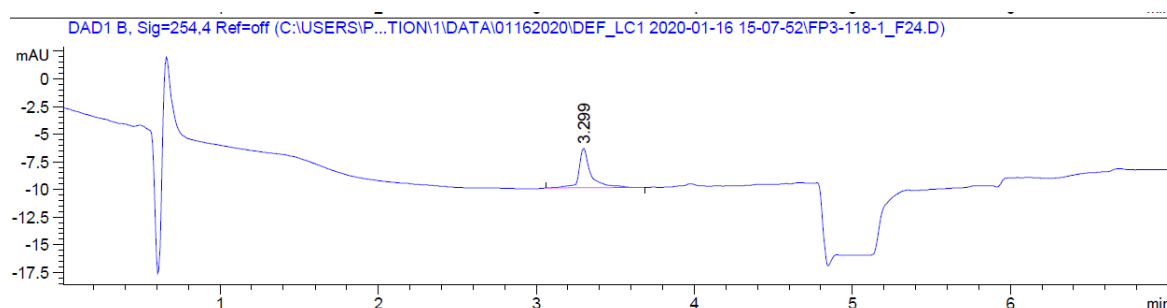



***N*-(2-(2-((6-chlorohexyl)oxy)ethoxy)ethyl)-1-(4-(5-((furan-2-ylmethyl)amino)-[1,2,4]triazolo[4,3-*c*]pyrimidin-8-yl)benzyl)piperidine-4-carboxamide 2,2,2-trifluoroacetate, UNC7806**

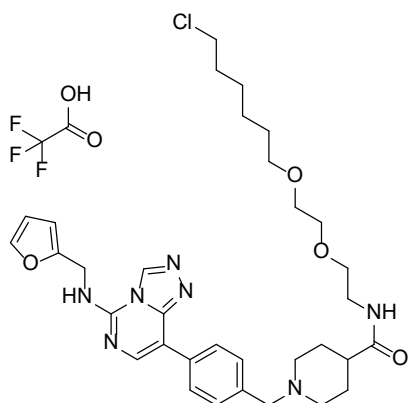

To a flask was added 1-(4-(5-((furan-2-ylmethyl)amino)-[1,2,4]triazolo[4,3-*c*]pyrimidin-8-yl)benzyl)piperidine-4-carboxylic acid (**18**) (0.9 mg, 2.1  $\mu\text{mol}$ , 1.0 equiv), DIPEA (1.1  $\mu\text{L}$ , 6.2  $\mu\text{mol}$ , 3.0 equiv), and TBTU (0.9 mg, 2.7  $\mu\text{mol}$ , 1.3 equiv) in DMF (0.5 mL), followed by addition of 2-(2-((6-chlorohexyl)oxy)ethoxy)ethan-1-amine 2,2,2-trifluoroacetate (0.8 mg, 2.3  $\mu\text{mol}$ , 1.1 equiv). The reaction was stirred at room temperature for 16 hr, concentrated *in vacuo* and purified by reverse phase high performance liquid chromatography (C18, 10-100% MeCN in H<sub>2</sub>O, 0.1% TFA). The product was concentrated to yield the desired product as a white solid *N*-(2-(2-((6-chlorohexyl)oxy)ethoxy)ethyl)-1-(4-(5-((furan-2-ylmethyl)amino)-[1,2,4]triazolo[4,3-*c*]pyrimidin-8-yl)benzyl)piperidine-4-carboxamide 2,2,2-trifluoroacetate (0.49 mg, 31 %).

<sup>1</sup>H NMR (CD<sub>3</sub>OD-*d*<sub>4</sub>, 400 MHz):  $\delta$  9.31 (s, 1H), 8.08 (d, *J* = 8.38 Hz, 2H), 8.01 (s, 1H), 7.61 (d, *J* = 8.10 Hz, 2H), 7.49 – 7.47 (m, 1H), 6.44 – 6.37 (m, 2H), 4.84 (s, 2H), 4.38 (s, 2H), 3.64 – 3.58 (m, 4H), 3.57 – 3.52 (m, 4H), 3.50 – 3.45 (m, 2H), 3.42 – 3.34 (m, 2H), 3.07 (t, *J* = 12.11 Hz, 2H), 2.56 – 2.48 (m, 1H), 2.10 – 2.02 (m, 2H), 1.96 – 1.91 (m, 2H), 1.79 – 1.72 (m, 2H), 1.63 – 1.55 (m, 2H), 1.49 – 1.36 (m, 4H). LCMS: expected mass for [M+H]<sup>+</sup> (C<sub>33</sub>H<sub>45</sub>ClN<sub>7</sub>O<sub>4</sub>) requires 638.31 m/z, found 638.30 m/z.

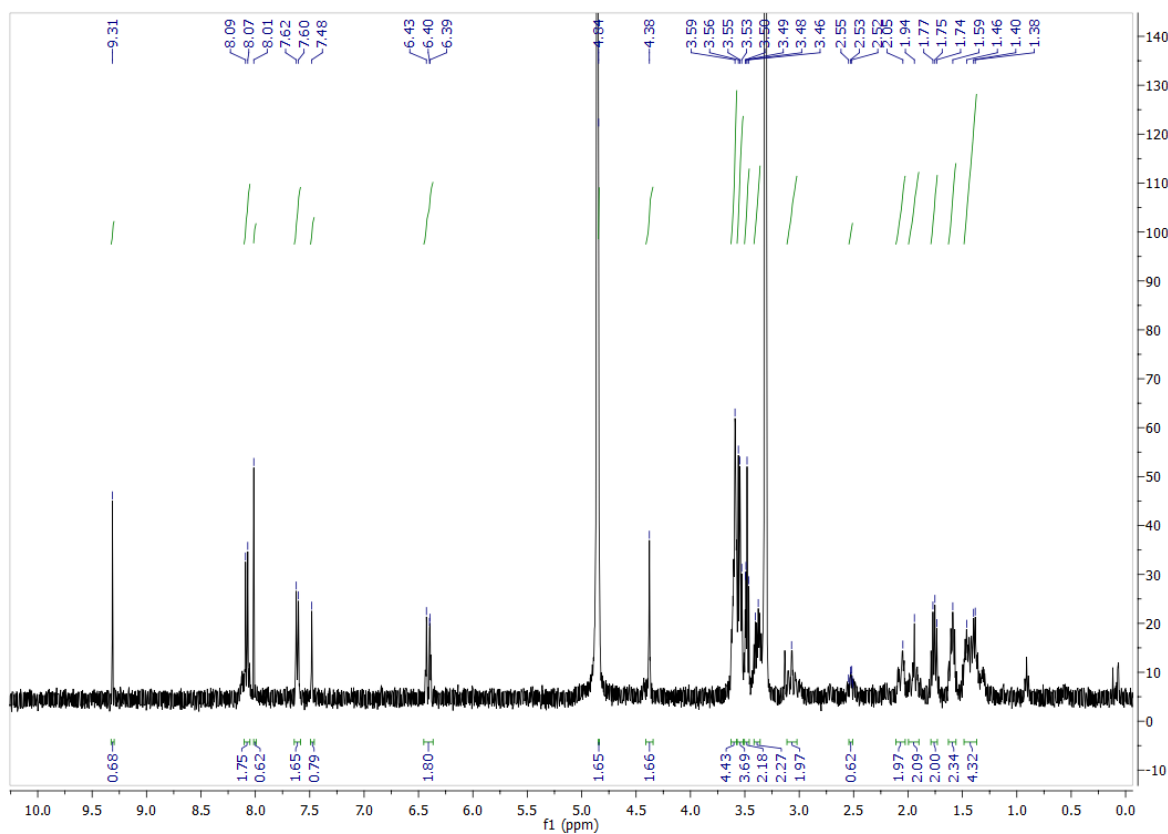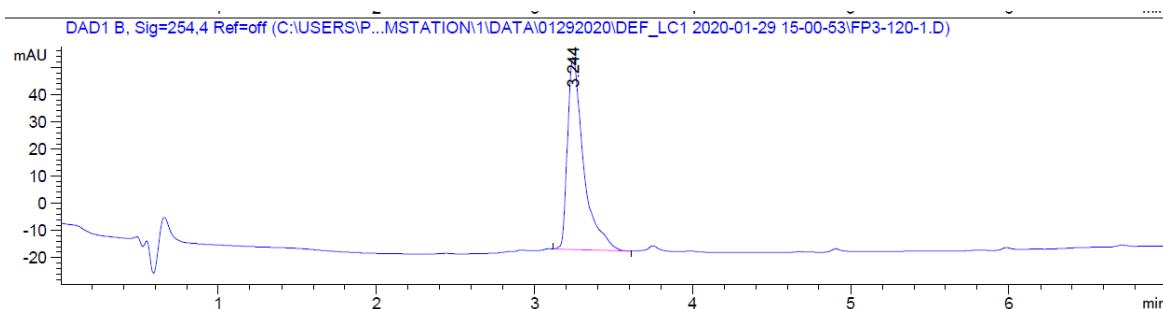

**Methyl 1-((4-(5-((furan-2-ylmethyl)amino)-[1,2,4]triazolo[4,3-c]pyrimidin-8-yl)phenyl)sulfonyl)piperidine-4-carboxylate, 19**

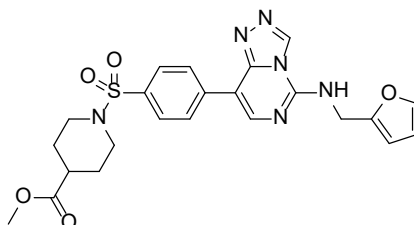

To a microwave vial was added methyl 1-((4-(4,4,5,5-tetramethyl-1,3,2-dioxaborolan-2-yl)phenyl)sulfonyl)piperidine-4-carboxylate (209 mg, 510  $\mu\text{mol}$ , 1.5 equiv), 8-bromo-*N*-(furan-2-ylmethyl)-[1,2,4]triazolo[4,3-*c*]pyrimidin-5-amine (100 mg, 340  $\mu\text{mol}$ , 1.0 equiv), Pd(dppf)Cl<sub>2</sub>·CH<sub>2</sub>Cl<sub>2</sub> (56 mg, 68  $\mu\text{mol}$ , 0.2 equiv), sodium bicarbonate (71.4 mg, 850  $\mu\text{mol}$ , 2.5 equiv) in THF (1 mL) and H<sub>2</sub>O (0.5 mL). The vial was sealed and heated to 90 °C for 16 hr. The reaction was cooled and filtered through celite with EtOAc. The organics were concentrated *in vacuo* to yield the crude product. Crude material was purified by column chromatography (0-10% MeOH in CH<sub>2</sub>Cl<sub>2</sub>) to yield the desired product as a

white solid methyl 1-((4-(5-((furan-2-ylmethyl)amino)-[1,2,4]triazolo[4,3-c]pyrimidin-8-yl)phenyl)sulfonyl)piperidine-4-carboxylate (**19**) (12.7 mg, 8%).

$^1\text{H}$  NMR (DMSO- $d_6$ , 400 MHz):  $\delta$  9.50 (s, 1H), 9.07 (t,  $J = 5.19$  Hz, 1H), 8.43 (d,  $J = 8.59$  Hz, 2H), 8.23 (s, 1H), 7.81 (d,  $J = 8.60$  Hz, 2H), 7.66 – 7.61 (m, 1H), 6.49 – 6.42 (m, 2H), 4.80 (d,  $J = 5.00$  Hz, 2H), 3.61 – 3.54 (m, 5H), 2.48 – 2.37 (m, 3H), 1.95 – 1.88 (m, 2H), 1.57 (dt,  $J = 7.50, 14.86$  Hz, 2H).  $^{13}\text{C}$  NMR (DMSO- $d_6$ , 101 MHz):  $\delta$  174.03, 150.94, 148.27, 144.07, 142.62, 141.87, 138.19, 133.63, 133.10, 127.69, 127.46, 110.63, 109.35, 108.03, 51.54, 45.15, 38.69, 37.75, 27.18. LCMS: expected mass for  $[\text{M}+\text{H}]^+$  ( $\text{C}_{23}\text{H}_{25}\text{N}_6\text{O}_5$ ) requires 497.15 m/z, found 497.15 m/z.

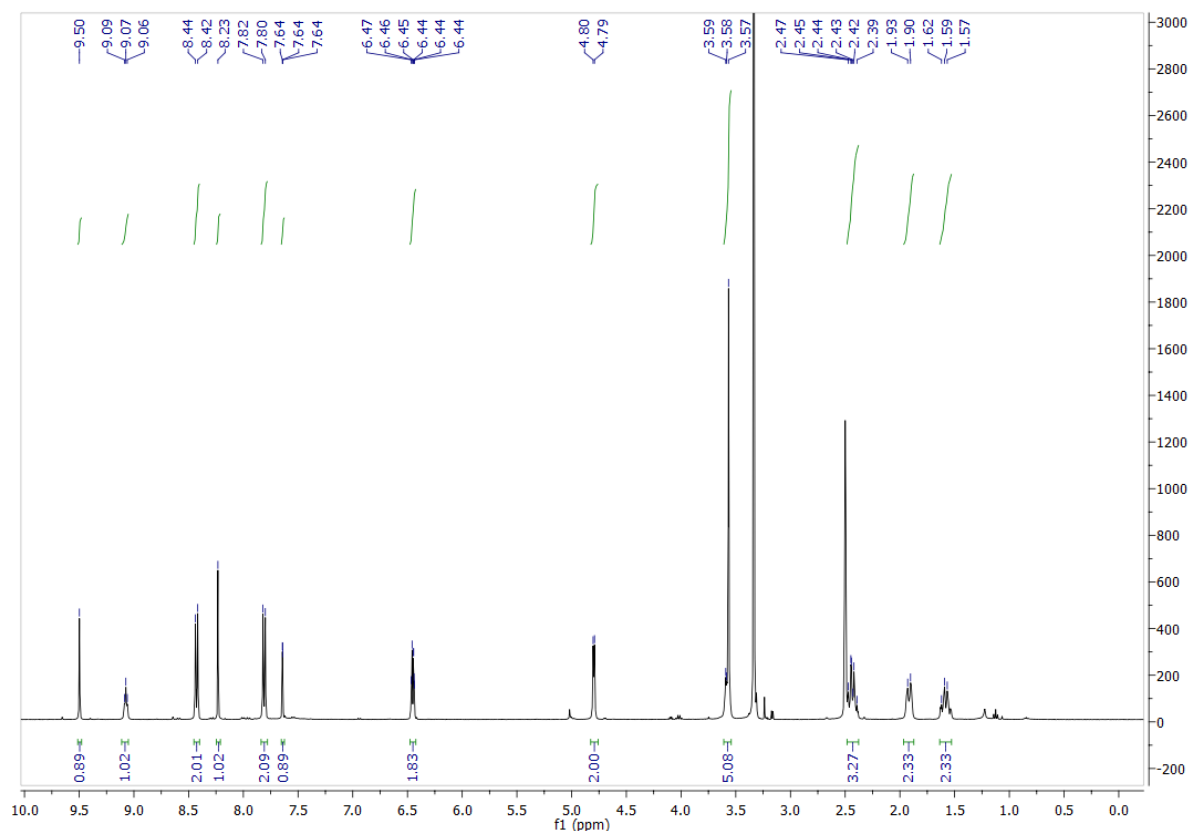

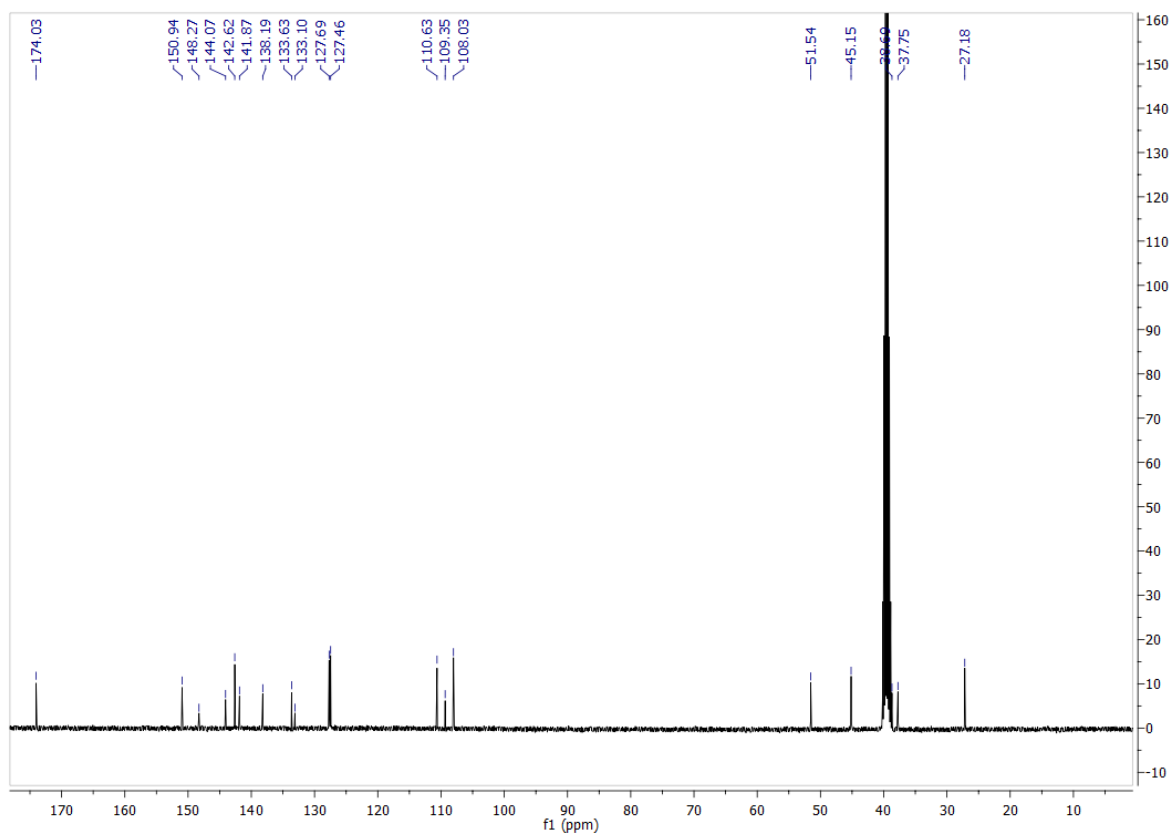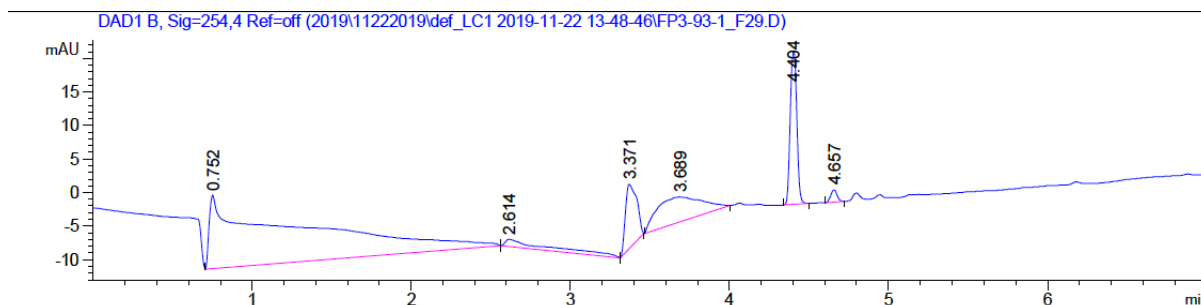

**1-((4-(5-((furan-2-ylmethyl)amino)-[1,2,4]triazolo[4,3-c]pyrimidin-8-yl)phenyl)sulfonyl)piperidine-4-carboxylic acid, 20**

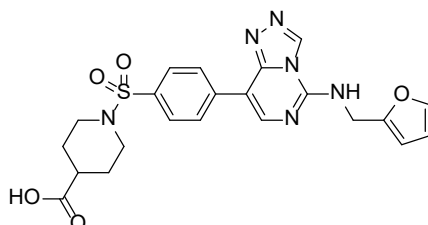

To a flask was added methyl 1-((4-(5-((furan-2-ylmethyl)amino)-[1,2,4]triazolo[4,3-c]pyrimidin-8-yl)phenyl)sulfonyl)piperidine-4-carboxylate (**19**) (12.7 mg, 26  $\mu$ mol, 1.0 equiv) and LiOH.H<sub>2</sub>O (3.2 mg, 76.7  $\mu$ mol, 3.0 equiv) in THF (256  $\mu$ L) and H<sub>2</sub>O (256  $\mu$ L) and the reaction left to stir for 16 hr. The reaction was concentrated *in vacuo* and purified by reverse phase high performance liquid chromatography (10-100% MeCN in H<sub>2</sub>O (+ 0.1% TFA)) to yield the desired product as a white solid 1-((4-(5-((furan-2-ylmethyl)amino)-[1,2,4]triazolo[4,3-c]pyrimidin-8-yl)phenyl)sulfonyl)piperidine-4-carboxylic acid (**20**) (5.8 mg, 47 %).

LCMS: expected mass for  $[M+H]^+$  ( $C_{22}H_{23}N_6O_5S$ ) requires 483.14 m/z, found 483.10 m/z.

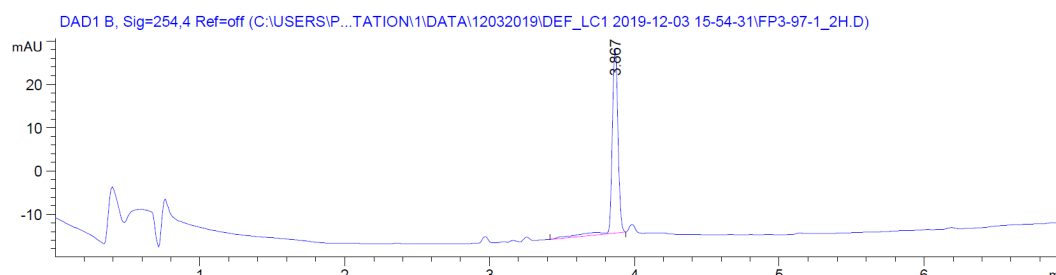

**1-((4-(5-((furan-2-ylmethyl)amino)-[1,2,4]triazolo[4,3-c]pyrimidin-8-yl)phenyl)sulfonyl)-N-((S)-1-((2S,4R)-4-hydroxy-2-((4-(4-methylthiazol-5-yl)benzyl)carbamoyl)pyrrolidin-1-yl)-3,3-dimethyl-1-oxobutan-2-yl)piperidine-4-carboxamide, UNC7741**

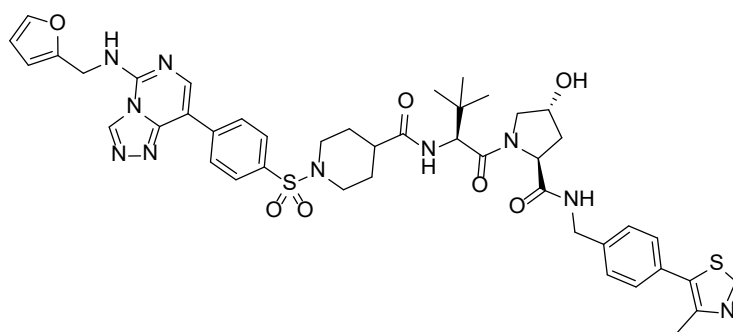

To a flask was added 1-((4-(5-((furan-2-ylmethyl)amino)-[1,2,4]triazolo[4,3-c]pyrimidin-8-yl)phenyl)sulfonyl)piperidine-4-carboxylic acid (**20**) (3.7 mg, 7.7  $\mu$ mol, 1.0 equiv), DIPEA (4  $\mu$ L, 23  $\mu$ mol, 3.0 equiv), and TBTU (3.2 mg, 10  $\mu$ mol, 1.3 equiv) in DMF (1 mL), followed by addition of (2S,4R)-1-((S)-2-((1R,3S)-3-aminocyclobutane-1-carboxamido)-3,3-dimethylbutanoyl)-4-hydroxy-N-(4-(4-methylthiazol-5-yl)benzyl)pyrrolidine-2-carboxamide 2,2,2-trifluoroacetate (4.6 mg, 8.4  $\mu$ mol, 1.1 equiv). The reaction was stirred at room temperature for 16 hr, concentrated *in vacuo* and purified by reverse phase high performance liquid chromatography (C18, 10-100% MeCN in  $H_2O$ , 0.1% TFA) to yield the desired product as a white solid 1-((4-(5-((furan-2-ylmethyl)amino)-[1,2,4]triazolo[4,3-c]pyrimidin-8-yl)phenyl)sulfonyl)-N-((S)-1-((2S,4R)-4-hydroxy-2-((4-(4-methylthiazol-5-yl)benzyl)carbamoyl)pyrrolidin-1-yl)-3,3-dimethyl-1-oxobutan-2-yl)piperidine-4-carboxamide (0.97 mg, 14 %).

$^1H$  NMR ( $CD_3OD-d_4$ , 400 MHz):  $\delta$  9.34 (s, 1H), 9.01 (s, 1H), 8.20 (d,  $J$  = 8.51 Hz, 2H), 8.14 (s, 1H), 7.88 (d,  $J$  = 8.54 Hz, 2H), 7.49 – 7.39 (m, 5H), 6.46 – 6.38 (m, 2H), 4.83 (s, 2H), 4.60 – 4.57 (m, 1H), 4.56 – 4.51 (m, 2H), 4.50 – 4.45 (m, 1H), 4.34 (d,  $J$  = 15.61 Hz, 1H), 3.85 (d,  $J$  = 11.39 Hz, 1H), 3.78 (dd,  $J$  = 3.40, 10.81 Hz, 1H), 2.50 (s, 3H), 2.47 – 2.39 (m, 2H), 2.37 – 2.29 (m, 1H), 2.23 – 2.17 (m, 1H), 2.10 – 2.04 (m, 1H), 1.90 – 1.70 (m, 6H), 1.00 (s, 9H). LCMS: expected mass for  $[M+H]^+$  ( $C_{44}H_{51}N_{10}O_7 S_2$ ) requires 895.33 m/z, found 895.20 m/z.

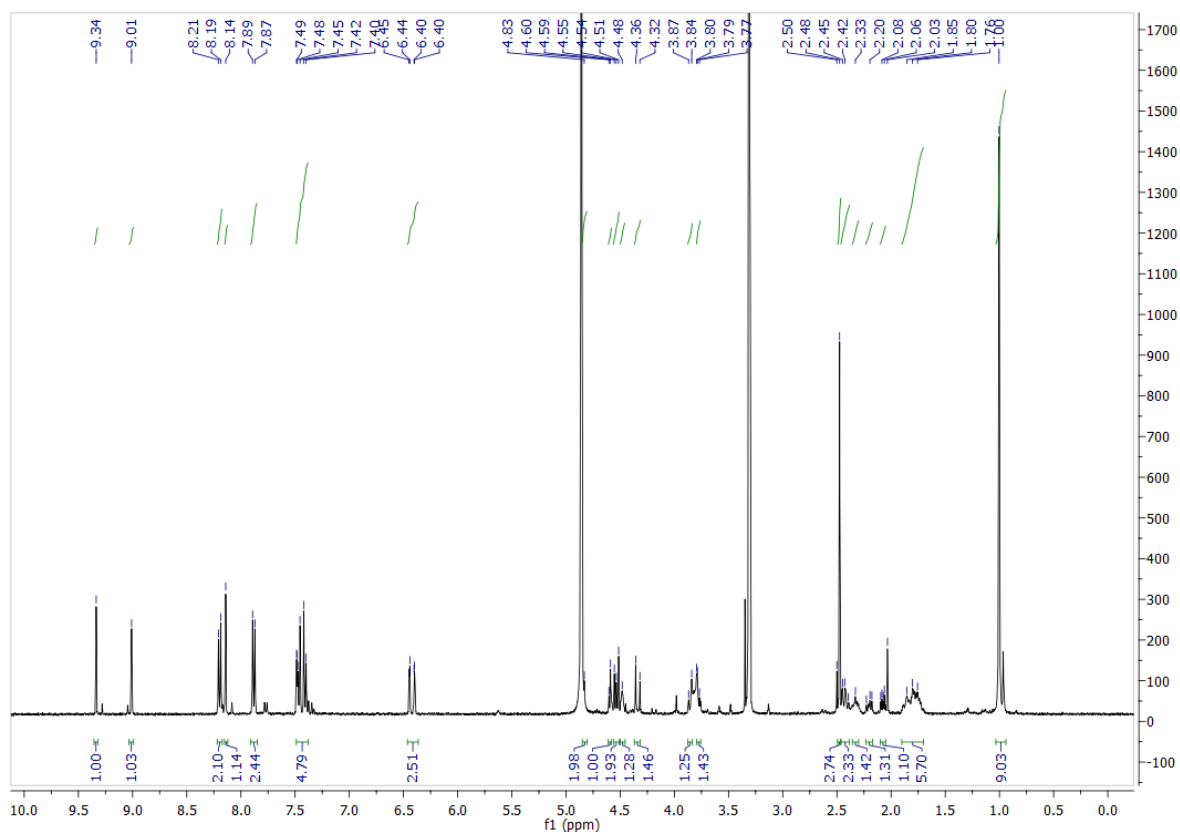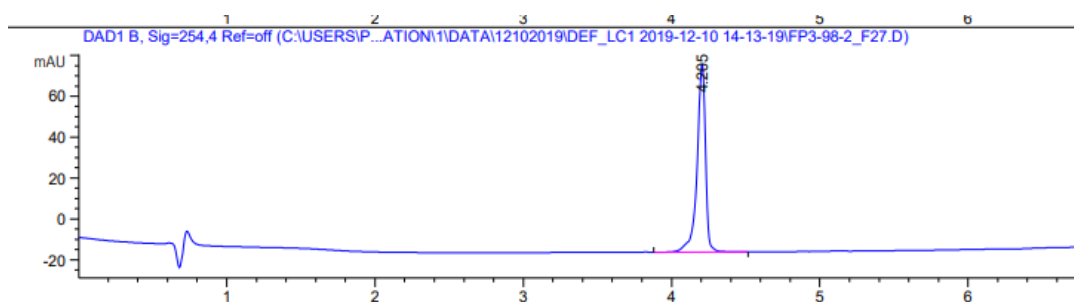

***N*-(2-(2-((6-chlorohexyl)oxy)ethoxy)ethyl)-1-((4-(5-((furan-2-ylmethyl)amino)-[1,2,4]triazolo[4,3-c]pyrimidin-8-yl)phenyl)sulfonyl)piperidine-4-carboxamide, UNC7793**

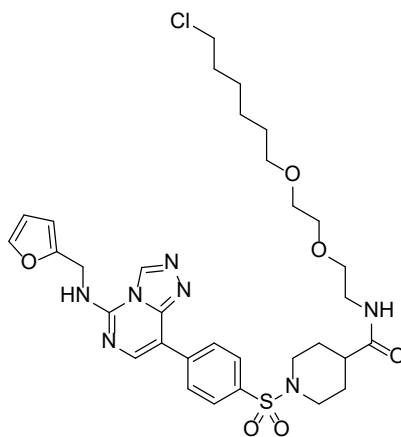

To a flask was added 1-((4-(5-((furan-2-ylmethyl)amino)-[1,2,4]triazolo[4,3-c]pyrimidin-8-yl)phenyl)sulfonyl)piperidine-4-carboxylic acid (**20**) (2.1 mg, 4.4  $\mu$ mol, 1.0 equiv), DIPEA (2.3  $\mu$ L, 13

$\mu\text{mol}$ , 3.0 equiv), and TBTU (1.8 mg, 5.7  $\mu\text{mol}$ , 1.3 equiv) in DMF (0.5 mL), followed by addition of 2-((6-chlorohexyl)oxy)ethoxy)ethan-1-amine 2,2,2-trifluoroacetate (1.6 mg, 4.8  $\mu\text{mol}$ , 1.1 equiv). The reaction was stirred at room temperature for 16 hr, concentrated *in vacuo* and purified by reverse phase high performance liquid chromatography (C18, 10-100% MeCN in H<sub>2</sub>O, 0.1% TFA) to yield the desired product as a white solid *N*-(2-(2-((6-chlorohexyl)oxy)ethoxy)ethyl)-1-((4-(5-((furan-2-ylmethyl)amino)-[1,2,4]triazolo[4,3-*c*]pyrimidin-8-yl)phenyl)sulfonyl)piperidine-4-carboxamide (0.97 mg, 32 %).

<sup>1</sup>H NMR (CD<sub>3</sub>OD-*d*<sub>4</sub>, 400 MHz):  $\delta$  9.32 (s, 1H), 8.23 (d, *J* = 8.58 Hz, 2H), 8.11 (s, 1H), 7.87 (d, *J* = 8.56 Hz, 2H), 7.50 – 7.46 (m, 1H), 6.45 – 6.37 (m, 2H), 3.81 (m, 2H), 3.59 – 3.43 (m, 10H), 3.36 – 3.33 (m, 2H), 2.41 (td, *J* = 2.72, 11.66, 11.65 Hz, 2H), 2.21 – 2.10 (m, 2H), 1.89 – 1.69 (m, 7H), 1.57 (dt, *J* = 6.73, 13.79 Hz, 2H), 1.48 – 1.33 (m, 5H). LCMS: expected mass for [M+H]<sup>+</sup> (C<sub>32</sub>H<sub>43</sub>ClN<sub>7</sub>O<sub>6</sub>S) requires 688.26 m/z, found 688.15 m/z.

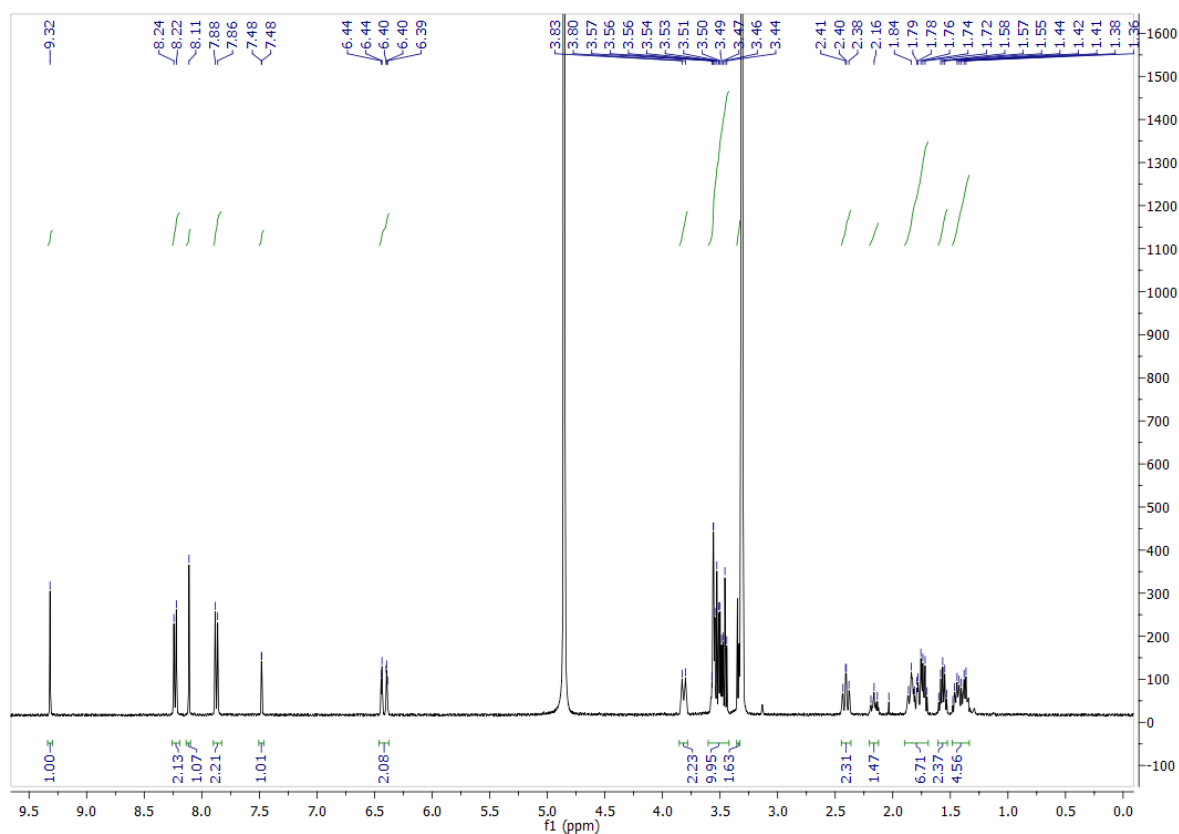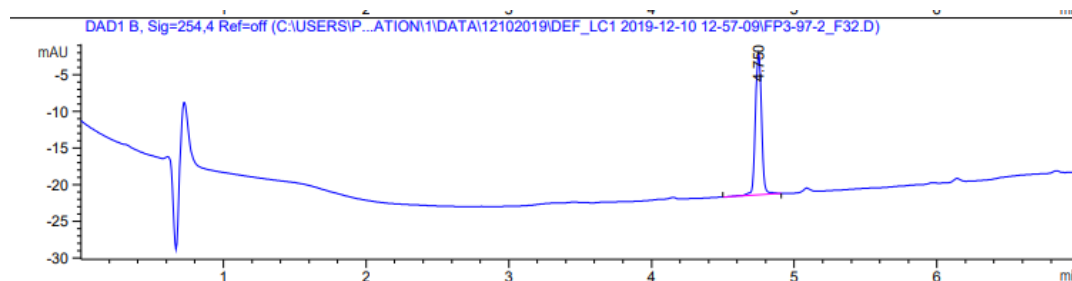

**Methyl 1-(4-(5-((furan-2-ylmethyl)amino)-[1,2,4]triazolo[4,3-c]pyrimidin-8-yl)benzoyl)piperidine-4-carboxylate, 22**

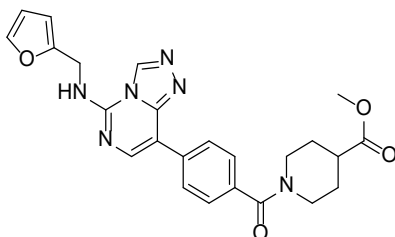

To a flask was added 1-((4-(5-((furan-2-ylmethyl)amino)-[1,2,4]triazolo[4,3-c]pyrimidin-8-yl)phenyl)sulfonyl)piperidine-4-carboxylic acid (**9**) (20 mg, 60  $\mu$ mol, 1.0 equiv), DIPEA (31  $\mu$ L, 180  $\mu$ mol, 3.0 equiv), and TBTU (25 mg, 78  $\mu$ mol, 1.3 equiv) in DMF (0.6 mL), followed by addition of methyl piperidine-4-carboxylate 2,2,2-trifluoroacetate (17 mg, 66  $\mu$ mol, 1.1 equiv). The reaction was stirred at room temperature for 16 hr, concentrated *in vacuo* and purified by normal phase column chromatography (0-10% MeOH in  $\text{CH}_2\text{Cl}_2$ ) to yield the desired product as a white solid methyl 1-(4-(5-((furan-2-ylmethyl)amino)-[1,2,4]triazolo[4,3-c]pyrimidin-8-yl)benzoyl)piperidine-4-carboxylate (**22**) (15.3 mg, 56 %).

$^1\text{H}$  NMR ( $\text{CD}_3\text{OD}-d_4$ , 400 MHz):  $\delta$  9.29 (s, 1H), 8.04 (d,  $J = 8.42$  Hz, 2H), 8.00 (s, 1H), 7.52 (d,  $J = 8.41$  Hz, 2H), 7.48 – 7.45 (m, 1H), 6.44 – 6.36 (m, 2H), 4.83 (s, 2H), 4.53 – 4.43 (m, 1H), 3.84 – 3.76 (m, 1H), 3.69 (s, 3H), 3.17 – 3.03 (m, 1H), 2.10 – 2.00 (m, 1H), 1.94 – 1.86 (m, 1H), 1.77 – 1.59 (m, 4H).  $^{13}\text{C}$  NMR ( $\text{CD}_3\text{OD}-d_4$ , 101 MHz):  $\delta$  176.26, 172.22, 143.68, 142.94, 136.57, 136.13, 128.98, 128.34, 111.51, 109.15, 54.80, 52.34, 49.85, 41.87, 39.29. LCMS: expected mass for  $[\text{M}+\text{H}]^+$  ( $\text{C}_{24}\text{H}_{25}\text{N}_6\text{O}_4$ ) requires 461.19 m/z, found 461.20 m/z.

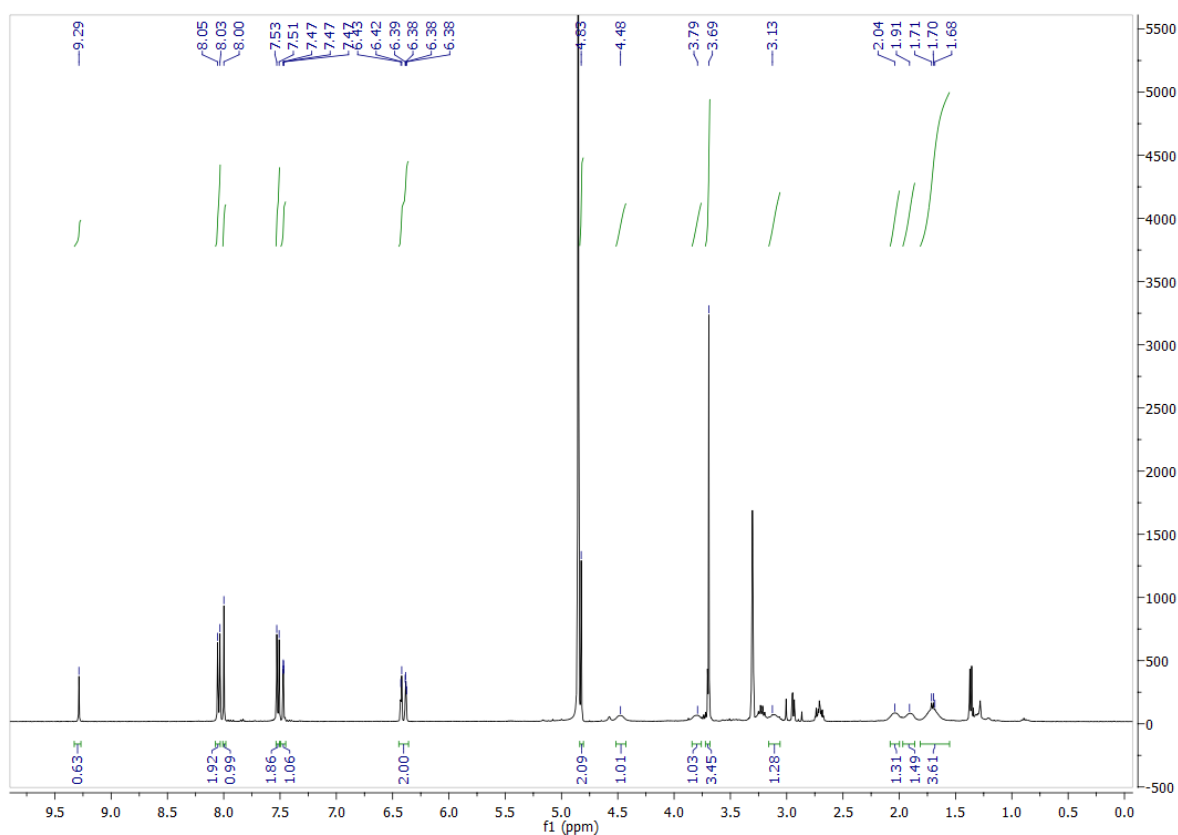



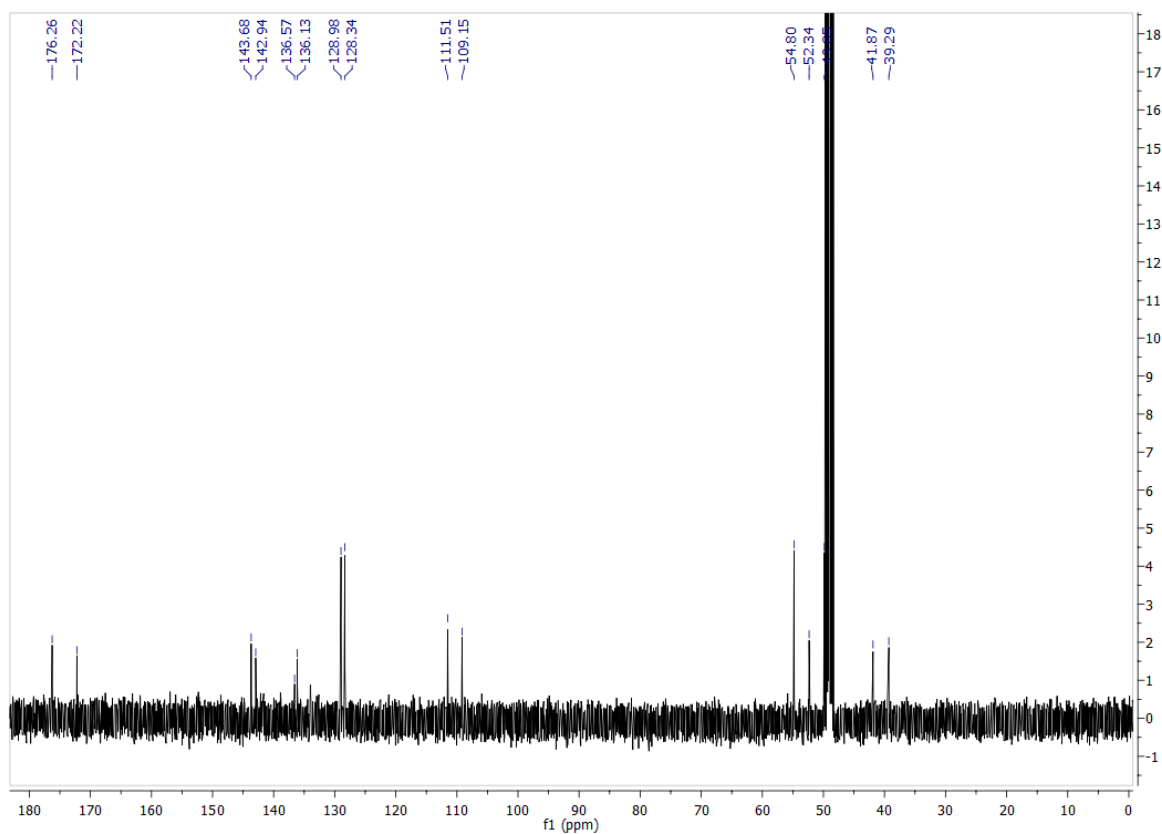

DAD1 B, Sig=254,4 Ref=off (C:\USERS\IP...MSTATION1\DATA\01132020\DEF\_LC1 2020-01-13 08-42-57\FP3-110-1.D)

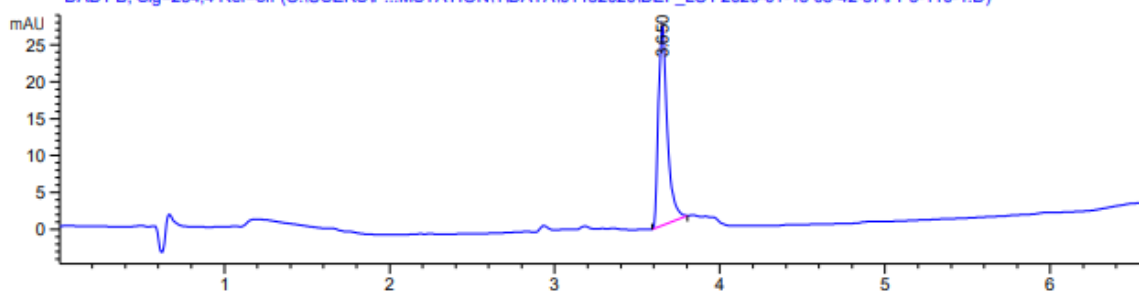

#### 4-(4-(5-((furan-2-ylmethyl)amino)-[1,2,4]triazolo[4,3-c]pyrimidin-8-yl)phenyl)sulfonylpiperidine-4-carboxylic acid, 23

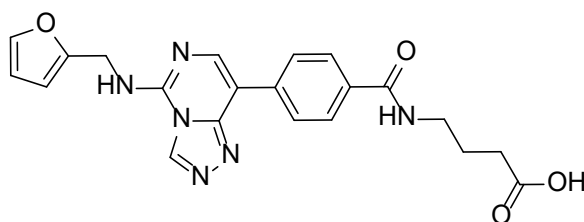

To a flask was added 1-((4-(5-((furan-2-ylmethyl)amino)-[1,2,4]triazolo[4,3-c]pyrimidin-8-yl)phenyl)sulfonyl)piperidine-4-carboxylic acid (**9**) (50.8 mg, 151  $\mu$ mol, 1.0 equiv), DIPEA (80  $\mu$ L, 453  $\mu$ mol, 3.0 equiv), and TBTU (62.2 mg, 194  $\mu$ mol, 1.3 equiv) in DMF (0.5 mL), followed by addition of methyl 4-aminobutanoate 2,2,2-trifluoroacetate (42.9 mg, 186  $\mu$ mol, 1.22 equiv) in DMF (1.0 mL). The reaction was stirred at room temperature for 16 hr, concentrated *in vacuo* and purified by column chromatography (0-10% MeOH in  $\text{CH}_2\text{Cl}_2$ ). The product was concentrated to yield the desired product

as a clear gum methyl 4-(4-(5-((furan-2-ylmethyl)amino)-[1,2,4]triazolo[4,3-c]pyrimidin-8-yl)benzamido)butanoate (**21**).

LCMS: expected mass for  $[M+H]^+$  ( $C_{22}H_{23}N_6O_4$ ) requires 435.17 m/z, found 435.20 m/z.

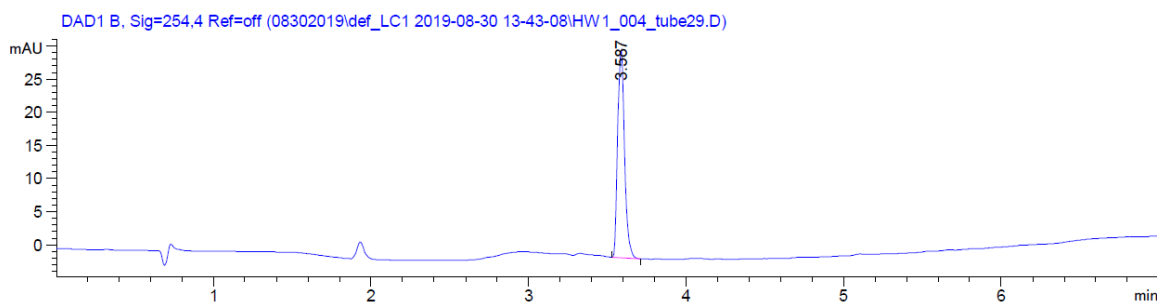

Intermediate methyl 4-(4-(5-((furan-2-ylmethyl)amino)-[1,2,4]triazolo[4,3-c]pyrimidin-8-yl)benzamido)butanoate (**21**) was telescoped into the next step. To a flask was added methyl 4-(4-(5-((furan-2-ylmethyl)amino)-[1,2,4]triazolo[4,3-c]pyrimidin-8-yl)benzamido)butanoate, LiOH.H<sub>2</sub>O (23.9 mg, 570  $\mu$ mol, 3.8 equiv) in THF (1.2 mL) and H<sub>2</sub>O (0.3 mL) and the reaction was stirred at 50 °C for 3 hr. THF was removed *in vacuo* and 1M HCl was added, the precipitate was filtered under vacuum and washed with H<sub>2</sub>O then Et<sub>2</sub>O to yield the desired product as a beige solid 4-(4-(5-((furan-2-ylmethyl)amino)-[1,2,4]triazolo[4,3-c]pyrimidin-8-yl)benzamido)butanoic acid (**22**) (44.5 mg, 70%) over two steps.

<sup>1</sup>H NMR (DMSO-*d*<sub>6</sub>, 400 MHz):  $\delta$  9.50 (s, 1H), 8.99 (t,  $J = 5.27$  Hz, 1H), 8.52 (t,  $J = 5.61$  Hz, 1H), 8.24 (d,  $J = 8.49$  Hz, 2H), 8.17 (s, 1H), 7.94 (d,  $J = 8.50$  Hz, 2H), 7.65 – 7.62 (m, 1H), 6.44 (m, 2H), 4.79 (d,  $J = 5.18$  Hz, 2H), 3.32 – 3.27 (m, 2H), 2.29 (t,  $J = 7.35$  Hz, 2H), 1.82 – 1.74 (m, 2H).

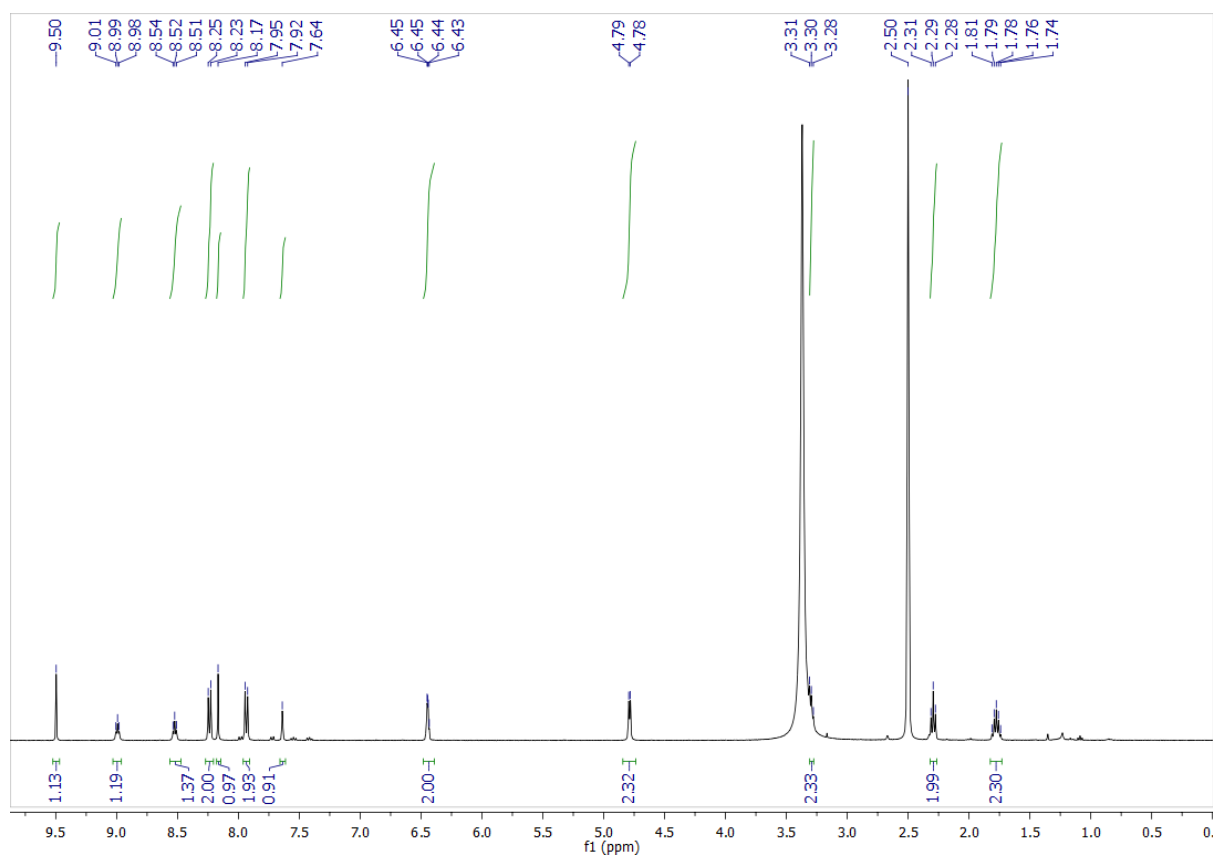

**(1S,3S)-3-(4-(5-((furan-2-ylmethyl)amino)-[1,2,4]triazolo[4,3-c]pyrimidin-8-yl)benzamido)cyclobutane-1-carboxylic acid, 25**

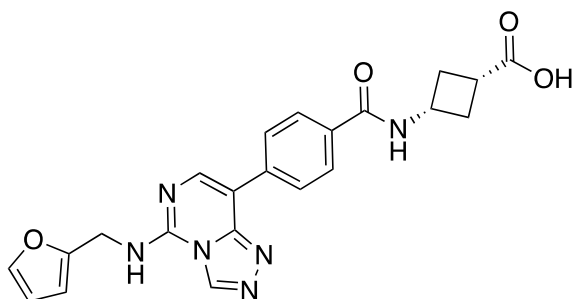

To a flask was added 1-((4-(5-((furan-2-ylmethyl)amino)-[1,2,4]triazolo[4,3-c]pyrimidin-8-yl)phenyl)sulfonyl)piperidine-4-carboxylic acid (**9**) (20 mg, 60  $\mu\text{mol}$ , 1.0 equiv), DIPEA (33  $\mu\text{L}$ , 192  $\mu\text{mol}$ , 3.2 equiv), and TBTU (25 mg, 78  $\mu\text{mol}$ , 1.3 equiv) in DMF (0.5 mL), followed by addition of methyl (1S,3S)-3-aminocyclobutane-1-carboxylate 2,2,2-trifluoroacetate (16 mg, 66  $\mu\text{mol}$ , 1.1 equiv). The reaction was stirred at room temperature for 16 hr, concentrated *in vacuo* and purified by column chromatography (0-10% MeOH in  $\text{CH}_2\text{Cl}_2$ ). The product was concentrated to yield the desired product as a clear gum. Intermediate methyl (1S,3S)-3-(4-(5-((furan-2-ylmethyl)amino)-[1,2,4]triazolo[4,3-c]pyrimidin-8-yl)benzamido)cyclobutane-1-carboxylate was telescoped into the next step. To a flask was added methyl (1S,3S)-3-(4-(5-((furan-2-ylmethyl)amino)-[1,2,4]triazolo[4,3-c]pyrimidin-8-yl)benzamido)cyclobutane-1-carboxylate, LiOH.H<sub>2</sub>O (7.5 mg, 180  $\mu\text{mol}$ , 3.0 equiv) in THF (0.24 mL) and H<sub>2</sub>O (54  $\mu\text{L}$ ) and the reaction was stirred at 50 °C for 16 hr. THF was removed *in vacuo* and 1M HCl was added, the crude material concentrated *in vacuo* and purified by reverse phase high performance liquid chromatography (C18, 10-100% MeCN in H<sub>2</sub>O, 0.1% TFA) to yield the desired product as a white solid (1S,3S)-3-(4-(5-((furan-2-ylmethyl)amino)-[1,2,4]triazolo[4,3-c]pyrimidin-8-yl)benzamido)cyclobutane-1-carboxylic acid (**25**) (9.4 mg, 36%) over two steps.

<sup>1</sup>H NMR ( $\text{CD}_3\text{OD}-d_4$ , 400 MHz):  $\delta$  9.33 (s, 1H), 8.07 – 8.01 (m, 3H), 7.93 (d,  $J = 8.46$ , 2H), 7.49 – 7.45 (m, 1H), 6.44 – 6.36 (m, 2H), 4.83 (s, 2H), 4.53 – 4.43 (m, 1H), 2.95 – 2.86 (m, 1H), 2.65 (ddd,  $J = 2.64, 7.84, 15.65$ , 2H), 2.41 – 2.29 (m, 2H). <sup>13</sup>C NMR ( $\text{CD}_3\text{OD}-d_4$ , 101 MHz):  $\delta$  178.21, 169.13, 163.41, 163.07, 162.70, 152.28, 143.67, 143.25, 138.11, 134.42, 128.81, 128.69, 111.51, 109.16, 42.42, 39.29, 34.57, 32.70. LCMS: expected mass for  $[\text{M}+\text{H}]^+$  ( $\text{C}_{22}\text{H}_{21}\text{N}_6\text{O}_4$ ) requires 433.15 m/z, found 433.20 m/z.

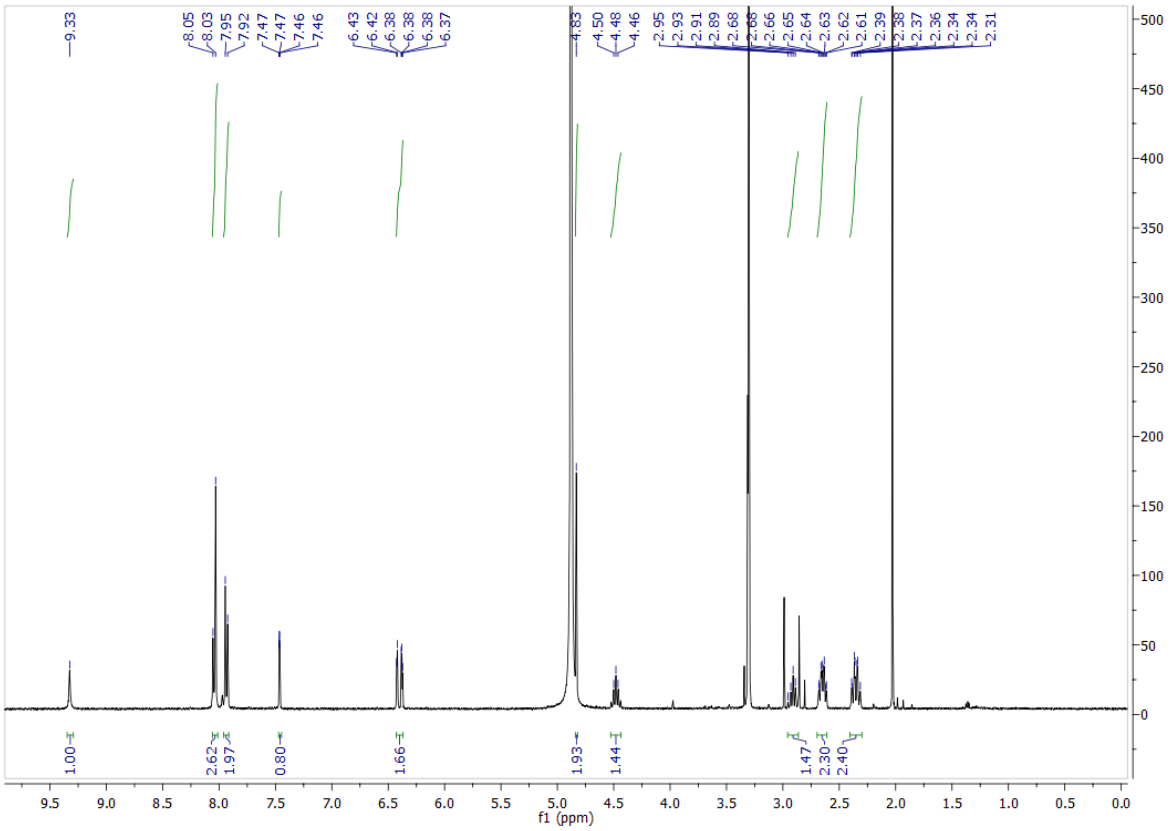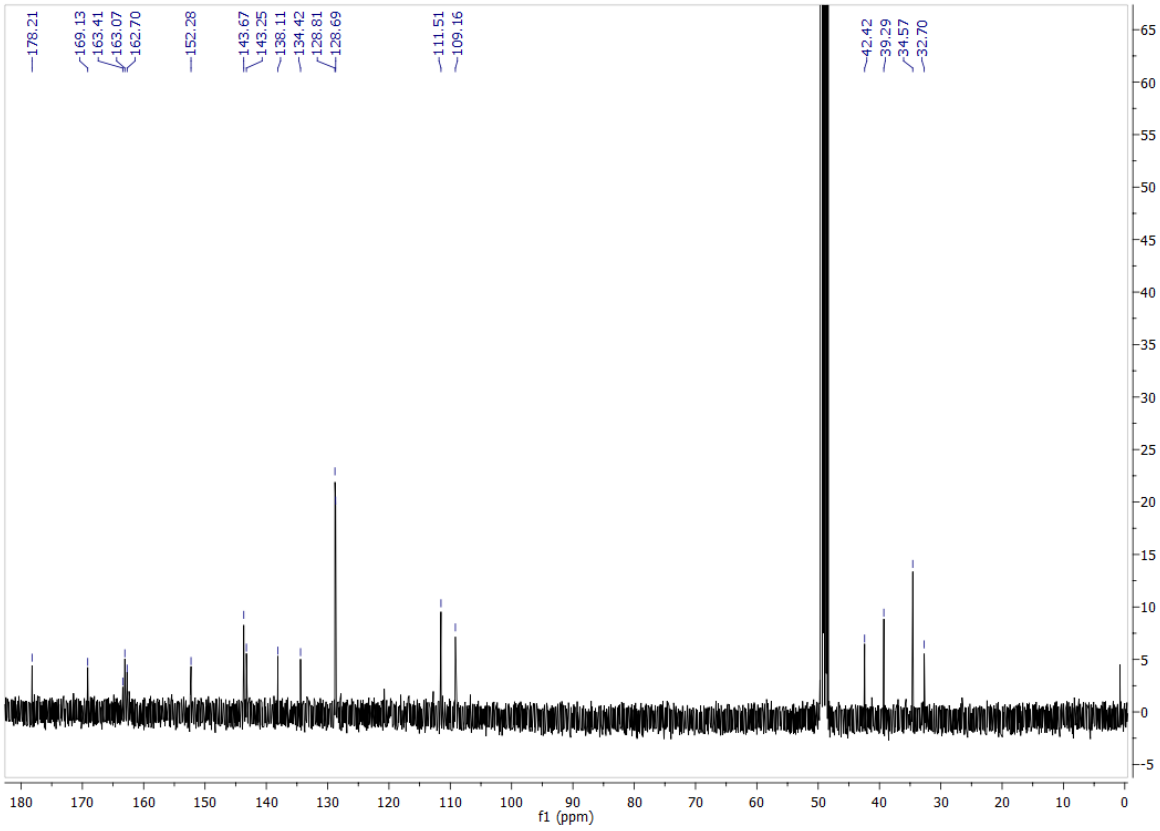

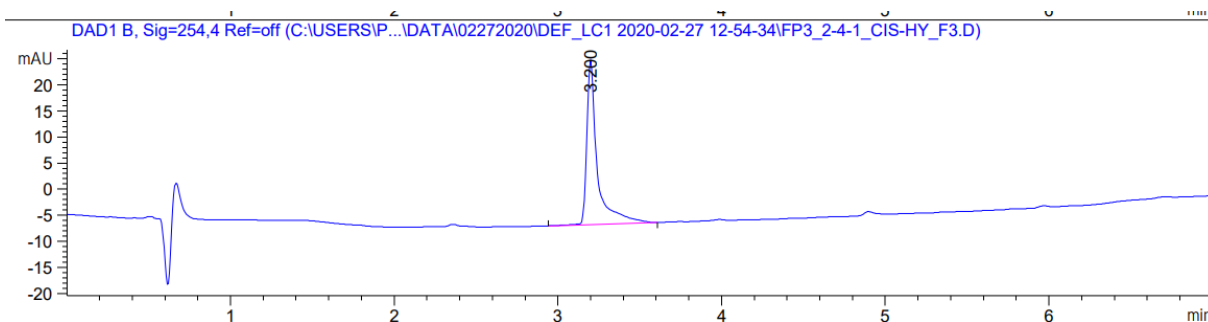

**(1*R*,3*R*)-3-(4-(5-((furan-2-ylmethyl)amino)-[1,2,4]triazolo[4,3-*c*]pyrimidin-8-yl)benzamido)cyclobutane-1-carboxylic acid, **26****

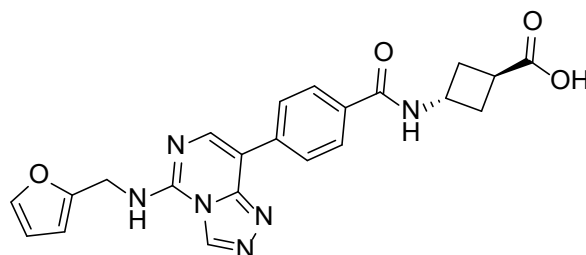

To a flask was added 1-((4-(5-((furan-2-ylmethyl)amino)-[1,2,4]triazolo[4,3-*c*]pyrimidin-8-yl)phenyl)sulfonyl)piperidine-4-carboxylic acid (**9**) (10 mg, 30  $\mu$ mol, 1.0 equiv), DIPEA (17  $\mu$ L, 95  $\mu$ mol, 3.2 equiv), and TBTU (12 mg, 39  $\mu$ mol, 1.3 equiv) in DMF (0.3 mL), followed by addition of methyl (1*R*,3*R*)-3-aminocyclobutane-1-carboxylate 2,2,2-trifluoroacetate (8 mg, 33  $\mu$ mol, 1.1 equiv). The reaction was stirred at room temperature for 16 hr, concentrated *in vacuo* and purified by column chromatography (0-10% MeOH in  $\text{CH}_2\text{Cl}_2$ ). The product was concentrated to yield the desired product as a clear gum. Intermediate methyl (1*R*,3*R*)-3-(4-(5-((furan-2-ylmethyl)amino)-[1,2,4]triazolo[4,3-*c*]pyrimidin-8-yl)benzamido)cyclobutane-1-carboxylate was telescoped into the next step. To a flask was added methyl (1*R*,3*R*)-3-(4-(5-((furan-2-ylmethyl)amino)-[1,2,4]triazolo[4,3-*c*]pyrimidin-8-yl)benzamido)cyclobutane-1-carboxylate, LiOH·H<sub>2</sub>O (3.8 mg, 89  $\mu$ mol, 3.0 equiv) in THF (0.12 mL) and H<sub>2</sub>O (27  $\mu$ L) and the reaction was stirred at 50 °C for 16 hr. THF was removed *in vacuo* and 1M HCl was added, the crude material concentrated *in vacuo* and purified by reverse phase high performance liquid chromatography (C18, 10-100% MeCN in H<sub>2</sub>O, 0.1% TFA) to yield the desired product as a white solid (1*R*,3*R*)-3-(4-(5-((furan-2-ylmethyl)amino)-[1,2,4]triazolo[4,3-*c*]pyrimidin-8-yl)benzamido)cyclobutane-1-carboxylic acid (**26**) (3 mg, 20%) over two steps.

<sup>1</sup>H NMR (DMSO-*d*<sub>6</sub>, 400 MHz):  $\delta$  12.22 (s, 1H), 9.48 (s, 1H), 8.98 (t, *J* = 5.44 Hz, 1H), 8.73 (d, *J* = 7.48 Hz, 1H), 8.25 (d, *J* = 8.54 Hz, 2H), 8.17 (s, 1H), 7.94 (d, *J* = 8.56 Hz, 2H), 7.66 – 7.62 (m, 1H), 6.47 – 6.41 (m, 2H), 4.79 (d, *J* = 5.34 Hz, 2H), 4.63 – 4.54 (m, 1H), 3.02 – 2.94 (m, 1H), 2.48 – 2.41 (m, 2H), 2.41 – 2.33 (m, 2H). <sup>13</sup>C NMR (DMSO-*d*<sub>6</sub>, 101 MHz):  $\delta$  186.20, 174.62, 160.57, 157.92, 153.22, 152.05, 150.46, 145.69, 142.47, 142.27, 136.95, 136.10, 120.11, 119.72, 117.42, 52.34, 47.21, 42.10, 41.75. LCMS: expected mass for [M+H]<sup>+</sup> (C<sub>22</sub>H<sub>21</sub>N<sub>6</sub>O<sub>4</sub>) requires 433.15 m/z, found 433.20 m/z.

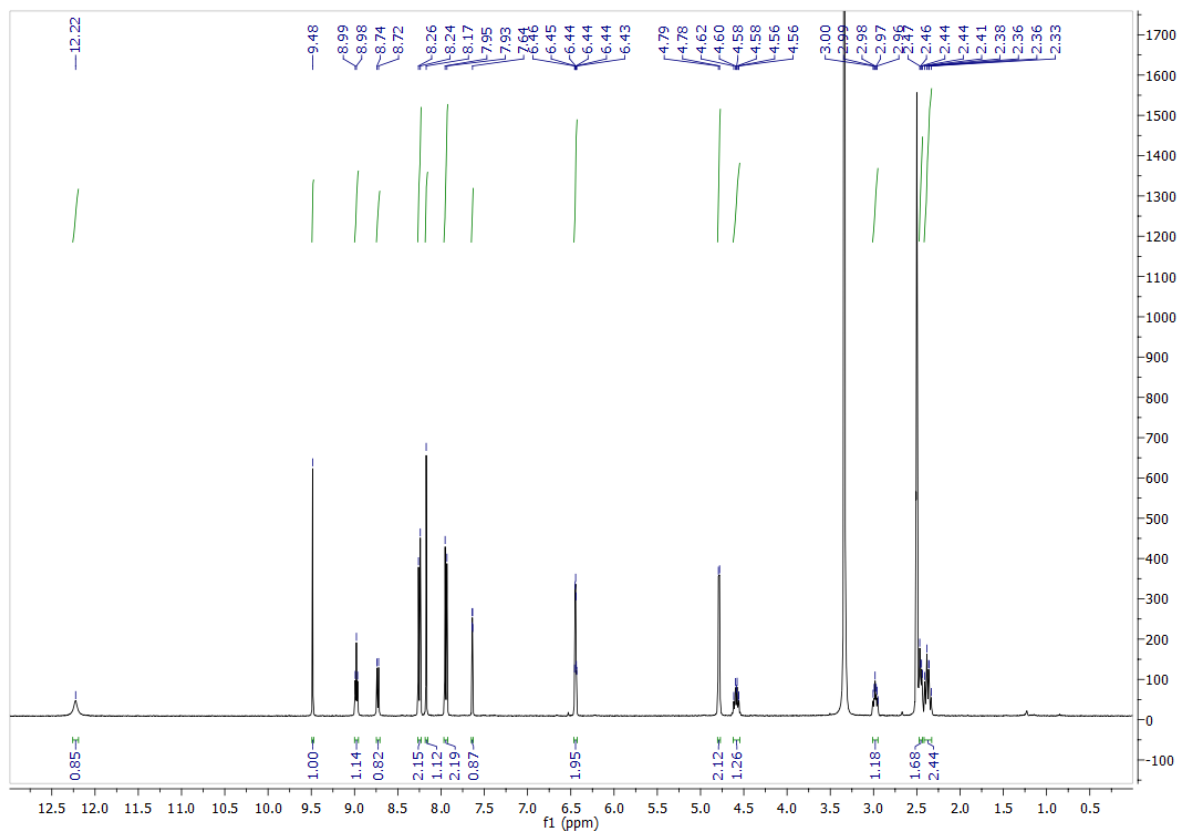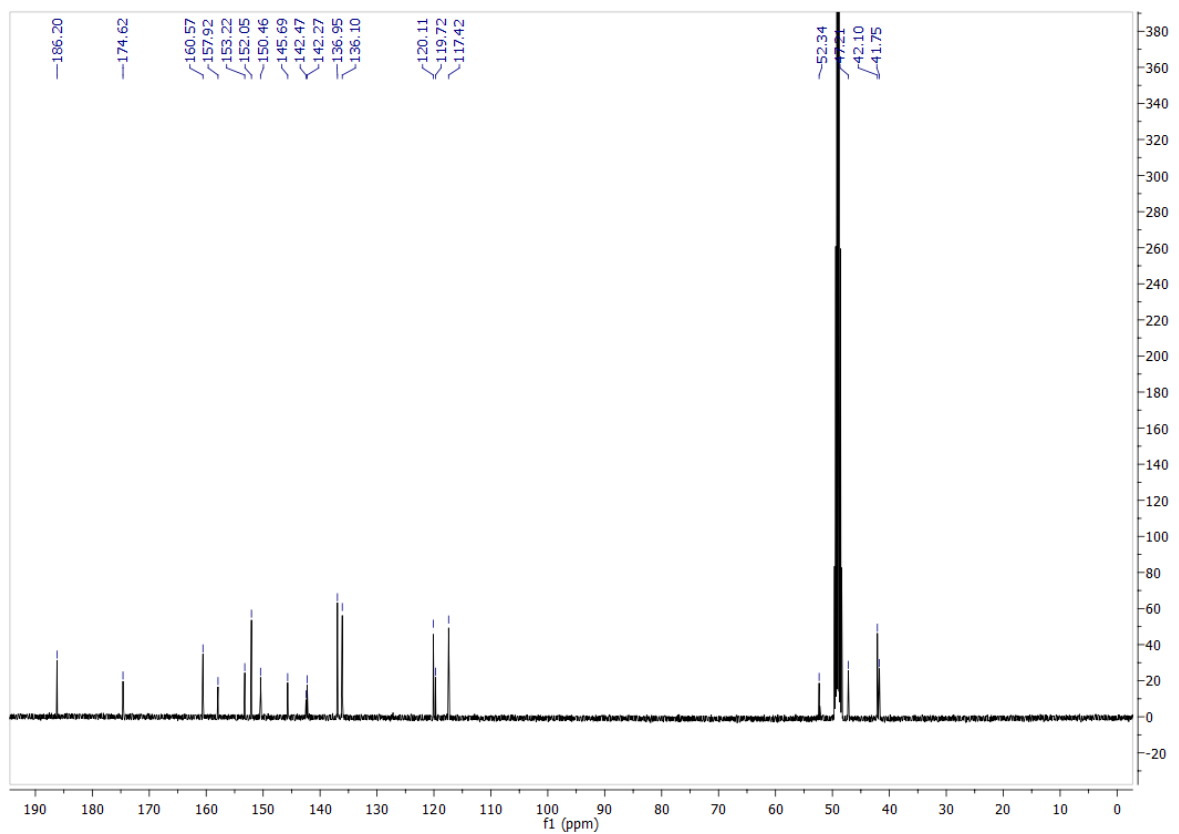

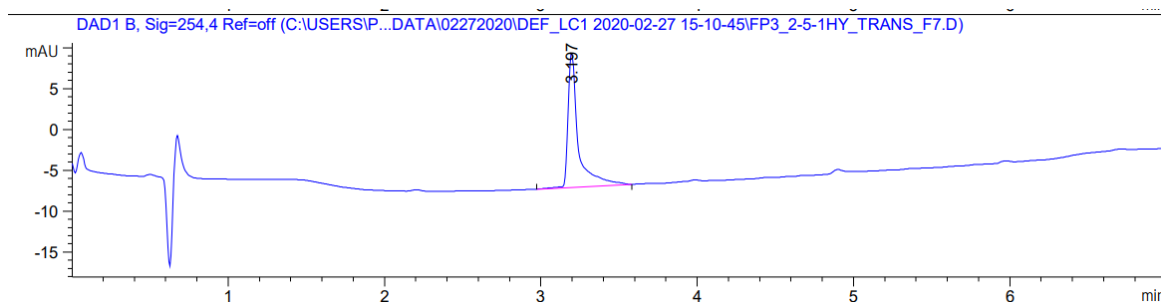

***N*-4-((2-(2-((6-chlorohexyl)oxy)ethoxy)ethyl)amino)-4-oxobutyl)-4-(5-((furan-2-ylmethyl)amino)-[1,2,4]triazolo[4,3-*c*]pyrimidin-8-yl)benzamide, UNC7706**

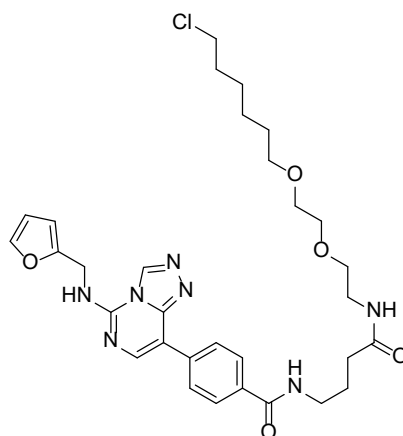

To a flask was added 4-(4-(5-((furan-2-ylmethyl)amino)-[1,2,4]triazolo[4,3-*c*]pyrimidin-8-yl)benzamido)butanoic acid (**23**) (5.6 mg, 13  $\mu$ mol, 1.0 equiv), DIPEA (6.0  $\mu$ L, 34  $\mu$ mol, 2.6 equiv), and TBTU (6.4 mg, 20  $\mu$ mol, 1.5 equiv) in DMF (0.2 mL), followed by addition of 2-(2-((6-chlorohexyl)oxy)ethoxy)ethan-1-amine 2,2,2-trifluoroacetate (6.0 mg, 18  $\mu$ mol, 1.3 equiv). The reaction was stirred at room temperature for 16 hr, concentrated *in vacuo* and purified by reverse phase high performance liquid chromatography (C18, 10-100% MeCN in H<sub>2</sub>O, 0.1% TFA) to yield the desired product as a white solid *N*-4-((2-(2-((6-chlorohexyl)oxy)ethoxy)ethyl)amino)-4-oxobutyl)-4-(5-((furan-2-ylmethyl)amino)-[1,2,4]triazolo[4,3-*c*]pyrimidin-8-yl)benzamide (2.3 mg, 27 %).

<sup>1</sup>H NMR (CD<sub>3</sub>OD-*d*<sub>4</sub>, 400 MHz):  $\delta$  9.33 (s, 1H), 8.09 (s, 1H), 8.04 (d, *J* = 8.47 Hz, 2H), 7.96 (d, *J* = 8.50 Hz, 2H), 7.49 – 7.46 (m, 1H), 6.46 – 6.37 (m, 2H), 4.85 (s, 2H), 3.61 – 3.55 (m, 4H), 3.55 – 3.53 (m, 2H), 3.51 (t, *J* = 5.78 Hz, 2H), 3.48 – 3.41 (m, 4H), 3.37 (t, *J* = 5.46 Hz, 2H), 2.32 (t, *J* = 7.39 Hz, 2H), 1.99 – 1.91 (m, 2H), 1.76 – 1.68 (m, 2H), 1.60 – 1.52 (m, 2H), 1.46 – 1.32 (m, 4H). <sup>13</sup>C NMR (CD<sub>3</sub>OD-*d*<sub>4</sub>, 101 MHz):  $\delta$  175.64, 169.67, 152.17, 145.32, 144.16, 143.74, 137.71, 134.86, 128.77, 128.74, 112.38, 111.53, 109.27, 72.23, 71.25, 71.18, 70.53, 45.67, 40.55, 40.42, 39.34, 34.50, 33.73, 30.50, 27.72, 26.76, 26.46, 2  $\times$  aromatic C not observed. LCMS: expected mass for [M+H]<sup>+</sup> (C<sub>31</sub>H<sub>41</sub>ClN<sub>7</sub>O<sub>5</sub>) requires 626.28 m/z, found 626.20 m/z.

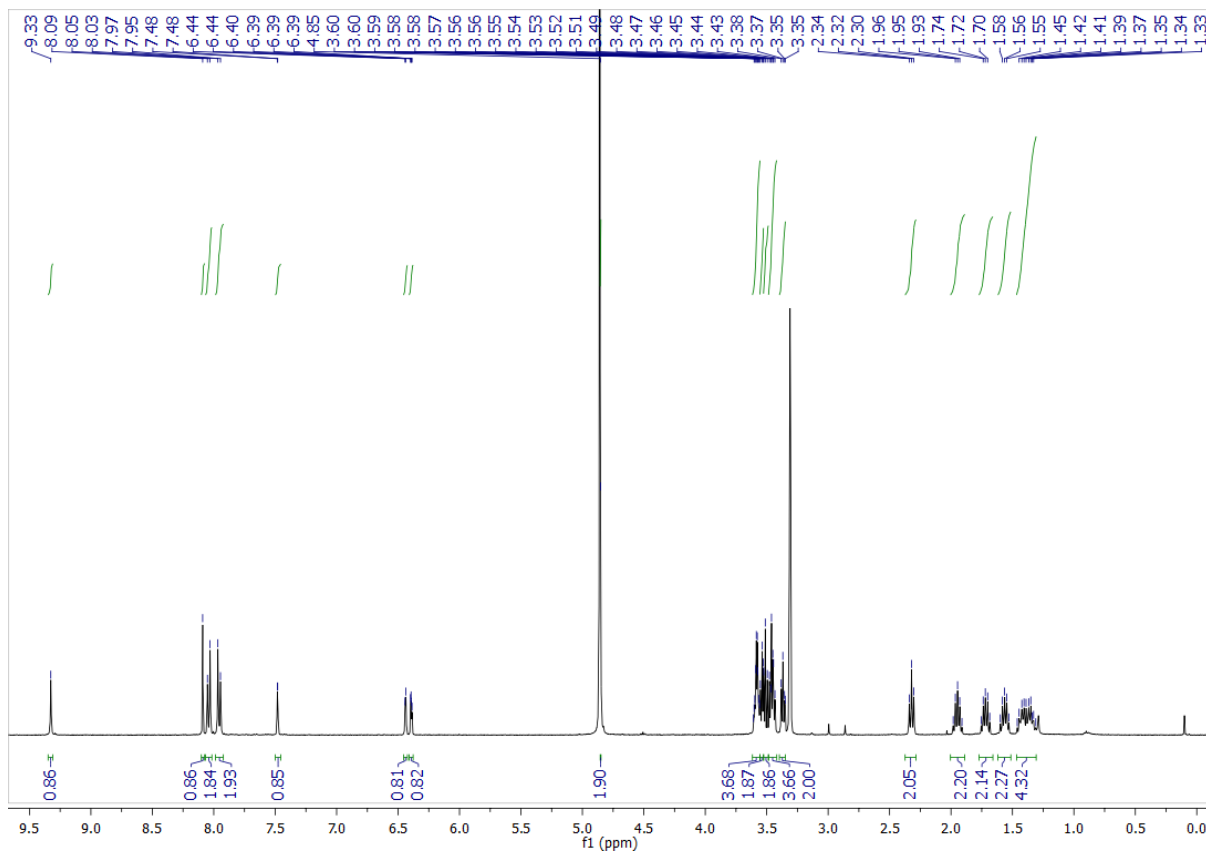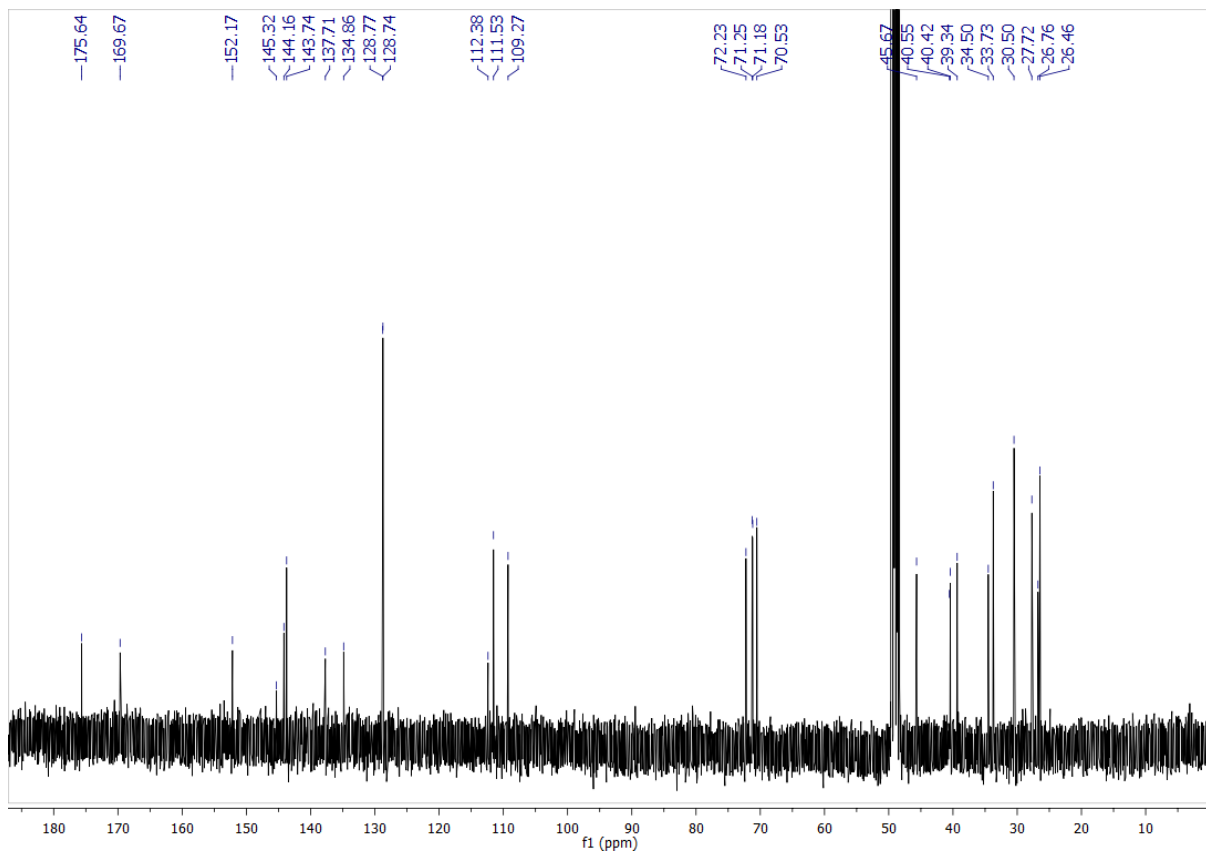



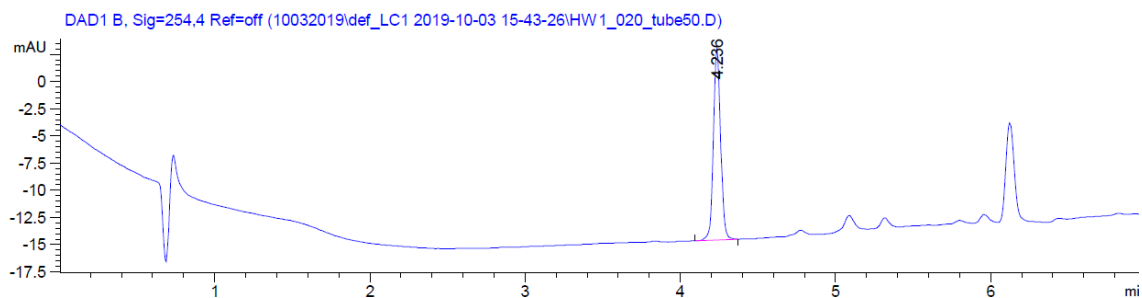

***N*-[2-(2-((6-chlorohexyl)oxy)ethoxy)ethyl]-1-(4-(5-((furan-2-ylmethyl)amino)-[1,2,4]triazolo[4,3-*c*]pyrimidin-8-yl)benzoyl)piperidine-4-carboxamide, UNC7791**

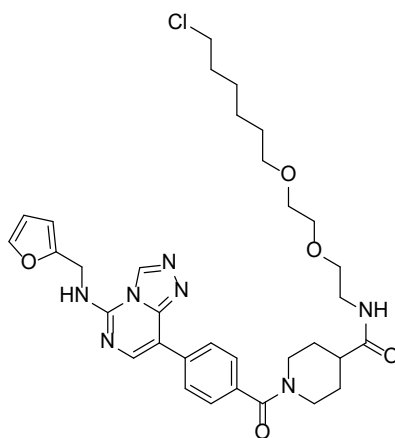

To a flask was added methyl 1-(4-(5-((furan-2-ylmethyl)amino)-[1,2,4]triazolo[4,3-*c*]pyrimidin-8-yl)benzoyl)piperidine-4-carboxylate (**22**) (15.3 mg, 33.2  $\mu\text{mol}$ , 1.0 equiv) and  $\text{LiOH}\cdot\text{H}_2\text{O}$  (4.2 mg, 99.7  $\mu\text{mol}$ , 3.0 equiv) in THF (133  $\mu\text{L}$ ) and  $\text{H}_2\text{O}$  (12  $\mu\text{L}$ ). The reaction was stirred at room temperature for 16 hr, concentrated *in vacuo* and purified by reverse phase column chromatography (10-100% MeCN in  $\text{H}_2\text{O}$  (+0.1% TFA)) to yield the desired product as a white solid 1-(4-(5-((furan-2-ylmethyl)amino)-[1,2,4]triazolo[4,3-*c*]pyrimidin-8-yl)benzoyl)piperidine-4-carboxylic acid (**24**) (6.7 mg, 45 %).

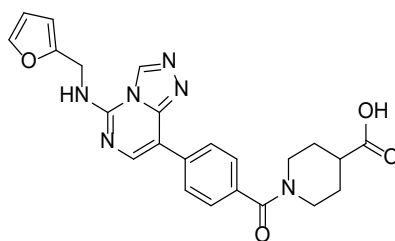

To a flask was added 1-(4-(5-((furan-2-ylmethyl)amino)-[1,2,4]triazolo[4,3-*c*]pyrimidin-8-yl)benzoyl)piperidine-4-carboxylic acid (**24**) (6.7 mg, 15  $\mu\text{mol}$ , 1.1 equiv), DIPEA (7.1  $\mu\text{L}$ , 41  $\mu\text{mol}$ , 3.0 equiv), and TBTU (5.7 mg, 18  $\mu\text{mol}$ , 1.3 equiv) in DMF (0.5 mL), followed by addition of 2-(2-((6-chlorohexyl)oxy)ethoxy)ethan-1-amine 2,2,2-trifluoroacetate (4.6 mg, 14  $\mu\text{mol}$ , 1.0 equiv). The reaction was stirred at room temperature for 16 hr, concentrated *in vacuo* and purified by reverse phase high performance liquid chromatography (C18, 10-100% MeCN in  $\text{H}_2\text{O}$ , 0.1% TFA) to yield the desired product as a white solid *N*-[2-(2-((6-chlorohexyl)oxy)ethoxy)ethyl]-1-(4-(5-((furan-2-ylmethyl)amino)-[1,2,4]triazolo[4,3-*c*]pyrimidin-8-yl)benzoyl)piperidine-4-carboxamide (3.5 mg, 39 %).

$^1\text{H}$  NMR ( $\text{CD}_3\text{OD}-d_4$ , 400 MHz):  $\delta$  9.32 (s, 1H), 8.07 (s, 1H), 8.01 (d,  $J = 8.41$  Hz, 2H), 7.55 (d,  $J = 8.39$  Hz, 2H), 7.50 – 7.47 (m, 1H), 6.46 – 6.38 (m, 2H), 4.84 (s, 2H), 4.72 – 4.62 (m, 1H), 3.93 – 3.81 (m, 1H), 3.62 – 3.57 (m, 4H), 3.56 – 3.51 (m, 4H), 3.48 (t,  $J = 6.57$  Hz, 2H), 3.37 (t,  $J = 5.43$  Hz, 2H), 3.25 – 3.14 (m, 1H), 3.01 – 2.90 (m, 1H), 2.54 (m, 1H), 1.97 – 1.87 (m, 1H), 1.82 – 1.68 (m, 5H), 1.63 – 1.54 (m, 2H), 1.50 – 1.33 (m, 4H).  $^{13}\text{C}$  NMR ( $\text{CD}_3\text{OD}-d_4$ , 101 MHz):  $\delta$  177.15, 172.10, 152.16, 150.28, 145.26, 144.29, 143.74, 136.42, 136.11, 129.06, 128.43, 112.36, 111.54, 109.28, 72.22, 71.25, 71.19, 70.52, 45.68, 43.89, 40.35, 39.35, 33.73, 30.53, 27.73, 26.47. LCMS: expected mass for  $[\text{M}+\text{H}]^+$  ( $\text{C}_{33}\text{H}_{43}\text{ClN}_7\text{O}_5$ ) requires 652.29 m/z, found 652.30 m/z.

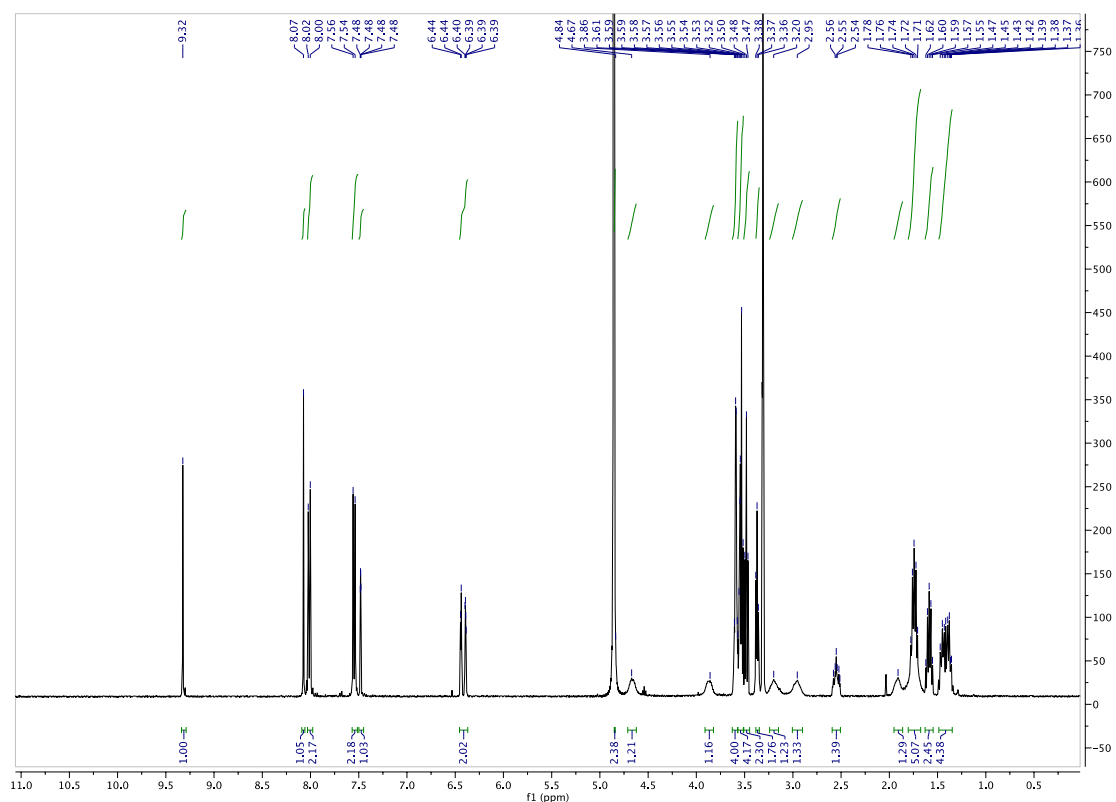

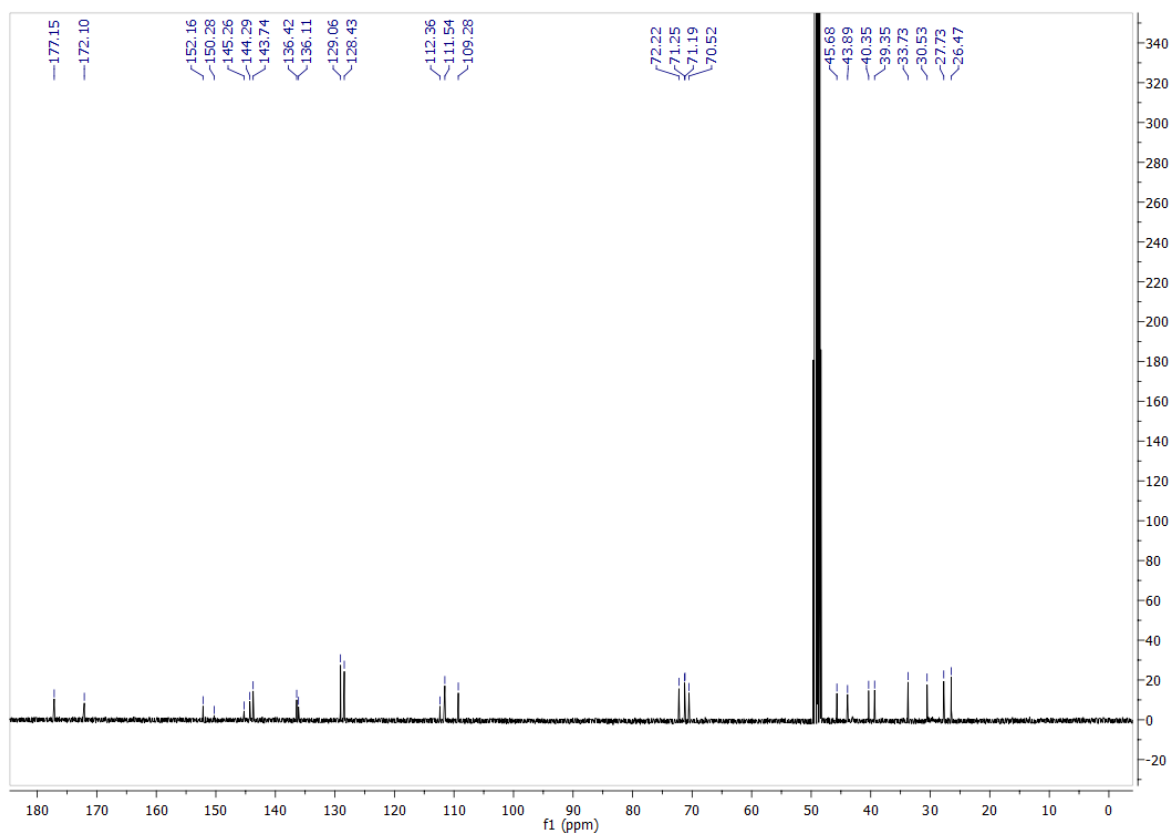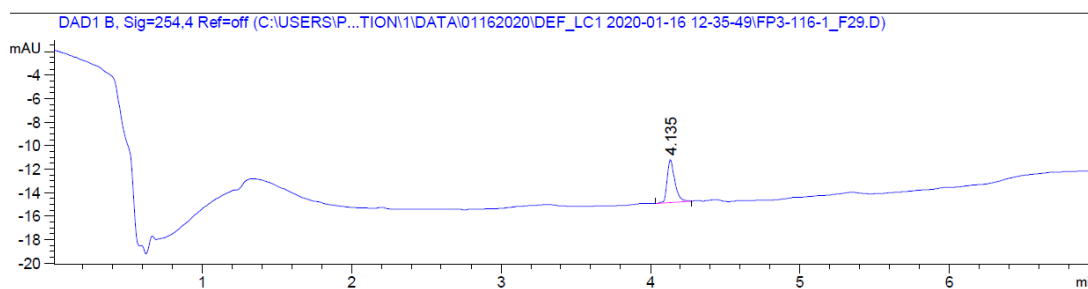

**(2*S*,4*S*)-1-((*S*)-2-((1*S*,3*R*)-3-(4-(5-((furan-2-ylmethyl)amino)-[1,2,4]triazolo[4,3-*c*]pyrimidin-8-yl)benzamido)cyclobutane-1-carboxamido)-3,3-dimethylbutanoyl)-4-hydroxy-*N*-(4-(4-methylthiazol-5-yl)benzyl)pyrrolidine-2-carboxamide, UNC7971**

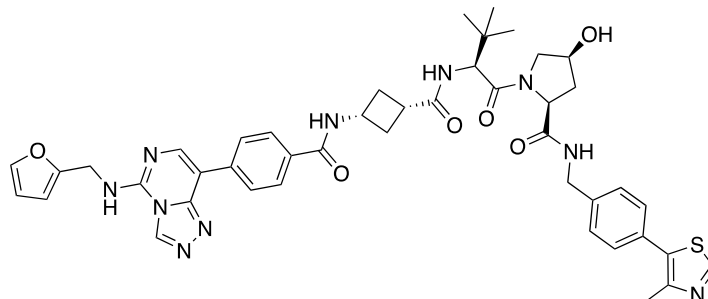

To a flask was added (1*S*,3*S*)-3-(4-(5-((furan-2-ylmethyl)amino)-[1,2,4]triazolo[4,3-*c*]pyrimidin-8-yl)benzamido)cyclobutane-1-carboxylic acid (**25**) (3.3 mg, 8  $\mu$ mol, 1.1 equiv), DIPEA (4  $\mu$ L, 22  $\mu$ mol, 3.2 equiv), and TBTU (3 mg, 22  $\mu$ mol, 1.3 equiv) in DMF (0.5 mL), followed by addition of (2*S*,4*S*)-1-((*S*)-2-amino-3,3-dimethylbutanoyl)-4-hydroxy-*N*-(4-(4-methylthiazol-5-yl)benzyl)pyrrolidine-2-carboxamide 2,2,2-trifluoroacetate (3.8 mg,

7  $\mu\text{mol}$ , 1.0 equiv). The reaction was stirred at room temperature for 16 hr, concentrated *in vacuo* and purified by reverse phase high performance liquid chromatography (C18, 10-100% MeCN in H<sub>2</sub>O, 0.1% TFA) to yield the desired product as a white solid (2*S*,4*S*)-1-((*S*)-2-((1*S*,3*R*)-3-(4-(5-((furan-2-ylmethyl)amino)-[1,2,4]triazolo[4,3-*c*]pyrimidin-8-yl)benzamido)cyclobutane-1-carboxamido)-3,3-dimethylbutanoyl)-4-hydroxy-*N*-(4-(4-methylthiazol-5-yl)benzyl)pyrrolidine-2-carboxamide (1.8 mg, 31 %).

<sup>1</sup>H NMR (CD<sub>3</sub>OD-*d*<sub>4</sub>, 400 MHz)  $\delta$  9.33 (s, 1H), 9.03 (s, 1H), 8.09 (s, 1H), 7.99 – 7.91 (m, 4H), 7.50 – 7.39 (m, 5H), 6.46 – 6.36 (m, 2H), 4.84 (s, 2H), 4.56 (d, *J* = 7.1 Hz, 2H), 4.54 – 4.49 (m, 1H), 4.46 (d, *J* = 8.1 Hz, 1H), 4.43 – 4.38 (m, 1H), 4.35 (s, 1H), 4.06 (dd, *J* = 10.6, 5.1 Hz, 1H), 3.72 (dd, *J* = 10.5, 3.7 Hz, 1H), 3.00 (q, *J* = 8.6 Hz, 1H), 2.66 – 2.58 (m, 1H), 2.57 – 2.50 (m, 1H), 2.48 (s, 3H), 2.43 (q, *J* = 6.2 Hz, 1H), 2.30 (ddt, *J* = 14.6, 9.8, 4.9 Hz, 2H), 1.99 (dt, *J* = 13.1, 4.4 Hz, 1H), 1.05 (s, 9H). <sup>13</sup>C NMR (CD<sub>3</sub>OD-*d*<sub>4</sub>, 101 MHz)  $\delta$  176.60, 174.89, 172.51, 168.84, 153.41, 152.02, 147.99, 145.30, 145.11, 143.78, 140.37, 137.44, 134.71, 134.00, 131.01, 130.38, 129.09, 128.92, 128.75, 111.94 (d, *J* = 1.2 Hz), 111.55, 109.37, 71.49, 61.00, 59.44, 57.60, 43.80, 42.55, 39.37, 37.90, 36.10, 34.63, 34.10, 33.55, 26.99, 15.38. LCMS: expected mass for [M+H]<sup>+</sup> (C<sub>44</sub>H<sub>49</sub>N<sub>10</sub>O<sub>6</sub>S) requires 845.35m/z, found 845.20 m/z.

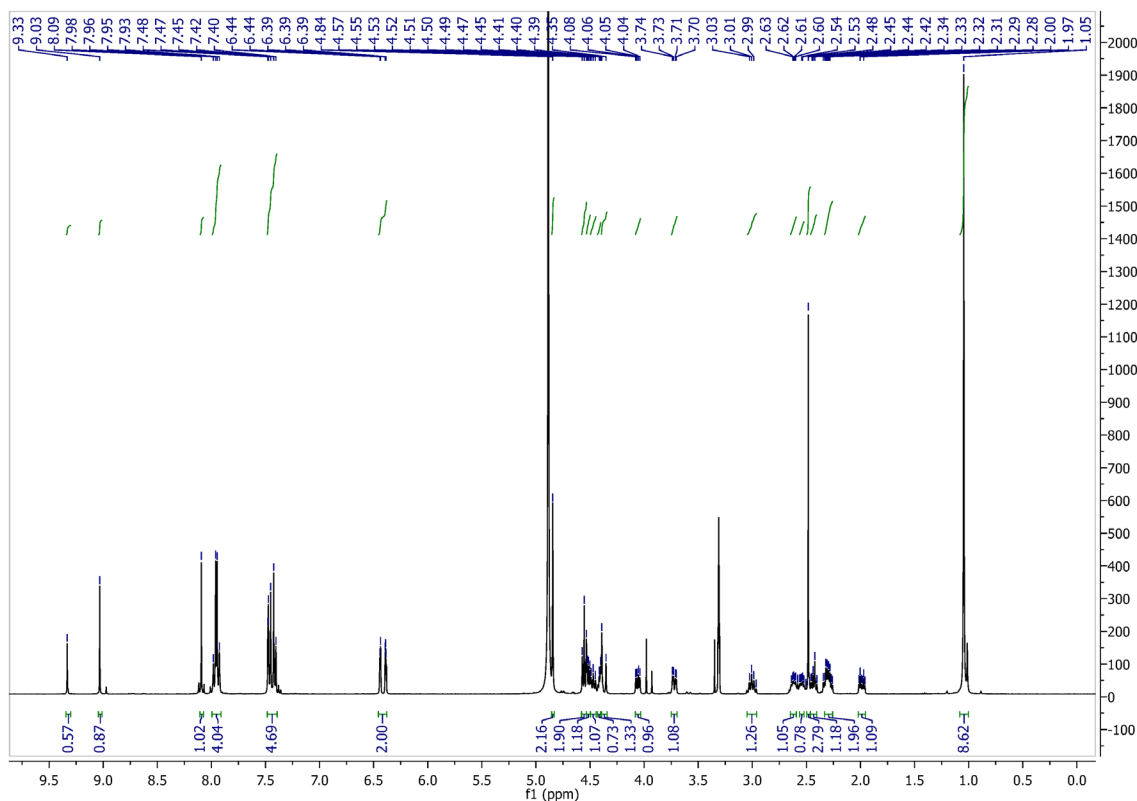

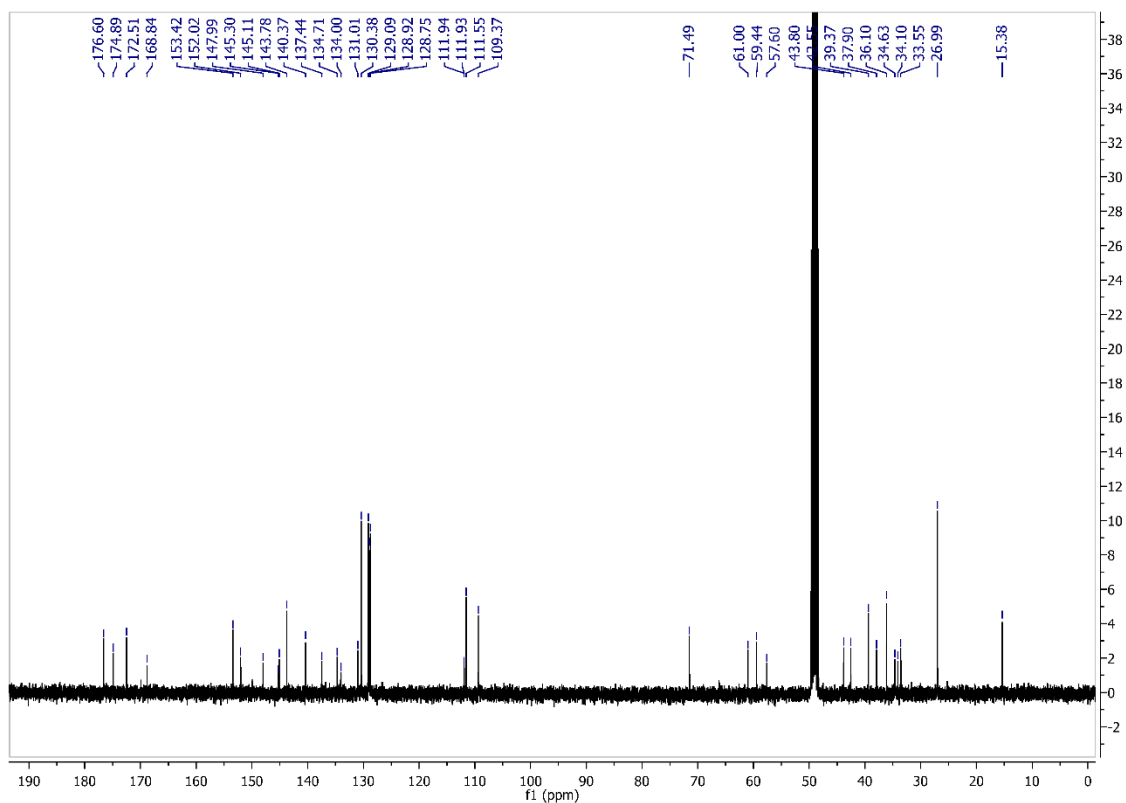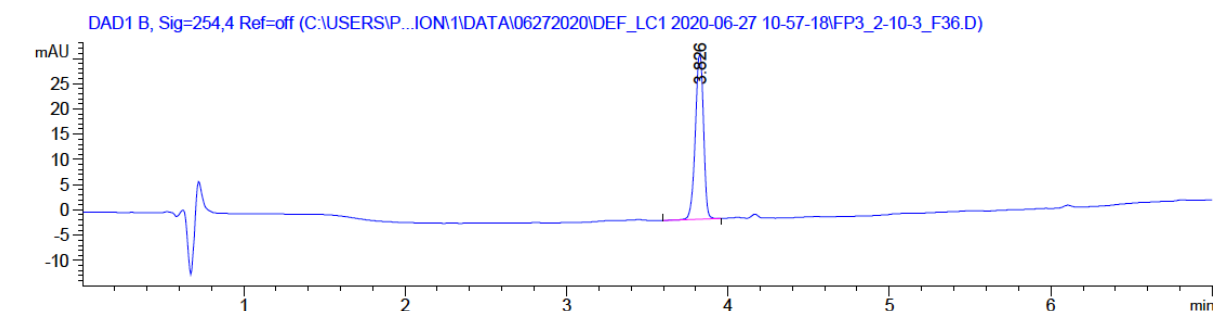

***Tert*-butyl ((*S*)-1-((2*S*,4*R*)-2-((2-(2-((6-chlorohexyl)oxy)ethoxy)ethoxy)-4-(4-methylthiazol-5-yl)benzyl)carbamoyl)-4-hydroxypyrrolidin-1-yl)-3,3-dimethyl-1-oxobutan-2-yl)carbamate, 27**

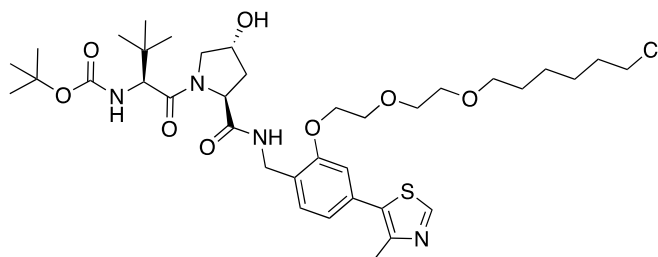

To a vial was added *tert*-butyl ((*S*)-1-((2*S*,4*R*)-4-hydroxy-2-((2-hydroxy-4-(4-methylthiazol-5-yl)benzyl)carbamoyl)pyrrolidin-1-yl)-3,3-dimethyl-1-oxobutan-2-yl)carbamate (41 mg, 0.13 mmol, 1.2 equiv), Cs<sub>2</sub>CO<sub>3</sub> (41 mg, 0.13 mmol, 1.2 equiv), followed by 2-(2-((6-chlorohexyl)oxy)ethoxy)ethyl 4-methylbenzenesulfonate (41 mg, 0.11 mmol, 1.0 equiv) in DMF (1 mL) and the reaction stirred at room

temperature for 16 hr. The reaction was quenched with H<sub>2</sub>O and extracted with EtOAc (x3). Organics were combined, washed with washed (x3) and brine, dried with a phase separator and concentrated *in vacuo* to yield a yellow residue. Crude material was purified by column chromatography (silica, 0-10% MeOH in CH<sub>2</sub>Cl<sub>2</sub>) to yield the desired product as a clear oil *tert*-butyl ((*S*)-1-((2*S*,4*R*)-2-((2-(2-(2-(6-chlorohexyl)oxy)ethoxy)ethoxy)-4-(4-methylthiazol-5-yl)benzyl)carbamoyl)-4-hydroxypyrrolidin-1-yl)-3,3-dimethyl-1-oxobutan-2-yl)carbamate (**27**) (46.2 mg, 73%).

<sup>1</sup>H NMR (CDCl<sub>3</sub>, 400 MHz) δ 8.66 (s, 1H), 7.37 (t, *J* = 6.0 Hz, 1H), 7.31 (d, *J* = 7.7 Hz, 1H), 6.94 (dd, *J* = 7.7, 1.6 Hz, 1H), 6.87 (d, *J* = 1.6 Hz, 1H), 5.21 (d, *J* = 9.2 Hz, 1H), 4.69 (t, *J* = 7.8 Hz, 1H), 4.54 – 4.44 (m, 1H), 4.40 (mz, 2H), 4.23 – 4.11 (m, 3H), 3.99 (d, *J* = 11.3 Hz, 1H), 3.90 (dt, *J* = 5.8, 4.3 Hz, 2H), 3.78 – 3.66 (m, 2H), 3.63 – 3.54 (m, 3H), 3.50 (t, *J* = 6.7 Hz, 2H), 3.45 (t, *J* = 6.7 Hz, 2H), 3.25 (s, 1H), 2.50 (s, 3H), 2.48 – 2.39 (m, 1H), 2.13 – 2.03 (m, 2H), 1.79 – 1.70 (m, 2H), 1.58 (p, *J* = 6.8 Hz, 2H) 1.52 – 1.28 (m, 14H), 0.88 (s, 9H). <sup>13</sup>C NMR (CDCl<sub>3</sub>, 101 MHz) δ 172.18, 170.74, 156.79, 156.42, 150.41, 148.56, 132.28, 131.87, 129.68, 126.88, 122.04, 112.78, 80.30, 71.39, 70.97, 70.25, 70.23, 69.77, 68.04, 58.84, 58.39, 56.52, 45.15, 38.95, 36.11, 35.03, 32.62, 29.52, 28.43, 26.78, 26.38, 25.51, 16.23. LCMS: expected mass for [M+H]<sup>+</sup> (C<sub>37</sub>H<sub>58</sub>ClN<sub>4</sub>O<sub>8</sub>S) requires 753.36 m/z, found 753.30 m/z.

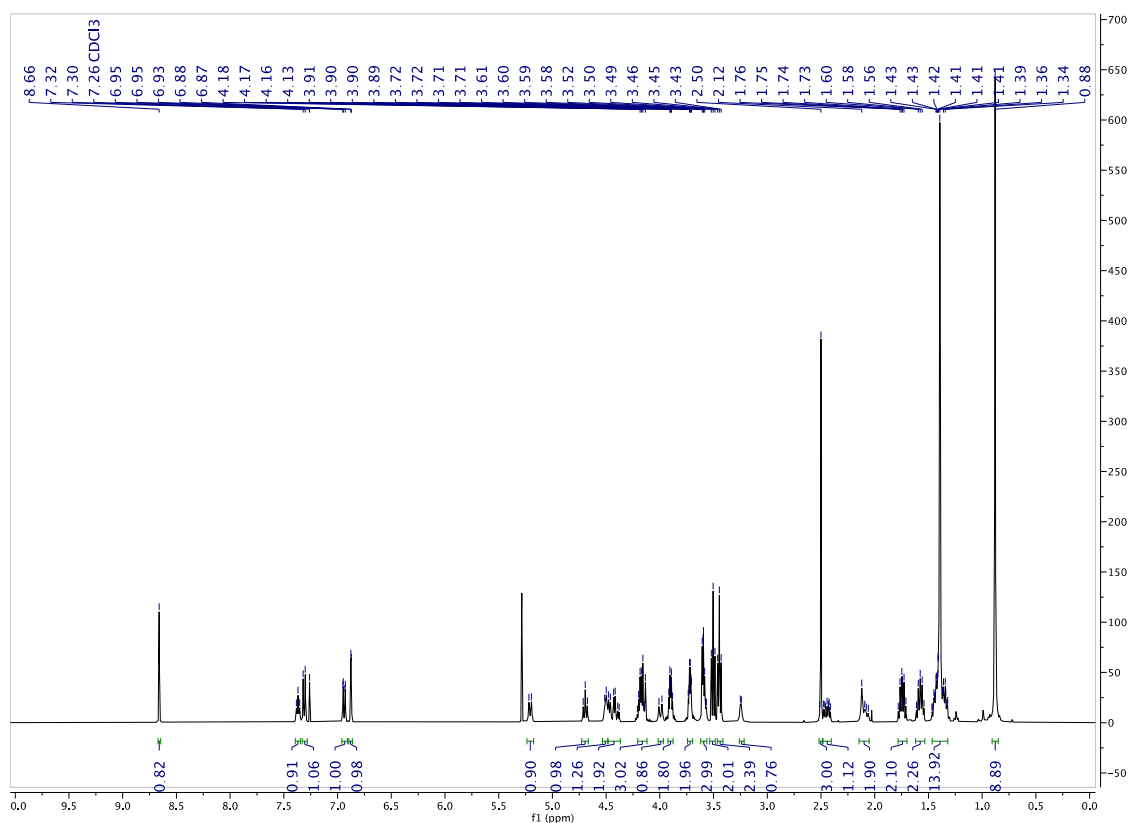

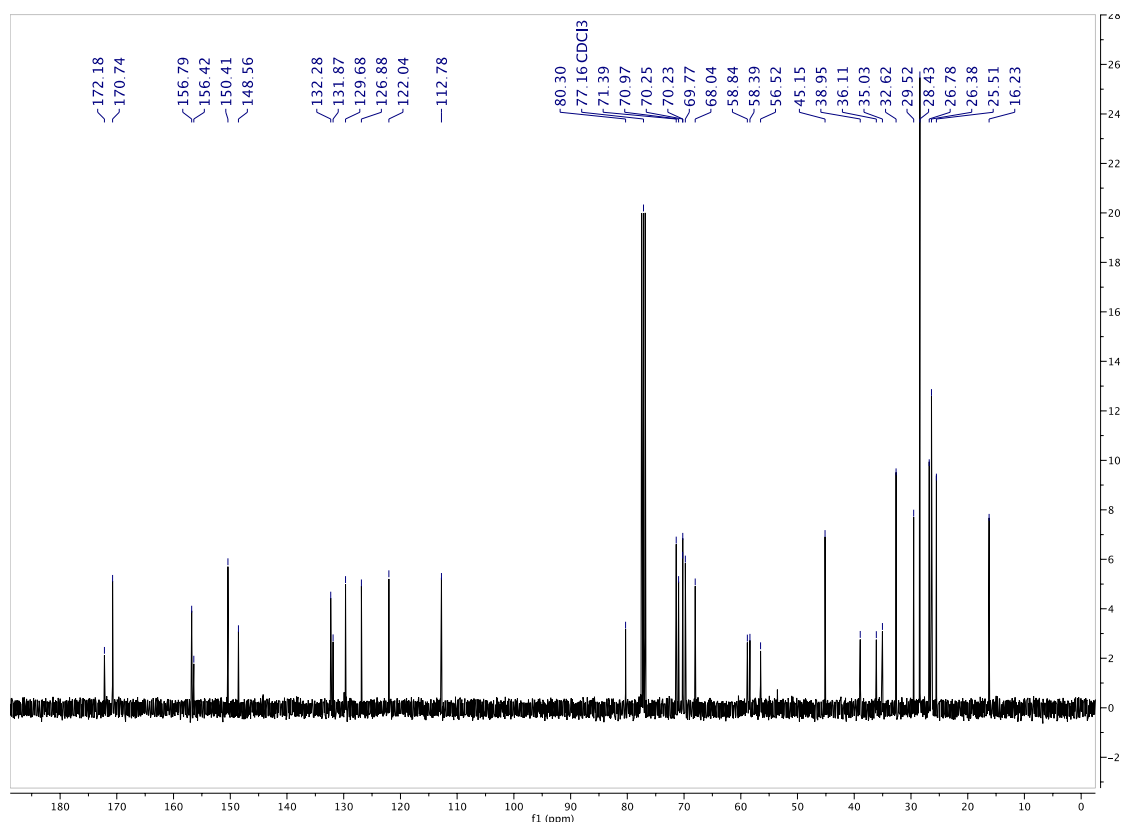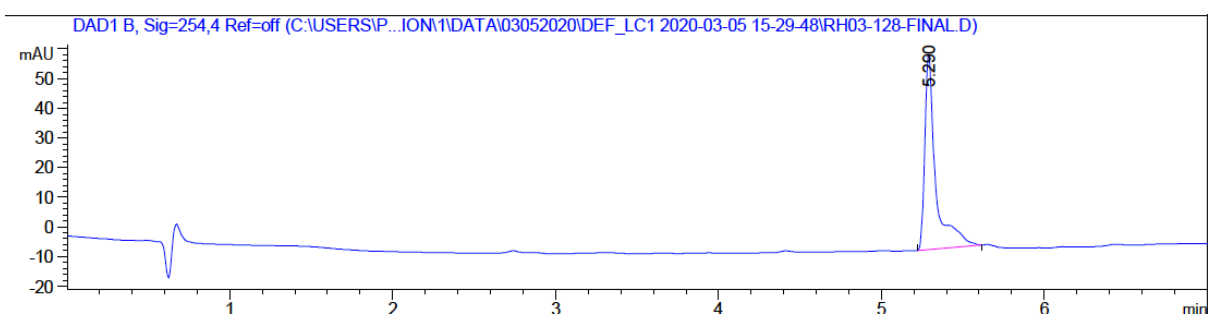

**(2S,4R)-1-((S)-2-amino-3,3-dimethylbutanoyl)-N-(2-(2-(2-((6-chlorohexyl)oxy)ethoxy)ethoxy)-4-(4-methylthiazol-5-yl)benzyl)-4-hydroxypyrrolidine-2-carboxamide 2,2,2-trifluoroacetate, 28**

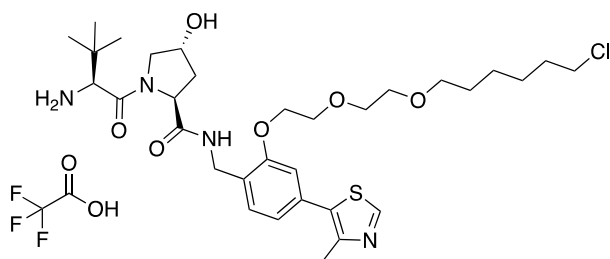

To a vial was added *tert*-butyl ((S)-1-((2S,4R)-2-((2-(2-(2-((6-chlorohexyl)oxy)ethoxy)ethoxy)-4-(4-methylthiazol-5-yl)benzyl)carbamoyl)-4-hydroxypyrrolidin-1-yl)-3,3-dimethyl-1-oxobutan-2-yl)carbamate (**27**) (45 mg, 61  $\mu$ mol, 1.0 equiv) and 20% TFA in  $\text{CH}_2\text{Cl}_2$  and the reaction stirred at room temperature. The reaction was concentrated *in vacuo* and purified by column chromatography (C18,

10-100% MeOH in H<sub>2</sub>O + 0.1% TFA) to yield the desired product as a white solid (2*S*,4*R*)-1-((*S*)-2-amino-3,3-dimethylbutanoyl)-*N*-(2-(2-(2-((6-chlorohexyl)oxy)ethoxy)ethoxy)-4-(4-methylthiazol-5-yl)benzyl)-4-hydroxypyrrolidine-2-carboxamide 2,2,2-trifluoroacetate (**28**) (45 mg, 96%).

<sup>1</sup>H NMR (CD<sub>3</sub>OD-*d*<sub>4</sub>, 400 MHz) δ 9.09 (s, 1H), 7.50 (d, *J* = 7.8 Hz, 1H), 7.07 (d, *J* = 1.7 Hz, 1H), 7.01 (dd, *J* = 7.8, 1.7 Hz, 1H), 4.69 (m, 1H), 4.53 (m, 1H), 4.54 – 4.36 (m, 2H), 4.28 – 4.21 (m, 2H), 4.04 (s, 1H), 3.95 – 3.88 (m, 2H), 3.81 (m, 1H), 3.77 – 3.66 (m, 3H), 3.65 – 3.58 (m, 2H), 3.52 (t, *J* = 6.6 Hz, 2H), 3.48 (t, *J* = 6.5 Hz, 2H), 2.51 (s, 3H), 2.35 – 2.24 (m, 1H), 2.09 (m, 1H), 1.79 – 1.66 (m, 2H), 1.56 (p, *J* = 6.7 Hz, 2H), 1.48 – 1.32 (m, 4H), 1.11 (s, 9H). <sup>13</sup>C NMR (CD<sub>3</sub>OD-*d*<sub>4</sub>, 400 MHz) δ 173.98, 168.54, 158.12, 153.57, 147.83, 134.30, 132.16, 130.02, 128.75, 122.75, 113.72, 72.18, 71.80, 71.19, 71.14, 70.83, 69.40, 60.92, 60.33, 58.02, 45.70, 39.47, 39.05, 35.75, 33.72, 30.54, 27.71, 26.65, 26.49, 15.39. LCMS: expected mass for [M+H]<sup>+</sup> (C<sub>32</sub>H<sub>50</sub>ClN<sub>4</sub>O<sub>6</sub>S) requires 653.31 m/z, found 653.30 m/z.

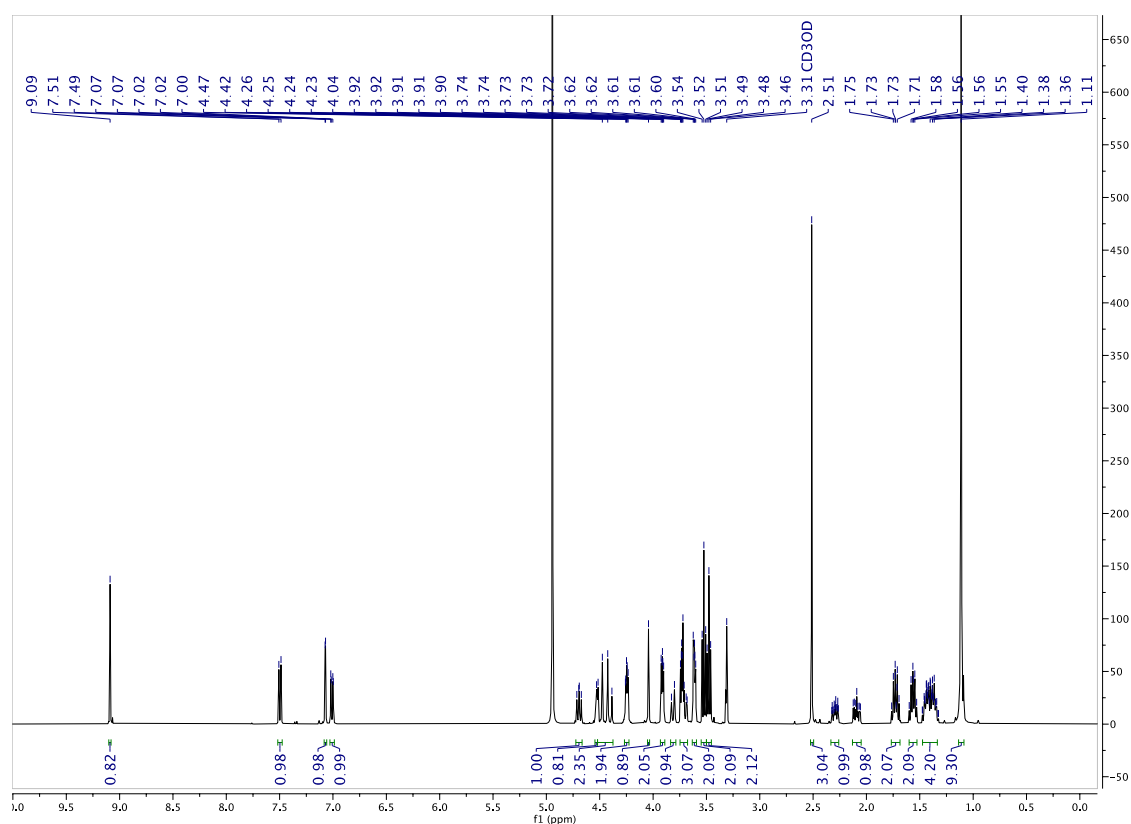



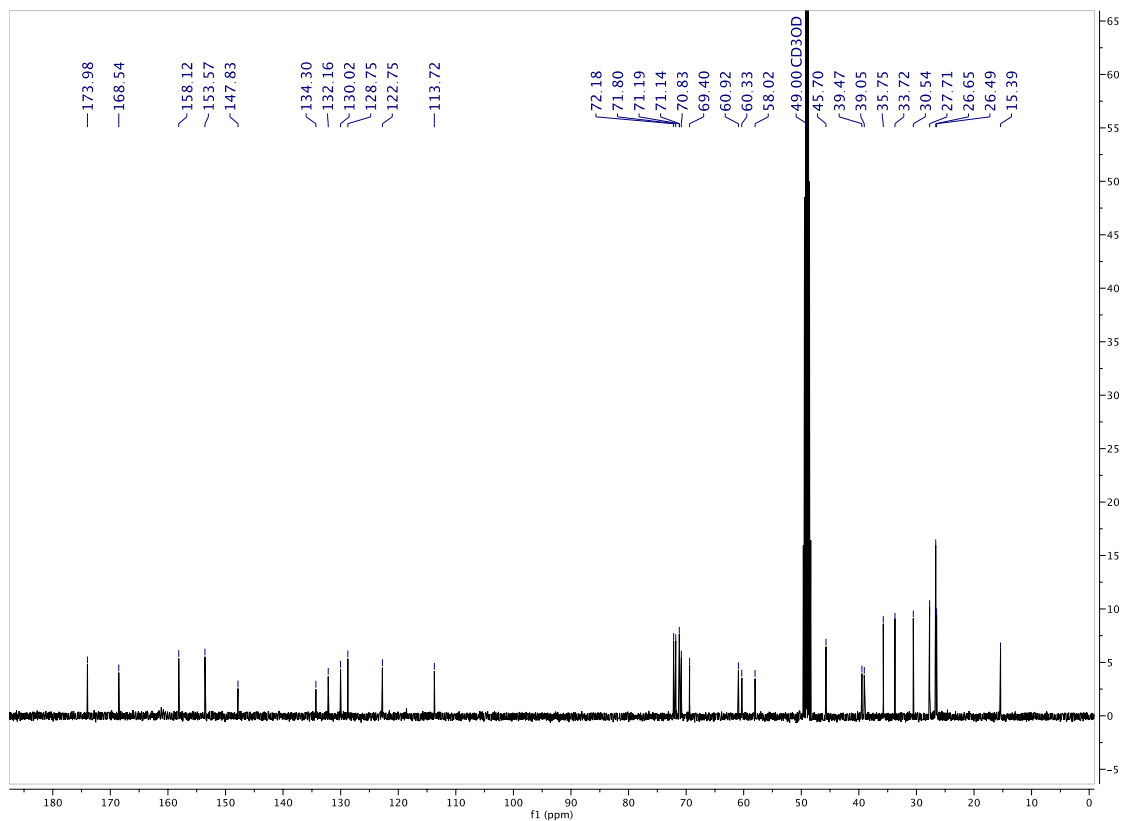

DAD1 B, Sig=254,4 Ref=off (C:\USERS\IP...ION\1\DATA\03062020\DEF\_LC1 2020-03-06 13-14-13\RH03-129-FINAL.D)

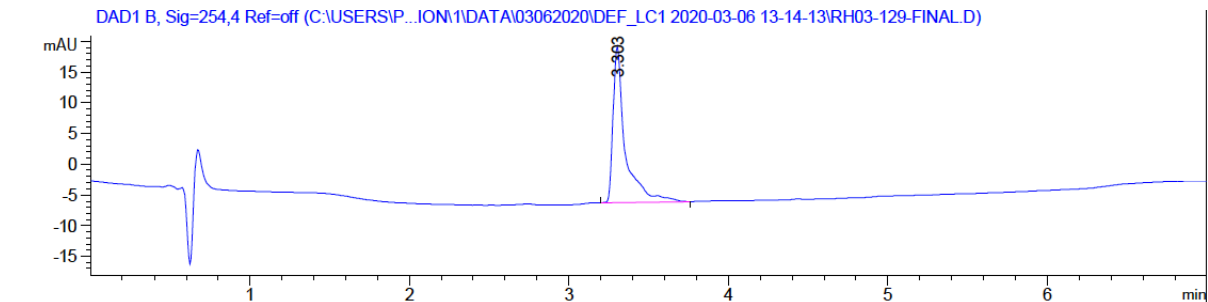

**(2R,4S)-N-(2-(2-(2-((6-chlorohexyl)oxy)ethoxy)ethoxy)-4-(4-methylthiazol-5-yl)benzyl)-1-((S)-2-(4-(4-(5-((furan-2-ylmethyl)amino)-[1,2,4]triazolo[4,3-c]pyrimidin-8-yl)benzamido)butanamido)-3,3-dimethylbutanoyl)-4-hydroxypyrrolidine-2-carboxamide, UNC7962**

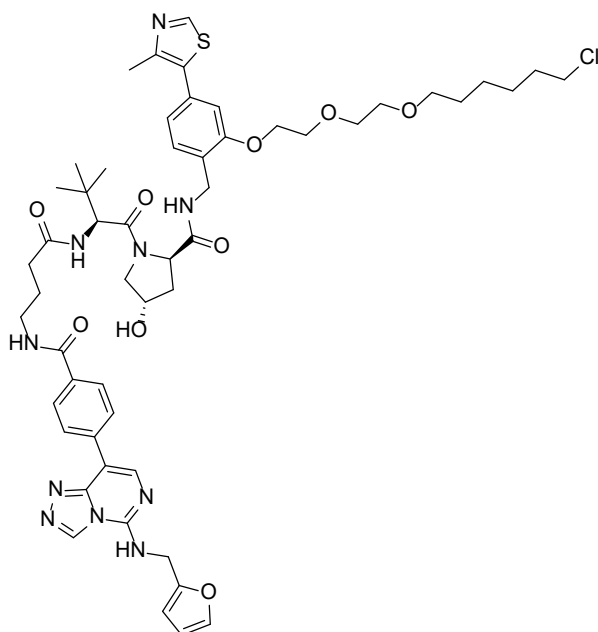

To a flask was added 4-(4-(5-((furan-2-ylmethyl)amino)-[1,2,4]triazolo[4,3-c]pyrimidin-8-yl)benzamido)butanoic acid (**23**) (3.0 mg, 7  $\mu$ mol, 1.1 equiv), DIPEA (4  $\mu$ L, 20  $\mu$ mol, 3.2 equiv), and TBTU (3.0 mg, 8  $\mu$ mol, 1.3 equiv) in DMF (70  $\mu$ L), followed by addition of (2S,4R)-1-((S)-2-amino-3,3-dimethylbutanoyl)-N-(2-(2-(2-((6-chlorohexyl)oxy)ethoxy)ethoxy)-4-(4-methylthiazol-5-yl)benzyl)-4-hydroxypyrrolidine-2-carboxamide 2,2,2-trifluoroacetate (**28**) (5.0 mg, 7  $\mu$ mol, 1.0 equiv). The reaction was stirred at room temperature for 16 hr, concentrated *in vacuo* and purified by preparative high-performance liquid chromatography (10-100% MeCN in H<sub>2</sub>O (+ 0.1% TFA)). The product was concentrated to yield the desired product as a white solid (2R,4S)-N-(2-(2-(2-((6-chlorohexyl)oxy)ethoxy)ethoxy)-4-(4-methylthiazol-5-yl)benzyl)-1-((S)-2-(4-(4-(5-((furan-2-ylmethyl)amino)-[1,2,4]triazolo[4,3-c]pyrimidin-8-yl)benzamido)butanamido)-3,3-dimethylbutanoyl)-4-hydroxypyrrolidine-2-carboxamide (3.8 mg, 54%).

<sup>1</sup>H NMR (CD<sub>3</sub>OD-*d*<sub>4</sub>, 400 MHz):  $\delta$  9.33 (s, 1H), 8.97 (s, 1H), 8.08 (s, 1H), 7.98 (m, 4H), 7.51 – 7.47 (m, 2H), 7.04 (s, 1H), 6.98 (d, *J* = 1.51, 7.75 Hz, 1H), 6.46 – 6.38 (m, 2H), 4.64 – 4.58 (m, 2H), 4.53 – 4.46 (m, 2H), 4.39 (m, 1H), 4.25 – 4.20 (m, 2H), 3.94 – 3.88 (m, 3H), 3.80 (m, 1H), 3.74 – 3.70 (m, 2H), 3.62 – 3.57 (m, 2H), 3.53 – 3.40 (m, 6H), 2.48 (s, 3H), 2.40 (t, *J* = 7.43 Hz, 2H), 2.25 – 2.18 (m, 1H), 2.09 (m, 1H), 1.95 (m, 2H), 1.75 – 1.67 (m, 2H), 1.59 – 1.50 (m, 2H), 1.45 – 1.31 (m, 4H), 1.03 (s, 9H). 2  $\times$  <sup>1</sup>H not observed. <sup>13</sup>C NMR (CD<sub>3</sub>OD-*d*<sub>4</sub>, 101 MHz):  $\delta$  175.41, 174.41, 172.36, 169.68, 158.04, 153.18, 152.13, 148.36, 145.29, 144.51, 143.77, 142.06, 137.55, 134.92, 132.40, 130.08, 128.84, 128.77, 128.63, 122.79, 113.67, 112.24, 111.55, 109.32, 72.19, 71.84, 71.22, 71.12, 70.86, 69.40, 60.79, 59.29, 57.97, 54.66, 45.70, 40.47, 39.36, 38.89, 36.46, 33.99, 33.73, 30.55, 27.72, 27.08, 26.71, 26.50, 15.64. 2  $\times$  <sup>13</sup>C not observed. LCMS: expected mass for [M+H]<sup>+</sup> (C<sub>53</sub>H<sub>68</sub>ClN<sub>10</sub>O<sub>9</sub>S) requires 1055.45 m/z, found 1055.30 m/z.

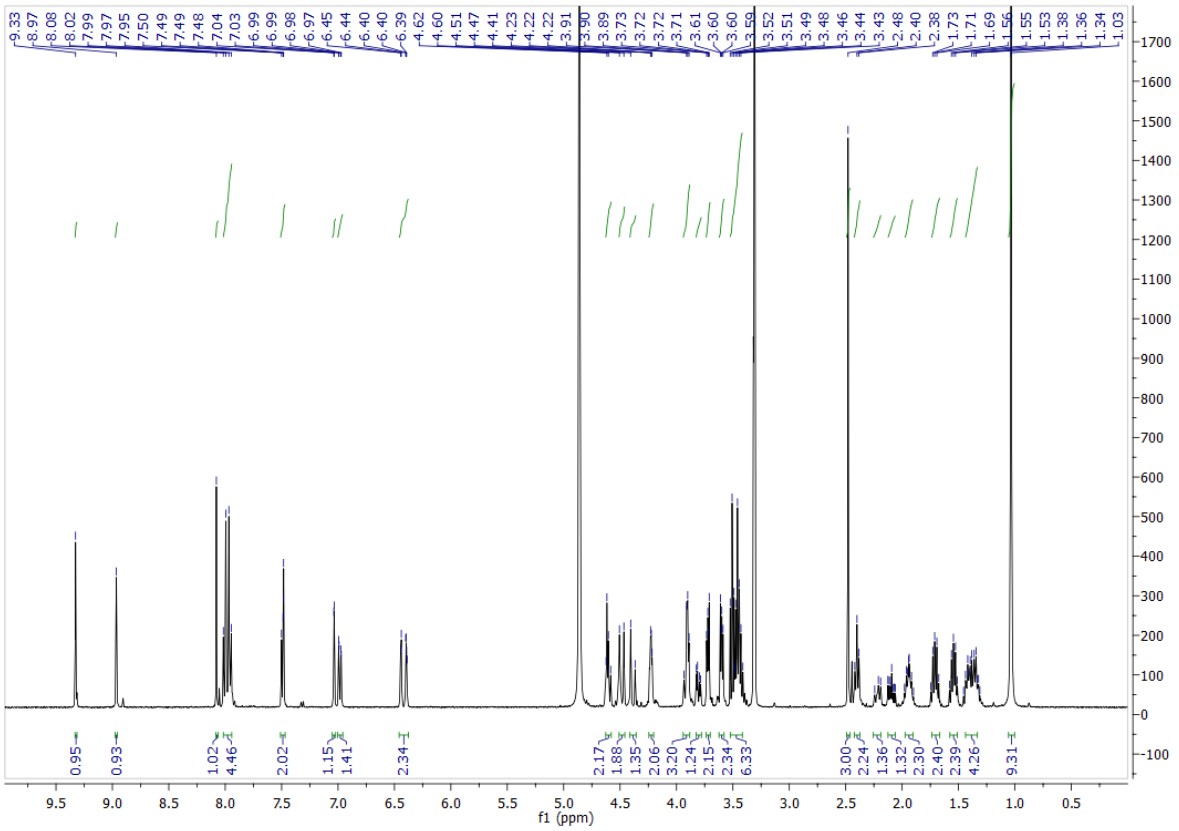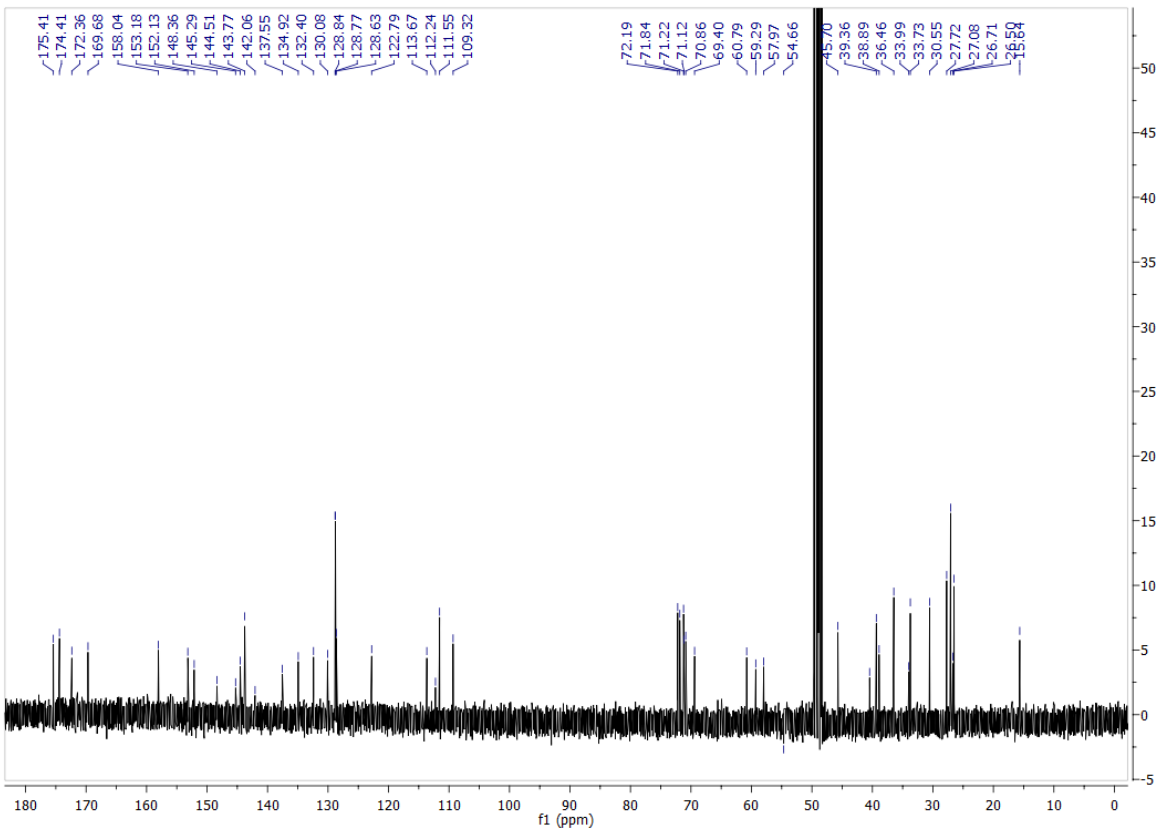

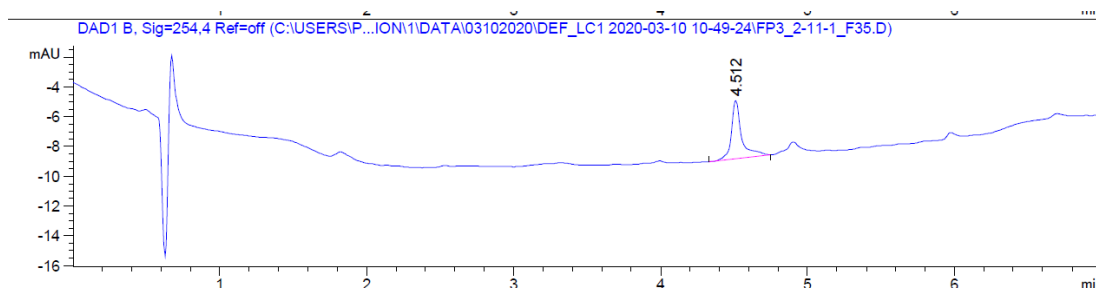

**(2*S*,4*R*)-*N*-(2-(2-(2-((6-chlorohexyl)oxy)ethoxy)ethoxy)-4-(4-methylthiazol-5-yl)benzyl)-1-((*S*)-2-((1*S*,3*R*)-3-(4-(5-((furan-2-ylmethyl)amino)-[1,2,4]triazolo[4,3-*c*]pyrimidin-8-yl)benzamido)cyclobutane-1-carboxamido)-3,3-dimethylbutanoyl)-4-hydroxypyrrolidine-2-carboxamide, UNC7960**

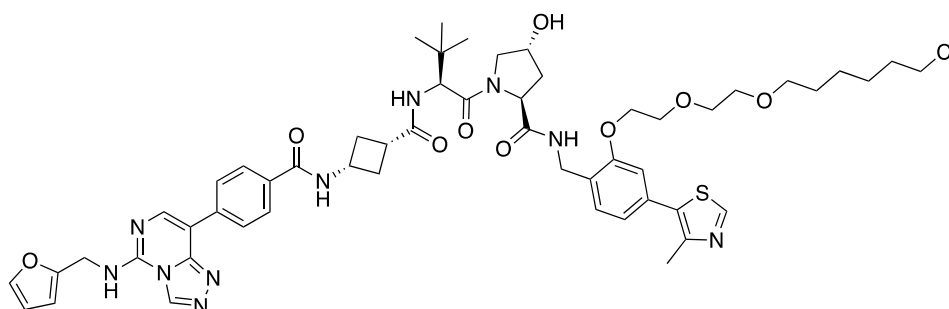

To a flask was added (1*S*,3*S*)-3-(4-(5-((furan-2-ylmethyl)amino)-[1,2,4]triazolo[4,3-*c*]pyrimidin-8-yl)benzamido)cyclobutane-1-carboxylic acid (**25**) (2.3 mg, 5.3  $\mu$ mol, 1.1 equiv), DIPEA (2.7  $\mu$ L, 15  $\mu$ mol, 3.2 equiv), and TBTU (2.0 mg, 6.3  $\mu$ mol, 1.3 equiv) in DMF (100  $\mu$ L), followed by addition of (2*S*,4*R*)-1-((*S*)-2-amino-3,3-dimethylbutanoyl)-*N*-(2-(2-(2-((6-chlorohexyl)oxy)ethoxy)ethoxy)-4-(4-methylthiazol-5-yl)benzyl)-4-hydroxypyrrolidine-2-carboxamide 2,2,2-trifluoroacetate (**28**) (3.7 mg, 4.8  $\mu$ mol, 1.0 equiv). The reaction was stirred at room temperature for 16 hr, concentrated *in vacuo* and purified by preparative high-performance liquid chromatography (10-100% MeCN in H<sub>2</sub>O (+ 0.1% TFA)). The product was concentrated to yield the desired product as a white solid (2*S*,4*R*)-*N*-(2-(2-(2-((6-chlorohexyl)oxy)ethoxy)ethoxy)-4-(4-methylthiazol-5-yl)benzyl)-1-((*S*)-2-((1*S*,3*R*)-3-(4-(5-((furan-2-ylmethyl)amino)-[1,2,4]triazolo[4,3-*c*]pyrimidin-8-yl)benzamido)cyclobutane-1-carboxamido)-3,3-dimethylbutanoyl)-4-hydroxypyrrolidine-2-carboxamide (1.4 mg, 28%).

<sup>1</sup>H NMR (CD<sub>3</sub>OD-*d*<sub>4</sub>, 400 MHz)  $\delta$  9.32 (s, 1H), 8.92 (s, 1H), 8.10 – 8.00 (m, 4H), 7.95 (d, *J* = 8.5 Hz, 3H), 7.80 (d, *J* = 8.8 Hz, 1H), 7.49 (m, 2H), 7.05 (m, 1H), 7.01 (m, 1H), 6.45 – 6.37 (m, 2H), 4.65 (m, 1H), 4.60 (t, *J* = 8.1 Hz, 2H), 4.53 – 4.45 (m, 3H), 4.44 – 4.38 (m, 2H), 4.27 – 4.21 (m, 2H), 3.95 – 3.88 (m, 2H), 3.81 (dd, *J* = 10.9, 3.9 Hz, 1H), 3.77 – 3.70 (m, 2H), 3.64 – 3.58 (m, 2H), 3.52 (t, *J* = 6.7 Hz, 2H), 3.47 (t, *J* = 6.5 Hz, 2H), 3.00 (t, *J* = 8.6 Hz, 1H), 2.66 – 2.54 (m, 4H), 2.50 (s, 3H), 2.34 – 2.28 (m, 2H), 2.20 (m, 1H), 2.15 – 2.01 (m, 1H), 1.72 (p, *J* = 6.8 Hz, 2H), 1.56 (p, *J* = 6.8 Hz, 2H), 1.47 – 1.33 (m, 6H), 1.03 (s, 9H). LCMS: expected mass for [M+H]<sup>+</sup> (C<sub>54</sub>H<sub>68</sub>ClN<sub>10</sub>O<sub>9</sub>S) requires 1067.45 m/z, [M+H]<sup>+</sup>/2 requires 533.73 found m/z 533.75.

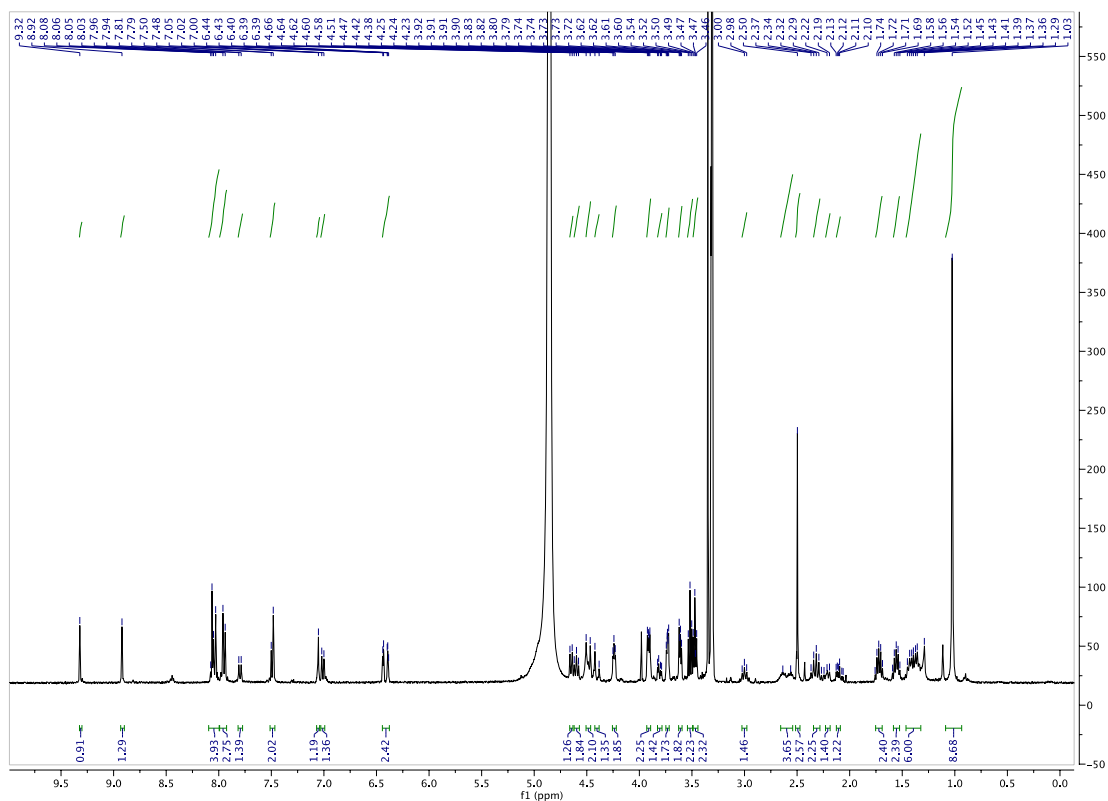

OAD1 B, Sig=254,4 Ref=off (2U2U0629ZU2U06f LC1 2U2U-06-29 12-48-U4FP3\_2-8-2.D)

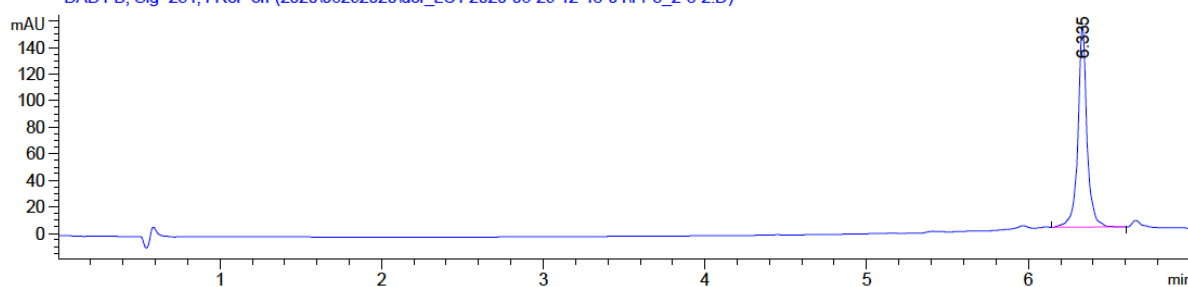

**(2*S*,4*R*)-*N*-(2-(2-(2-((6-chlorohexyl)oxy)ethoxy)ethoxy)-4-(4-methylthiazol-5-yl)benzyl)-1-(((*S*)-2-((1*R*,3*S*)-3-(4-(5-((furan-2-ylmethyl)amino)-[1,2,4]triazolo[4,3-*c*]pyrimidin-8-yl)benzamido)cyclobutane-1-carboxamido)-3,3-dimethylbutanoyl)-4-hydroxypyrrolidine-2-carboxamide, UNC7961**

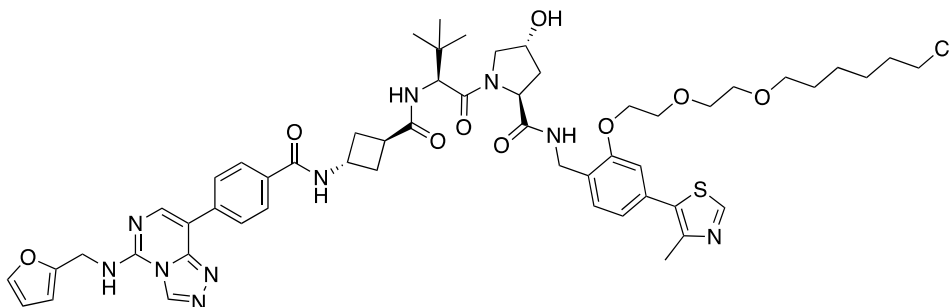

To a flask was added (1*R*,3*R*)-3-(4-(5-((furan-2-ylmethyl)amino)-[1,2,4]triazolo[4,3-*c*]pyrimidin-8-yl)benzamido)cyclobutane-1-carboxylic acid (**26**) (3.0 mg, 7  $\mu$ mol, 1.1 equiv), DIPEA (4  $\mu$ L, 20  $\mu$ mol, 3.2 equiv), and TBTU (3.0 mg, 8  $\mu$ mol, 1.3 equiv) in DMF (100  $\mu$ L), followed by addition of (2*S*,4*R*)-1-((*S*)-

2-amino-3,3-dimethylbutanoyl)-*N*-(2-(2-(2-((6-chlorohexyl)oxy)ethoxy)ethoxy)-4-(4-methylthiazol-5-yl)benzyl)-4-hydroxypyrrolidine-2-carboxamide 2,2,2-trifluoroacetate (**28**) (5.0 mg, 7  $\mu$ mol, 1.0 equiv). The reaction was stirred at room temperature for 16 hr, concentrated *in vacuo* and purified by preparative high-performance liquid chromatography (10-100% MeCN in H<sub>2</sub>O (+ 0.1% TFA)). The product was concentrated to yield the desired product as a white solid (2*S*,4*R*)-*N*-(2-(2-(2-((6-chlorohexyl)oxy)ethoxy)ethoxy)-4-(4-methylthiazol-5-yl)benzyl)-1-((*S*)-2-((1*R*,3*S*)-3-(4-(5-((furan-2-ylmethyl)amino)-[1,2,4]triazolo[4,3-*c*]pyrimidin-8-yl)benzamido)cyclobutane-1-carboxamido)-3,3-dimethylbutanoyl)-4-hydroxypyrrolidine-2-carboxamide (0.91 mg, 10%).

<sup>1</sup>H NMR (CD<sub>3</sub>OD-*d*<sub>4</sub>, 400 MHz):  $\delta$  9.32 (s, 1H), 8.93 (s, 1H), 8.07 (s, 1H), 8.04 (d, *J* = 8.59 Hz, 2H), 7.95 (d, *J* = 8.52 Hz, 2H), 7.49 (d, *J* = 7.80 Hz, 2H), 7.07 – 7.05 (m, 1H), 7.02 (m, 1H), 6.46 – 6.37 (m, 2H), 4.76 – 4.71 (m, 2H), 4.69 – 4.66 (m, 1H), 4.64 – 4.58 (m, 2H), 4.54 – 4.39 (m, 5H), 4.27 – 4.22 (m, 2H), 3.97 – 3.90 (m, 2H), 3.82 (dd, *J* = 3.87, 11.12 Hz, 1H), 3.76 – 3.71 (m, 2H), 3.64 – 3.59 (m, 2H), 3.52 (t, *J* = 6.65 Hz, 2H), 3.28 (t, *J* = 6.52 Hz, 2H), 3.25 – 3.18 (m, 1H), 2.66 – 2.57 (m, 4H), 2.50 (s, 3H), 2.45 – 2.37 (m, 3H), 2.27 – 2.20 (m, 1H), 2.14 – 2.06 (m, 1H), 1.76 – 1.69 (m, 2H), 1.60 – 1.52 (m, 2H), 1.46 – 1.32 (m, 6H), 1.04 (s, 9H). LCMS: expected mass for [M+H]<sup>+</sup> (C<sub>54</sub>H<sub>68</sub>ClN<sub>10</sub>O<sub>9</sub>S) requires 1067.45 m/z, found 1067.3 m/z.

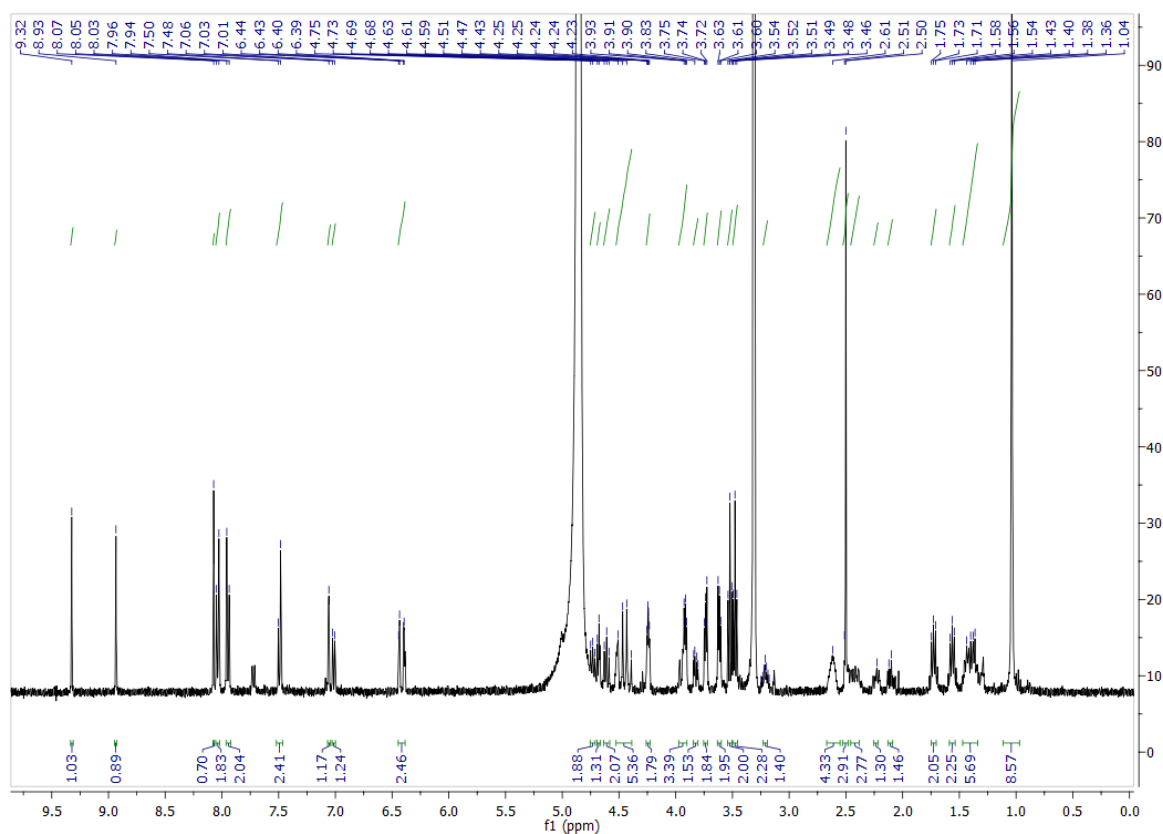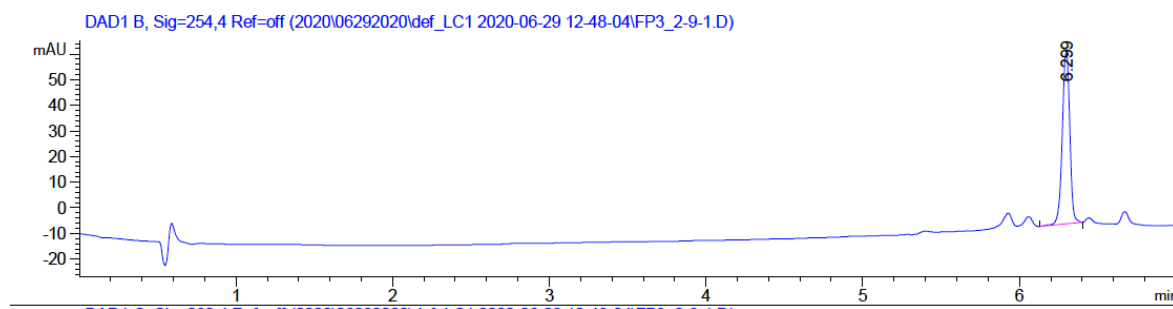

**(1S,3S)-3-amino-N-(2-(2-((6-chlorohexyl)oxy)ethoxy)ethyl)cyclobutane-1-carboxamide 2,2,2-trifluoroacetate, 29**

**2,2,2-**

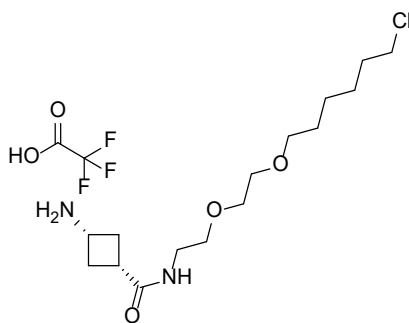

To a flask was added (1S,3S)-3-((*tert*-butoxycarbonyl)amino)cyclobutane-1-carboxylic acid (25 mg, 0.12 mmol, 1.0 equiv), DIPEA (61  $\mu$ L, 0.35 mmol, 3.0 equiv), TBTU (48 mg, 0.15 mmol, 1.3 equiv), followed by 2-(2-((6-chlorohexyl)oxy)ethoxy)ethan-1-amine 2,2,2-trifluoroacetate (39 mg, 0.12 mmol, 1.0 equiv) in DMF (1 mL) and the reaction stirred at room temperature for 16 hr. The reaction was concentrated and purified by column chromatography (0-10% MeOH in  $\text{CH}_2\text{Cl}_2$ ) to yield the intermediate as a clear oil. The *N*-Boc intermediate was deprotected with 20% TFA in  $\text{CH}_2\text{Cl}_2$ , concentrated *in vacuo* and purified by reverse phase column chromatography (MeOH in  $\text{H}_2\text{O}$  (+0.1% TFA)) to yield the desired product as a white solid (1S,3S)-3-amino-N-(2-(2-((6-chlorohexyl)oxy)ethoxy)ethyl)cyclobutane-1-carboxamide 2,2,2-trifluoroacetate (**29**) (15 mg, 30%).

$^1\text{H}$  NMR ( $\text{CD}_3\text{OD}-d_4$ , 400 MHz):  $\delta$  3.72 (p,  $J = 7.9$  Hz, 1H), 3.62 – 3.52 (m, 8H), 3.49 (t,  $J = 6.56$  Hz, 2H), 3.37 (t,  $J = 5.47$  Hz, 2H), 2.97 (p,  $J = 8.4$  Hz, 1H), 2.63 – 2.53 (m, 2H), 2.33 – 2.24 (m, 2H), 1.82 – 1.72 (m, 2H), 1.64 – 1.55 (m, 2H), 1.52 – 1.36 (m, 4H).  $^{13}\text{C}$  NMR ( $\text{CD}_3\text{OD}-d_4$ , 101 MHz):  $\delta$  175.78, 72.21, 71.24, 71.16, 70.44, 45.68, 43.34, 40.59, 34.27, 33.73, 31.43, 30.49, 27.71, 26.46. LCMS: expected mass for  $[\text{M}+\text{H}]^+$  ( $\text{C}_{15}\text{H}_{30}\text{ClN}_2\text{O}_3$ ) requires 321.19 m/z, found 321.20 m/z.

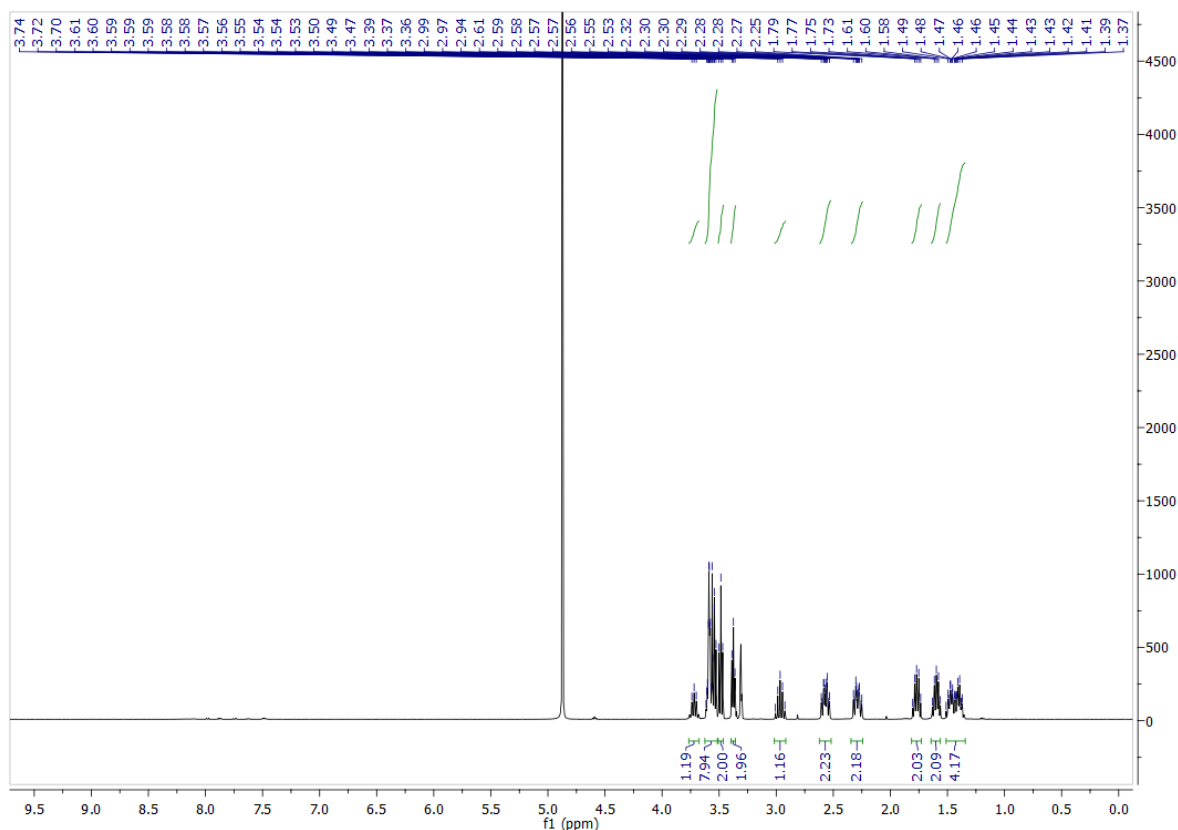

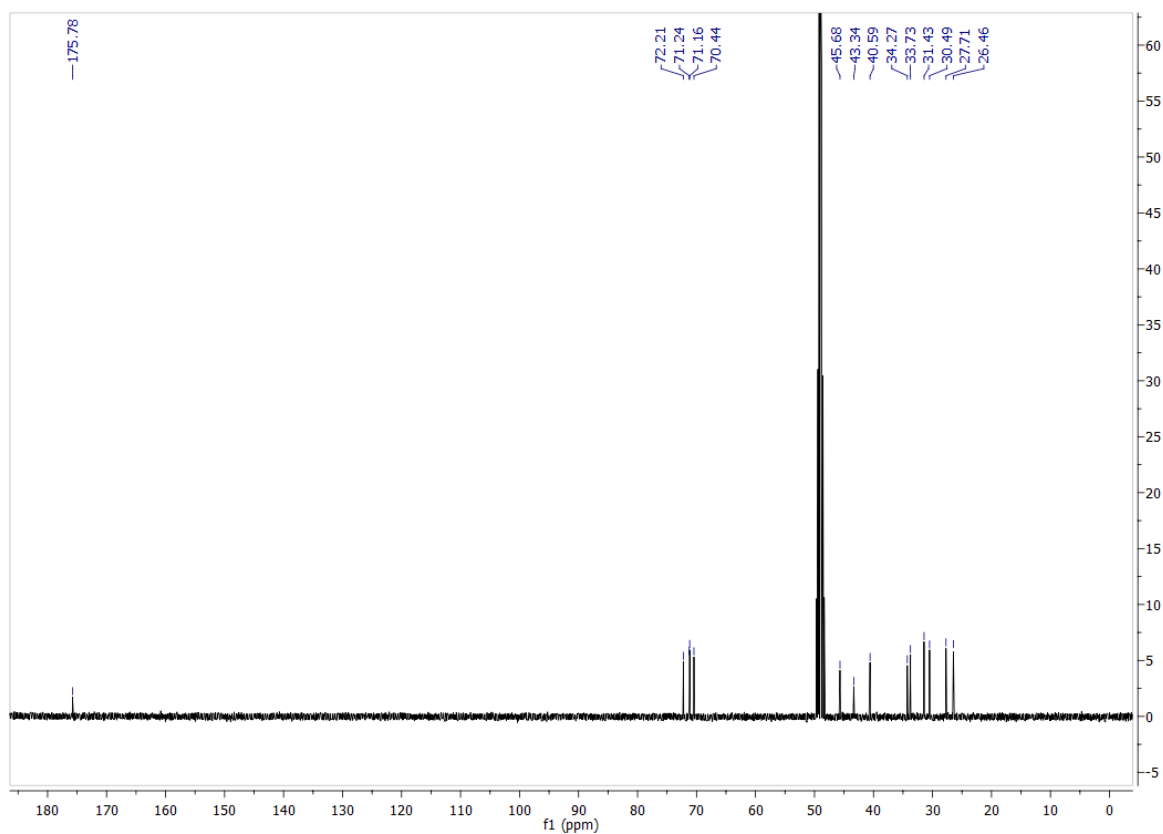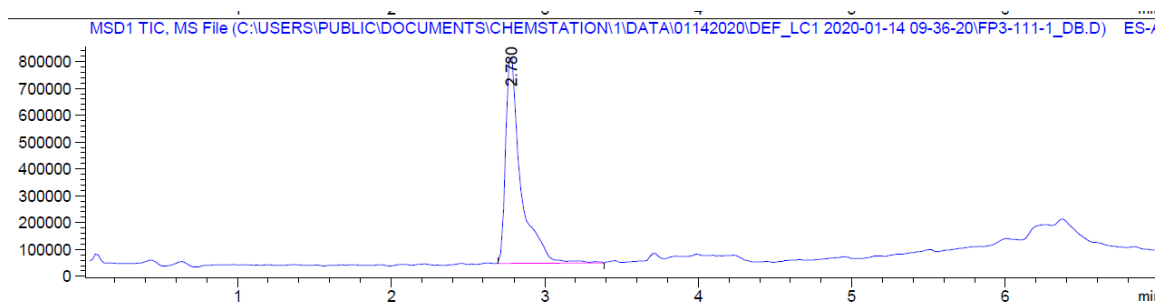

**(1*R*,3*R*)-3-amino-*N*-(2-(2-((6-chlorohexyl)oxy)ethoxy)ethyl)cyclobutane-1-carboxamide 2,2,2-trifluoroacetate, 30** **2,2,2-**

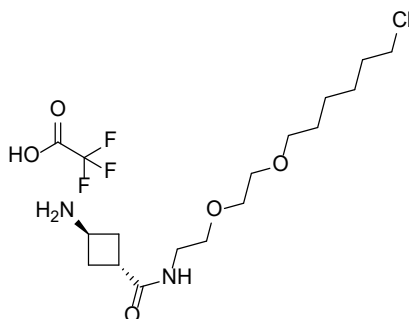

To a flask was added (1*R*,3*R*)-3-((*tert*-butoxycarbonyl)amino)cyclobutane-1-carboxylic acid (25 mg, 0.12 mmol, 1.0 equiv), DIPEA (61  $\mu$ L, 0.35 mmol, 3.0 equiv), TBTU (48 mg, 0.15 mmol, 1.3 equiv), followed by 2-(2-((6-chlorohexyl)oxy)ethoxy)ethan-1-amine 2,2,2-trifluoroacetate (39 mg, 0.12 mmol, 1.0 equiv) in DMF (1 mL) and the reaction stirred at room temperature for 16 hr. The reaction was



concentrated and purified by column chromatography (0-10% MeOH in CH<sub>2</sub>Cl<sub>2</sub>) to yield the intermediate as a clear oil. The *N*-Boc was deprotected with 20% TFA in CH<sub>2</sub>Cl<sub>2</sub>, concentrated *in vacuo* and purified by reverse phase column chromatography (MeOH in H<sub>2</sub>O (+0.1% TFA)) to yield the desired product as a white solid (1*R*,3*R*)-3-amino-*N*-(2-(2-((6-chlorohexyl)oxy)ethoxy)ethyl)cyclobutane-1-carboxamide 2,2,2-trifluoroacetate (**29**) (6 mg, 11%).

<sup>1</sup>H NMR (CD<sub>3</sub>OD-*d*<sub>4</sub>, 400 MHz): δ 3.97 (p, *J* = 7.7 Hz, 1H), 3.61 – 3.52 (m, 8H), 3.48 (t, *J* = 6.57 Hz, 2H), 3.38 (t, *J* = 5.46 Hz, 2H), 3.18 – 3.09 (m, 1H), 2.61 – 2.50 (m, 2H), 2.44 – 2.33 (m, 2H), 1.81 – 1.72 (m, 2H), 1.64 – 1.56 (m, 2H), 1.51 – 1.36 (m, 4H). <sup>13</sup>C NMR (CD<sub>3</sub>OD-*d*<sub>4</sub>, 101 MHz): δ 176.64, 72.22, 71.22, 71.18, 70.49, 45.68, 45.24, 40.52, 34.84, 33.73, 31.15, 30.49, 27.72, 26.46. LCMS: expected mass for [M+H]<sup>+</sup> (C<sub>15</sub>H<sub>30</sub>ClN<sub>2</sub>O<sub>3</sub>) requires 321.19 m/z, found 321.20 m/z.

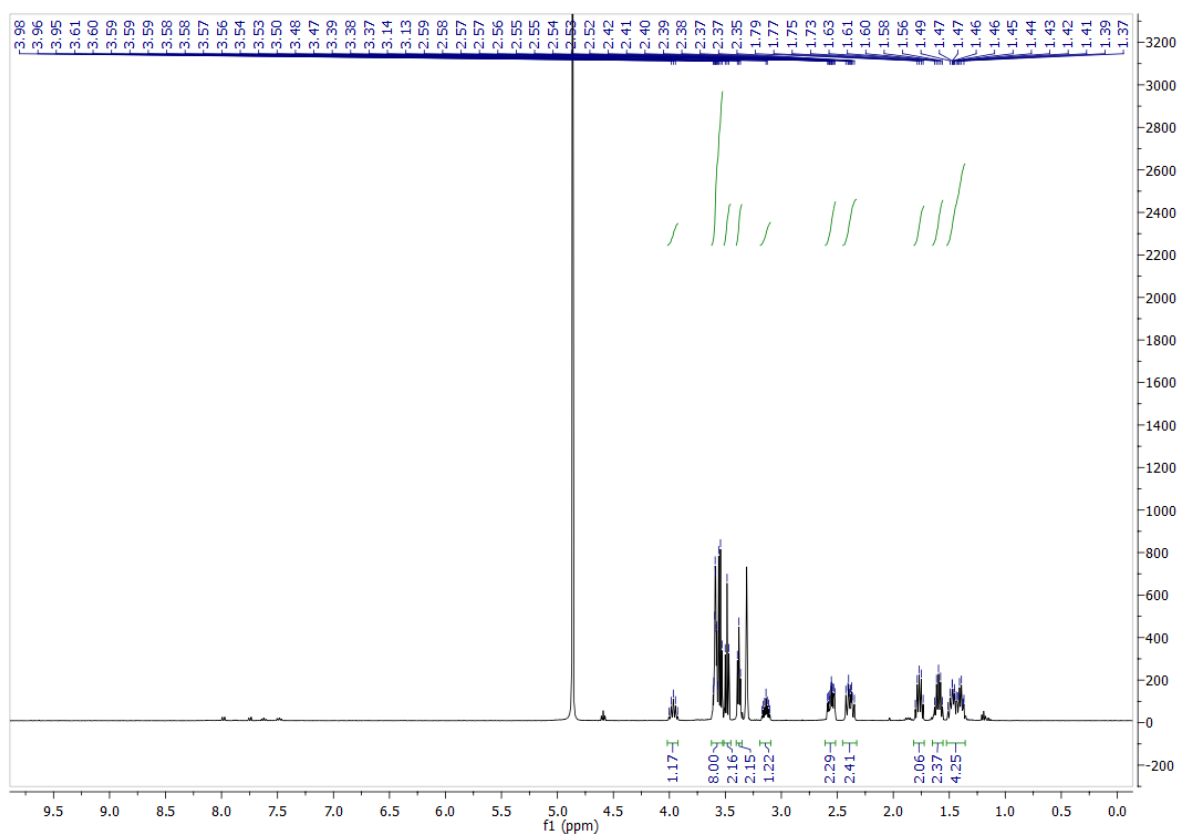

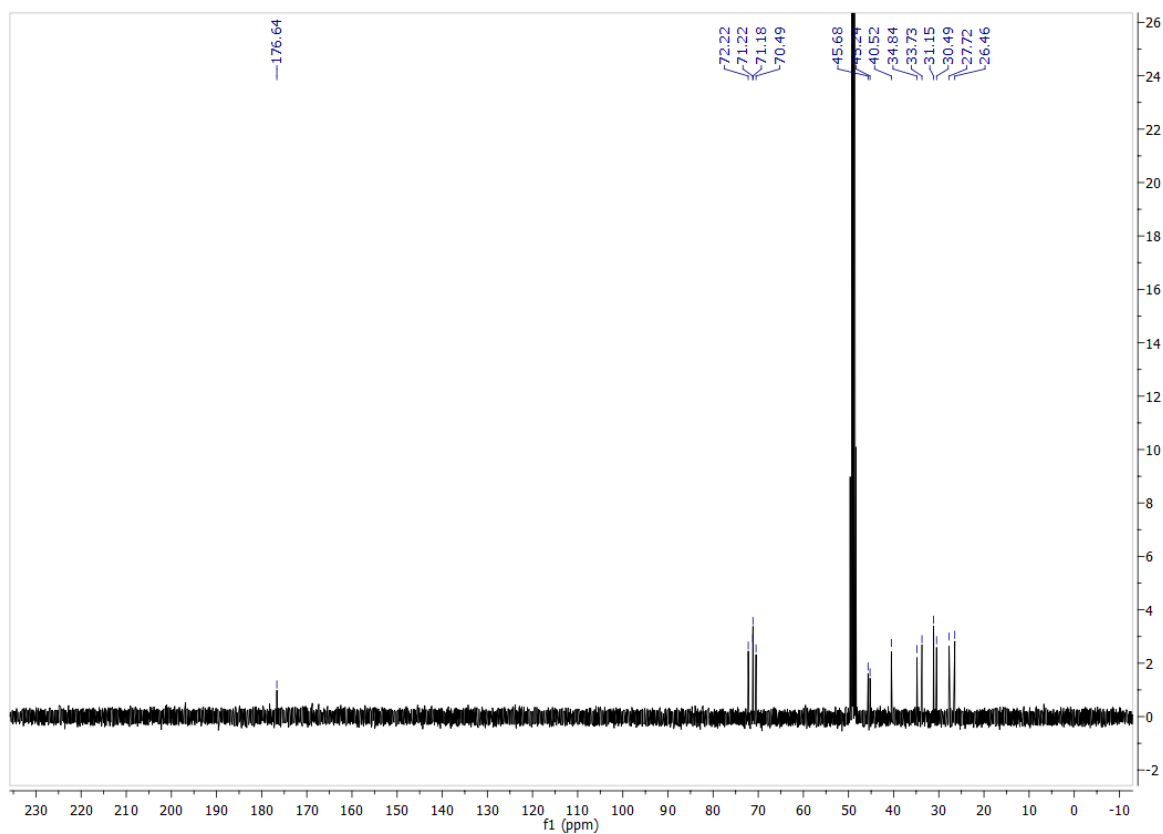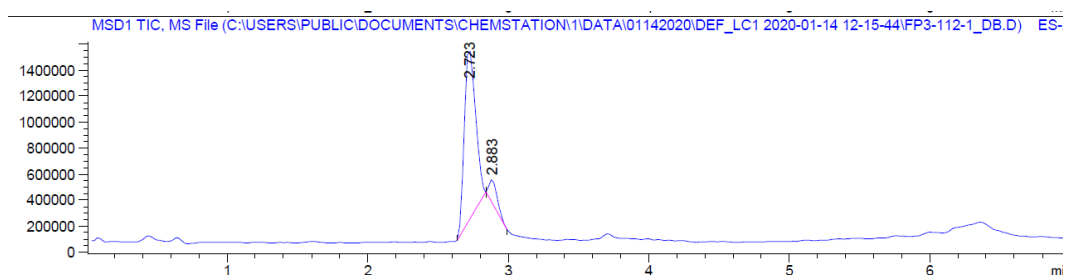

***N*-((1*S*,3*S*)-3-((2-(2-((6-chlorohexyl)oxy)ethoxy)ethyl)carbamoyl)cyclobutyl)-4-(5-((furan-2-ylmethyl)amino)-[1,2,4]triazolo[4,3-*c*]pyrimidin-8-yl)benzamide, UNC7792**

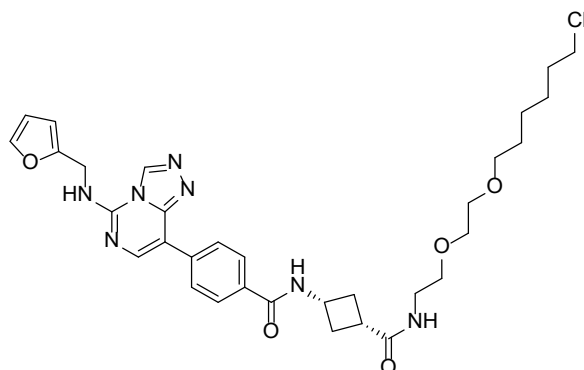

To a flask was added 4-(5-((furan-2-ylmethyl)amino)-[1,2,4]triazolo[4,3-*c*]pyrimidin-8-yl)benzoic acid (**9**) (13 mg, 38  $\mu$ mol, 1.1 equiv), DIPEA (18  $\mu$ L, 102  $\mu$ mol, 3.0 equiv), TBTU (14 mg, 45  $\mu$ mol 1.3 equiv), followed by (1*S*,3*S*)-3-amino-*N*-(2-(2-((6-chlorohexyl)oxy)ethoxy)ethyl)cyclobutane-1-carboxamide

2,2,2-trifluoroacetate (**29**) (15 mg, 34  $\mu$ mol, 1.0 equiv) in DMF (0.5 mL) and the reaction stirred at room temperature for 16 hr. The reaction was concentrated and purified by reverse phase column chromatography (MeOH in H<sub>2</sub>O (+0.1% TFA)) to yield the desired product as a white solid *N*-((1*S*,3*S*)-3-((2-(2-((6-chlorohexyl)oxy)ethoxy)ethyl)carbamoyl)cyclobutyl)-4-(5-((furan-2-ylmethyl)amino)-[1,2,4]triazolo[4,3-*c*]pyrimidin-8-yl)benzamide (2 mg, 9%).

<sup>1</sup>H NMR (CD<sub>3</sub>OD-*d*<sub>4</sub>, 400 MHz):  $\delta$  9.32 (s, 1H), 8.08 (s, 1H), 8.04 (d, *J* = 8.55 Hz, 2H), 7.96 (d, *J* = 8.57 Hz, 2H), 7.50 – 7.46 (m, 1H), 6.45 – 6.38 (m, 2H), 4.55 – 4.44 (m, 1H), 3.63 – 3.58 (m, 4H), 3.57 – 3.52 (m, 4H), 3.49 (t, *J* = 6.56 Hz, 2H), 3.38 (t, *J* = 5.48 Hz, 2H), 2.91 – 2.81 (m, 1H), 2.59 (m, 2H), 2.37 – 2.27 (m, 2H), 1.80 – 1.71 (m, 2H), 1.64 – 1.56 (m, 2H), 1.51 – 1.35 (m, 4H). 2  $\times$  1H not observed (under H<sub>2</sub>O peak). <sup>13</sup>C NMR (CD<sub>3</sub>OD-*d*<sub>4</sub>, 101 MHz):  $\delta$  176.70, 168.92, 152.19, 145.31, 144.04, 143.73, 137.84, 134.60, 128.86, 128.74, 112.46, 111.53, 109.25, 72.24, 71.28, 71.19, 70.56, 45.68, 42.37, 40.50, 39.34, 34.40, 34.04, 33.75, 30.54, 27.74, 26.49. 2  $\times$  C not observed. LCMS: expected mass for [M+H]<sup>+</sup> (C<sub>32</sub>H<sub>41</sub>ClN<sub>7</sub>O<sub>5</sub>) requires 638.28 m/z, found 638.30 m/z.

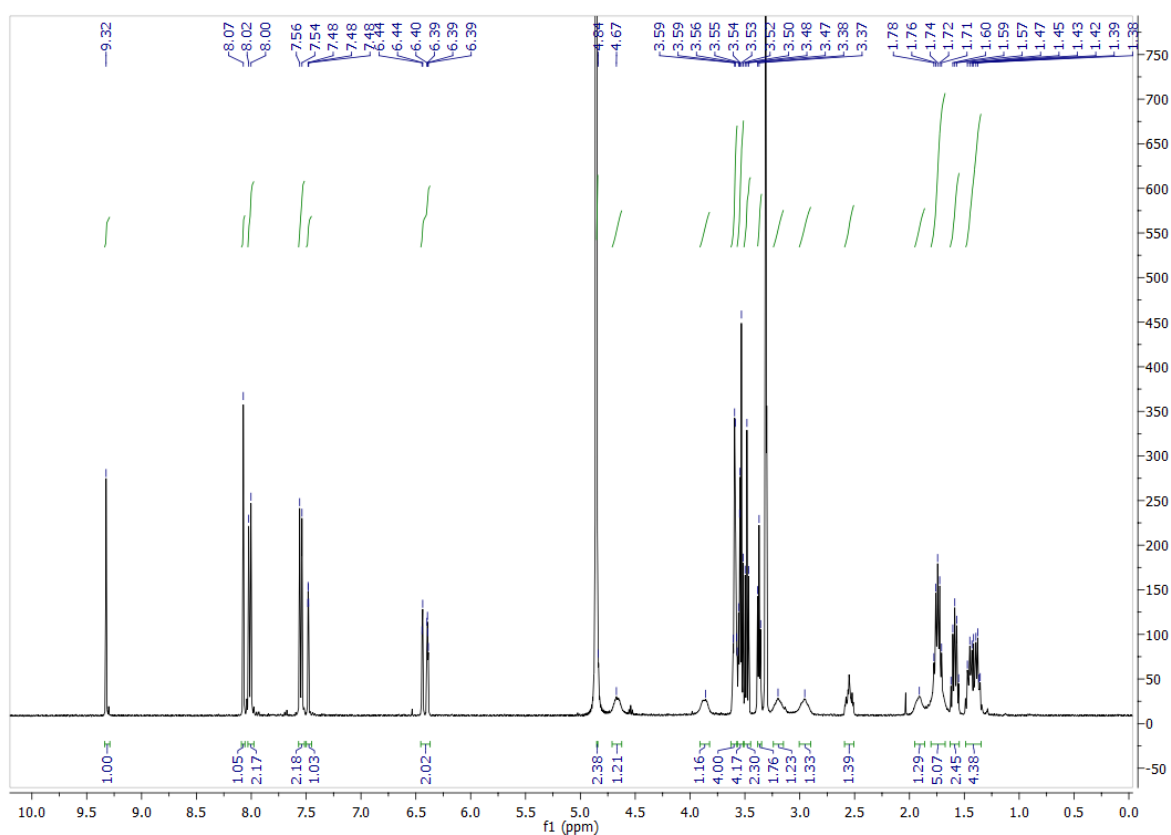



DAD1 B, Sig=254.4 Ref=off (C:\USERSIP...TION\1\DATA\01142020\DEF\_LC1 2020-01-14 16-05-38\FP3-113-1\_F27.D)

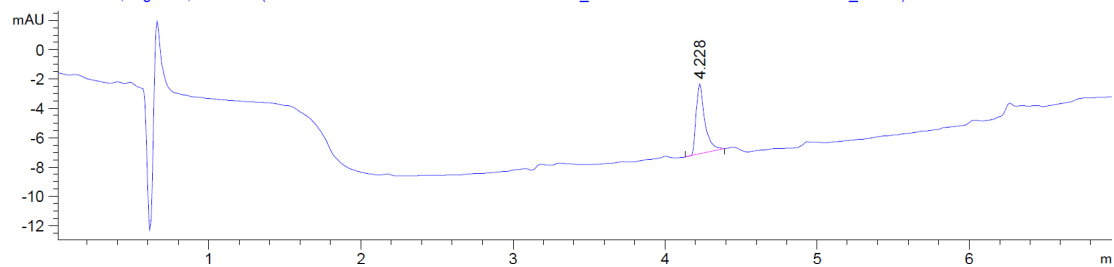

***N*-((1*R*,3*R*)-3-((2-(2-((6-chlorohexyl)oxy)ethoxy)ethyl)carbamoyl)cyclobutyl)-4-(5-((furan-2-ylmethyl)amino)-[1,2,4]triazolo[4,3-*c*]pyrimidin-8-yl)benzamide, UNC7794**

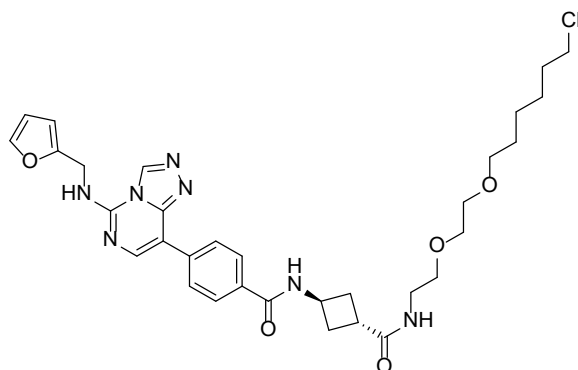

To a flask was added 4-(5-((furan-2-ylmethyl)amino)-[1,2,4]triazolo[4,3-*c*]pyrimidin-8-yl)benzoic acid (**9**) (13 mg, 38  $\mu$ mol, 1.1 equiv), DIPEA (18  $\mu$ L, 102  $\mu$ mol, 3.0 equiv), TBTU (14 mg, 45  $\mu$ mol 1.3 equiv), followed by (1*R*,3*R*)-3-amino-*N*-(2-(2-((6-chlorohexyl)oxy)ethoxy)ethyl)cyclobutane-1-carboxamide

2,2,2-trifluoroacetate (**30**) (15 mg, 34  $\mu\text{mol}$ , 1.0 equiv) in DMF (0.5 mL) and the reaction stirred at room temperature for 16 hr. The reaction was concentrated and purified by reverse phase column chromatography (MeOH in  $\text{H}_2\text{O}$  (+0.1% TFA)) to yield the desired product as a white solid *N*-((1*R*,3*R*)-3-((2-(2-((6-chlorohexyl)oxy)ethoxy)ethyl)carbamoyl)cyclobutyl)-4-(5-((furan-2-ylmethyl)amino)-[1,2,4]triazolo[4,3-*c*]pyrimidin-8-yl)benzamide (2 mg, 9%).

$^1\text{H}$  NMR ( $\text{CD}_3\text{OD}-d_4$ , 400 MHz):  $\delta$  9.30 (s, 1H), 8.07 (s, 1H), 8.04 (d,  $J = 6.40$  Hz, 2H), 7.94 (d,  $J = 8.55$  Hz, 2H), 7.49 – 7.47 (m, 1H), 6.45 – 6.37 (m, 2H), 4.84 (s, 2H), 4.76 – 4.67 (m, 1H), 3.64 – 3.58 (m, 4H), 3.58 – 3.53 (m, 4H), 3.50 (t,  $J = 6.58$  Hz, 2H), 3.40 (t,  $J = 5.45$  Hz, 2H), 3.14 – 3.05 (m, 1H), 2.67 – 2.60 (m, 2H), 2.48 – 2.38 (m, 2H), 1.80 – 1.72 (m, 2H), 1.65 – 1.56 (m, 2H), 1.51 – 1.37 (m, 4H).  $^{13}\text{C}$  NMR ( $\text{CD}_3\text{OD}-d_4$ , 101 MHz):  $\delta$  177.93, 152.30, 143.69, 143.10, 138.07, 137.06, 134.63, 128.76, 128.68, 112.83, 111.52, 109.17, 72.24, 71.27, 71.20, 70.62, 45.68, 45.03, 40.48, 39.30, 35.31, 33.82, 33.75, 30.54, 27.75, 26.49.  $3 \times \text{C}$  not observed. LCMS: expected mass for  $[\text{M}+\text{H}]^+$  ( $\text{C}_{32}\text{H}_{41}\text{ClN}_7\text{O}_5$ ) requires 638.28  $m/z$ , found 638.3  $m/z$ .

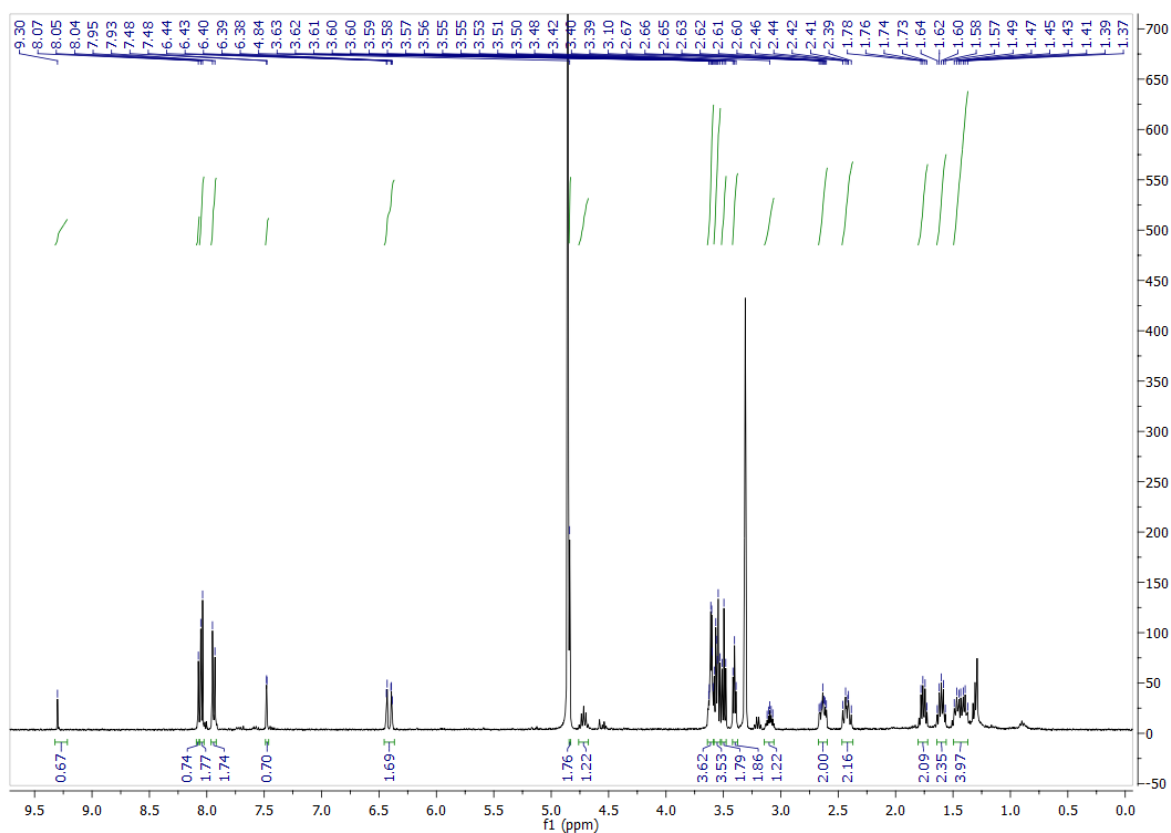

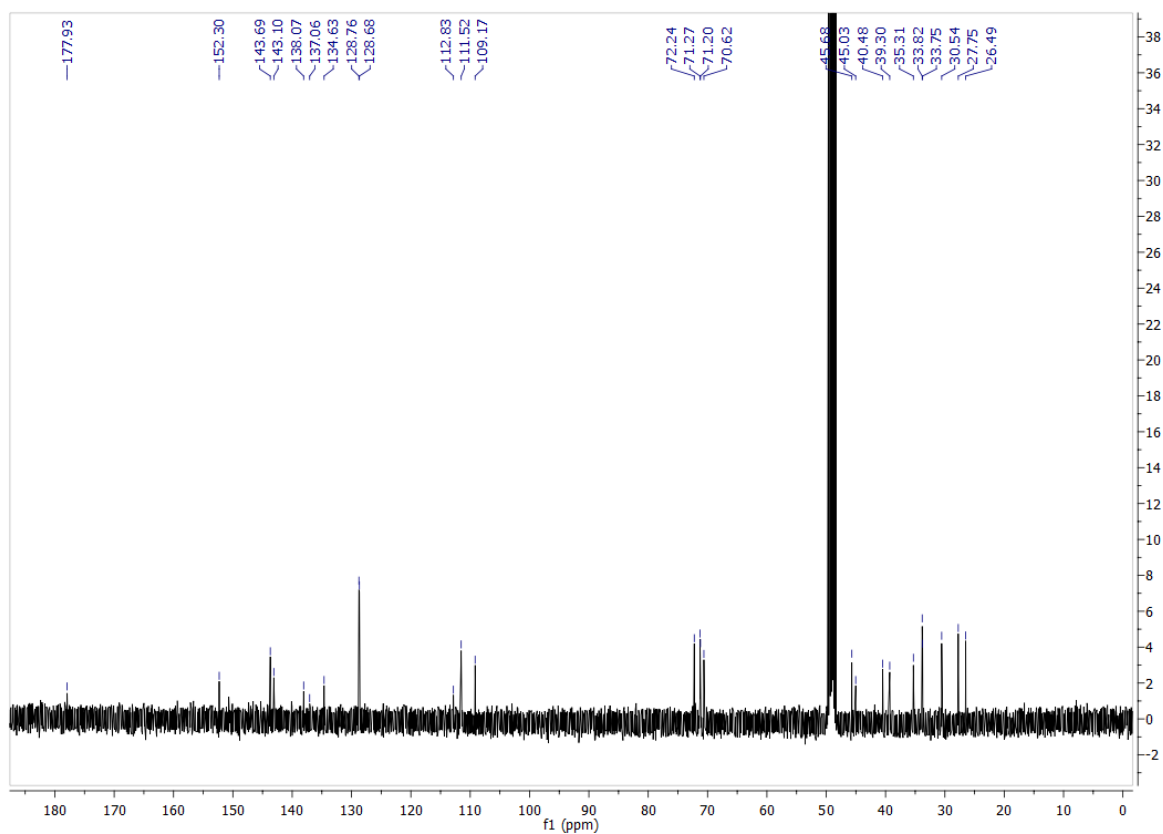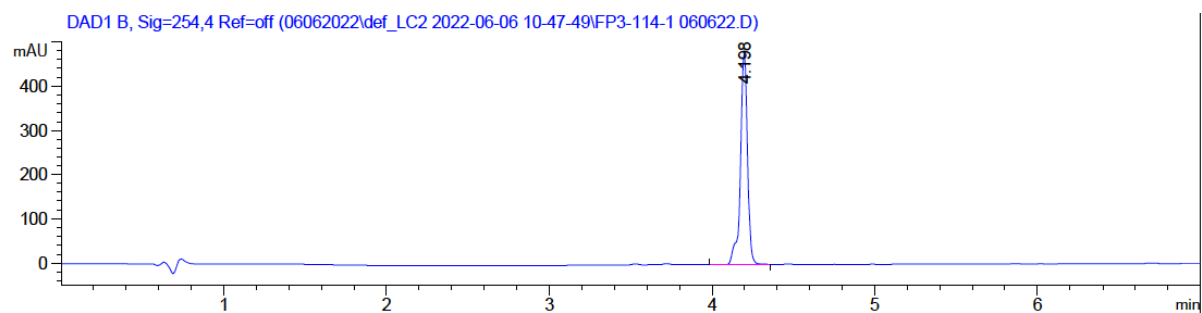

## References

- (1) Potjewyd, F.; Turner, A. M. W.; Beri, J.; Rectenwald, J. M.; Norris-Drouin, J. L.; Cholensky, S. H.; Margolis, D. M.; Pearce, K. H.; Herring, L. E.; James, L. I. Degradation of Polycomb Repressive Complex 2 with an EED-Targeted Bivalent Chemical Degradator. *Cell Chem Biol* 2020, 27 (1), 47-56.e15. <https://doi.org/10.1016/j.chembiol.2019.11.006>.
